# Supplementary figures and images for: Challenges in Clinical Metaproteomics Highlighted by the Analysis of Acute Leukemia Patients with Gut Colonization by Multidrug-Resistant Enterobacteriaceae
Source: MDPI journal article supplement (doi:10.3390/proteomes7010002), 2019-01-08

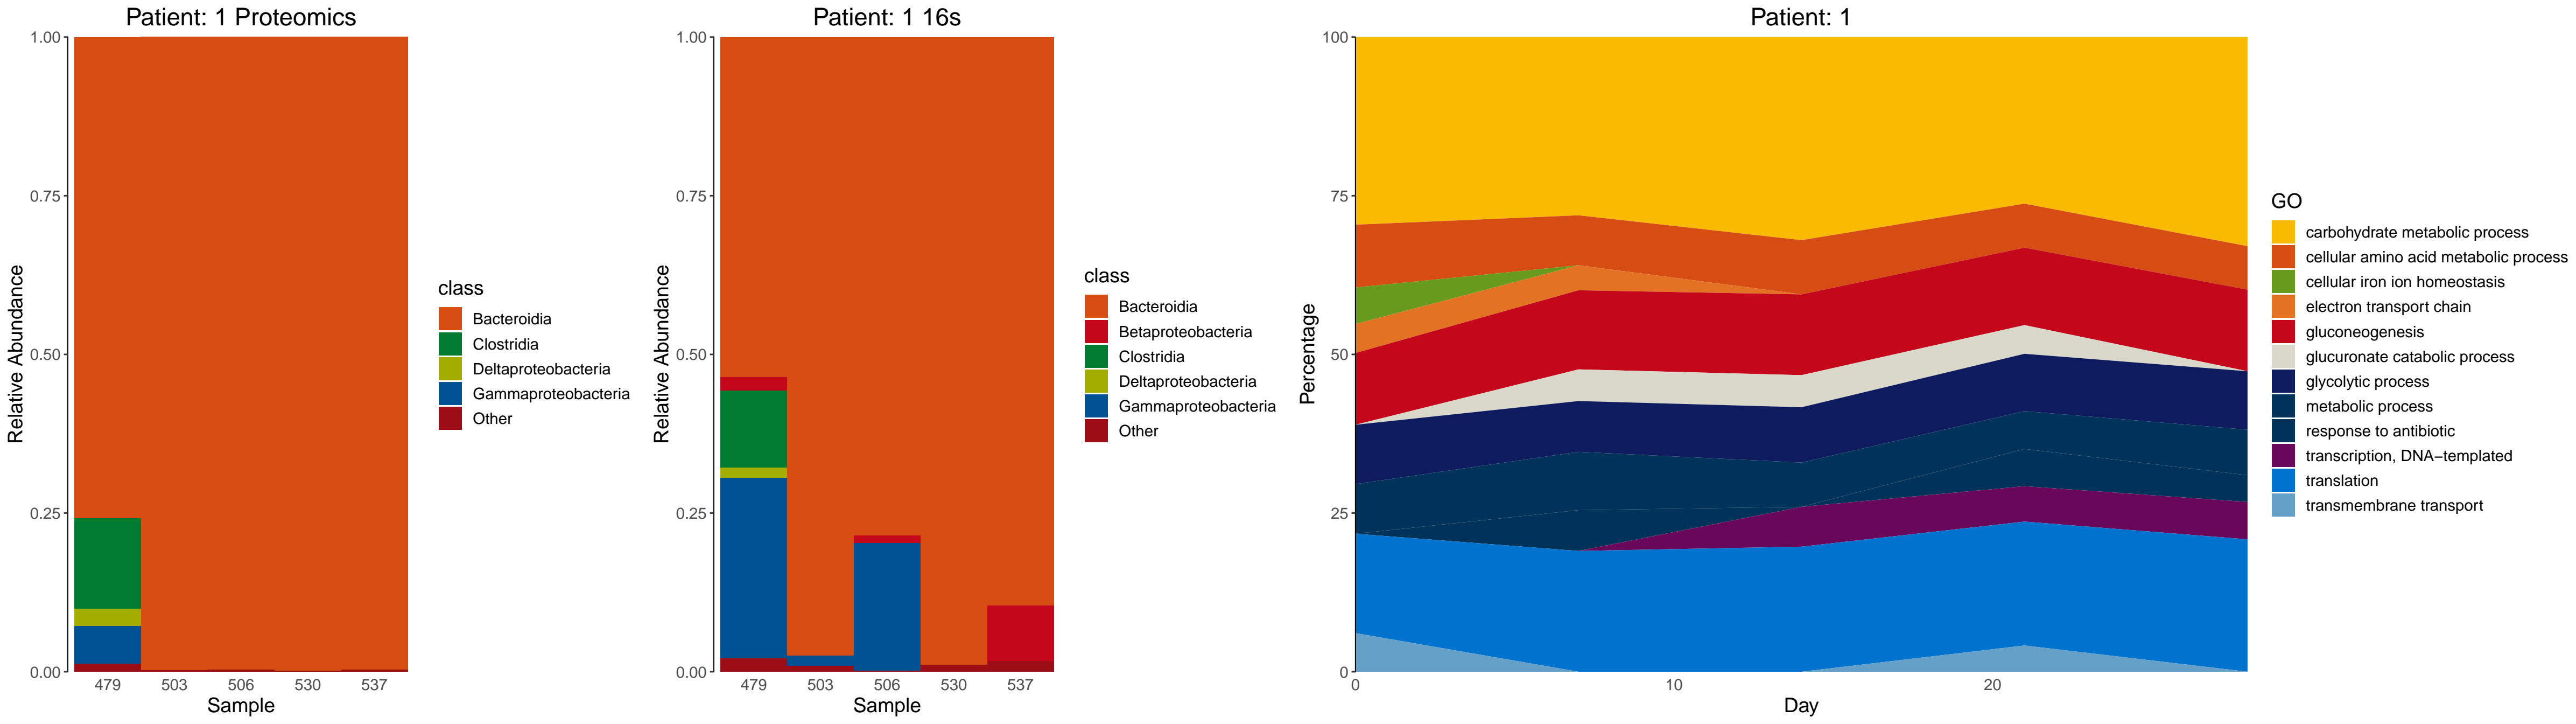

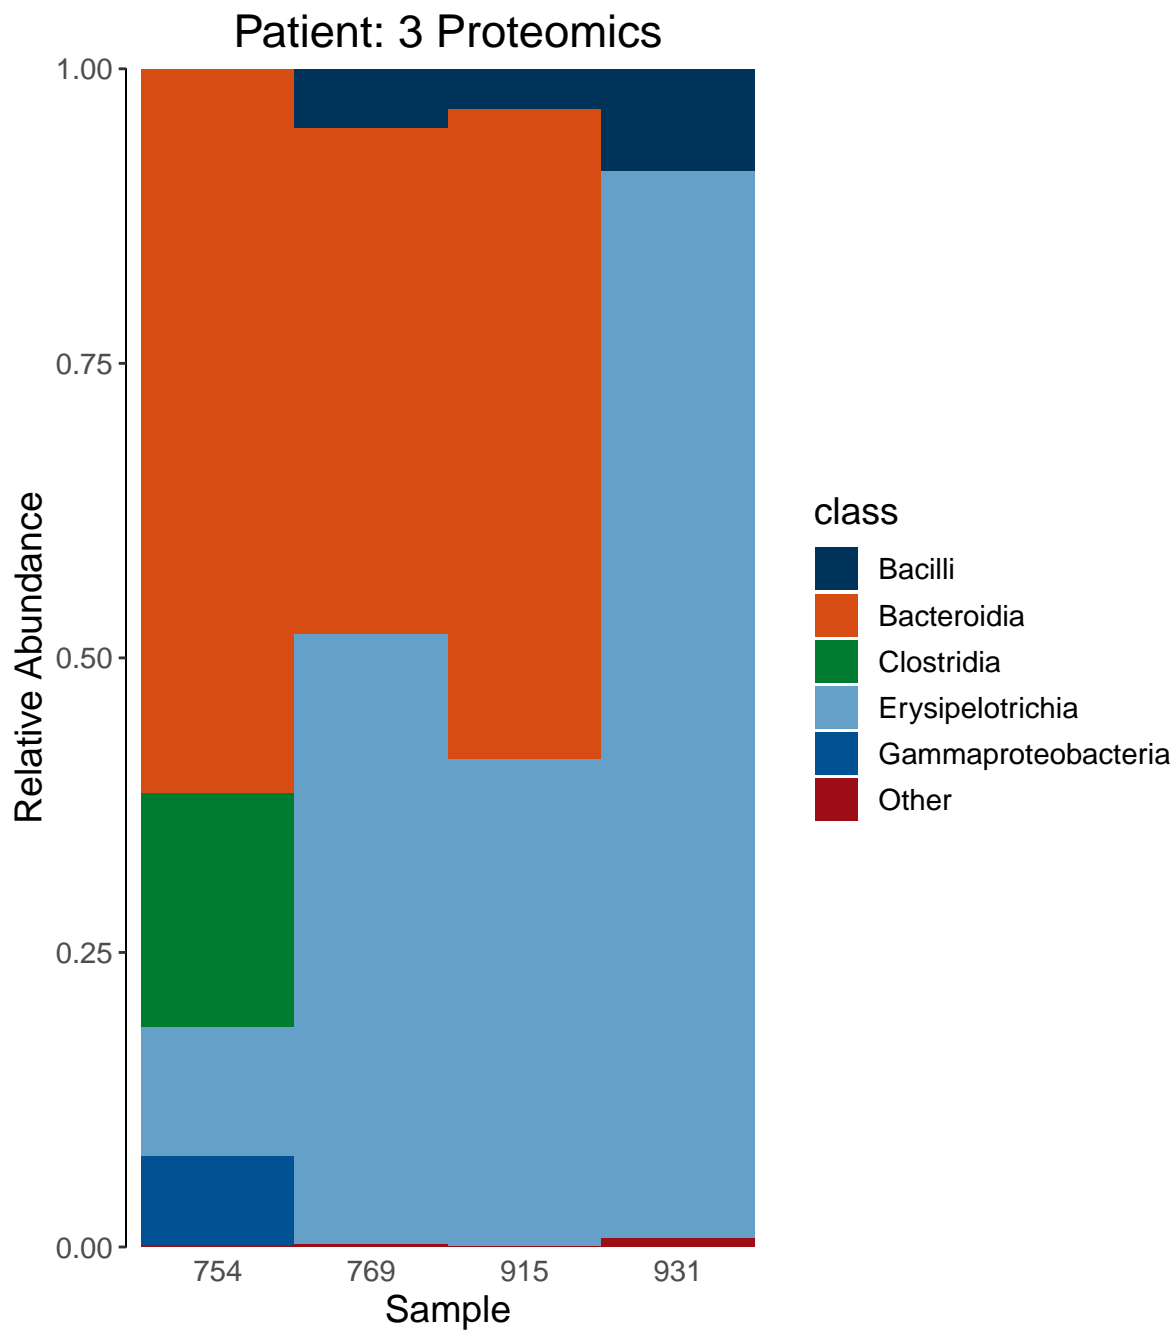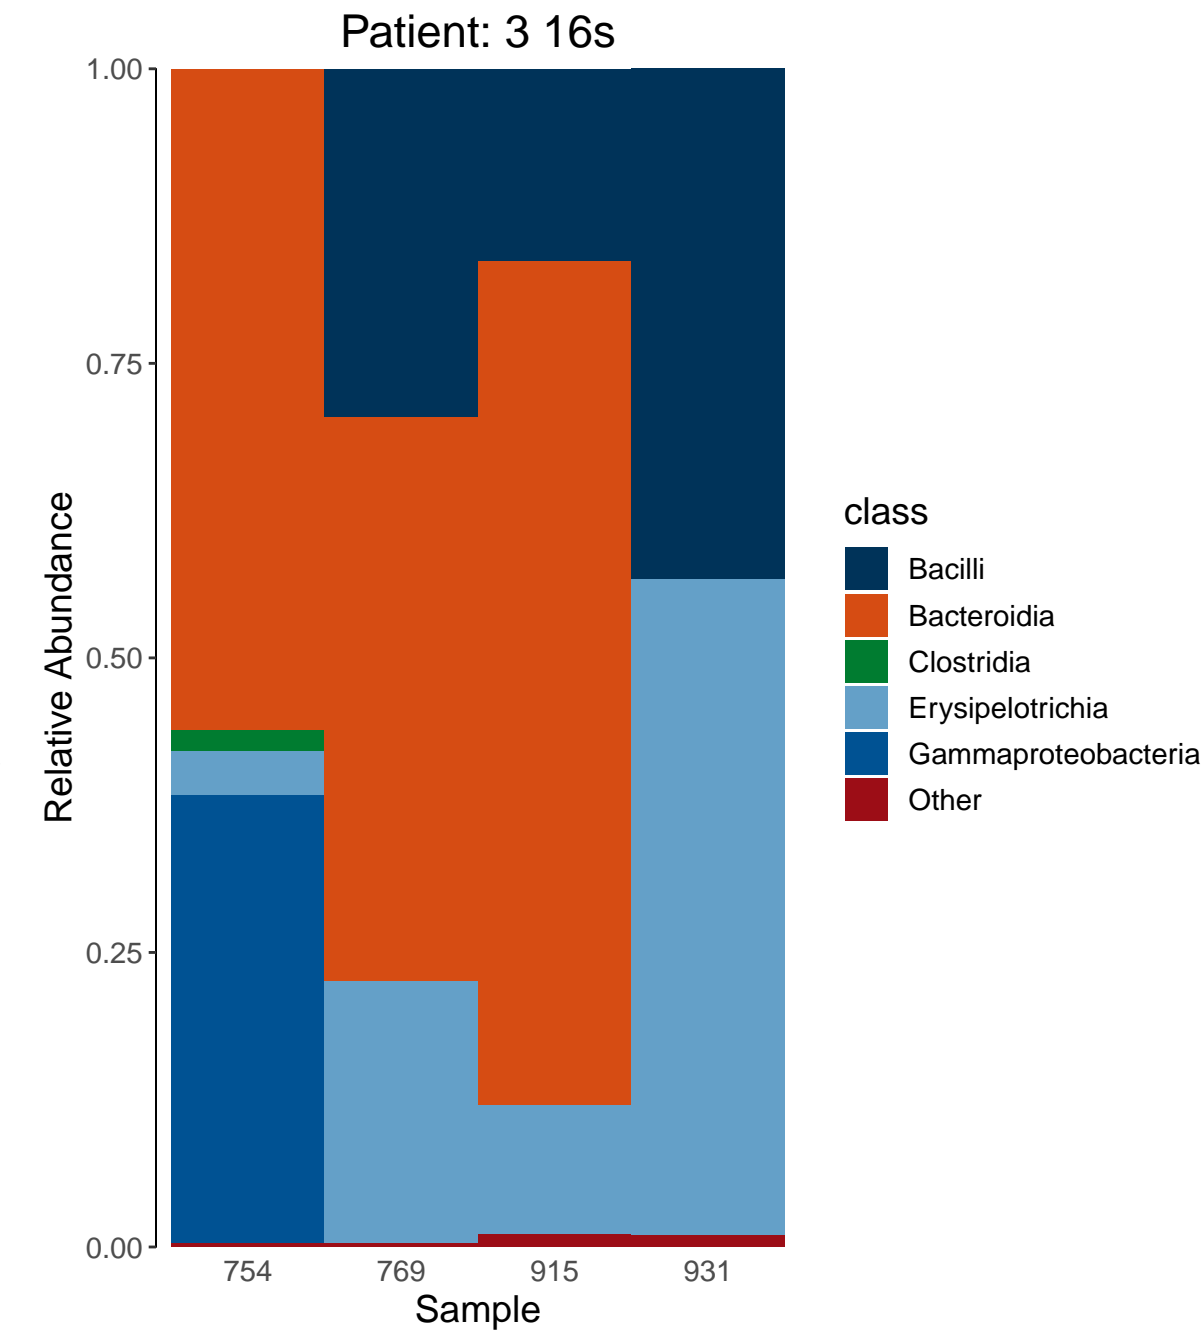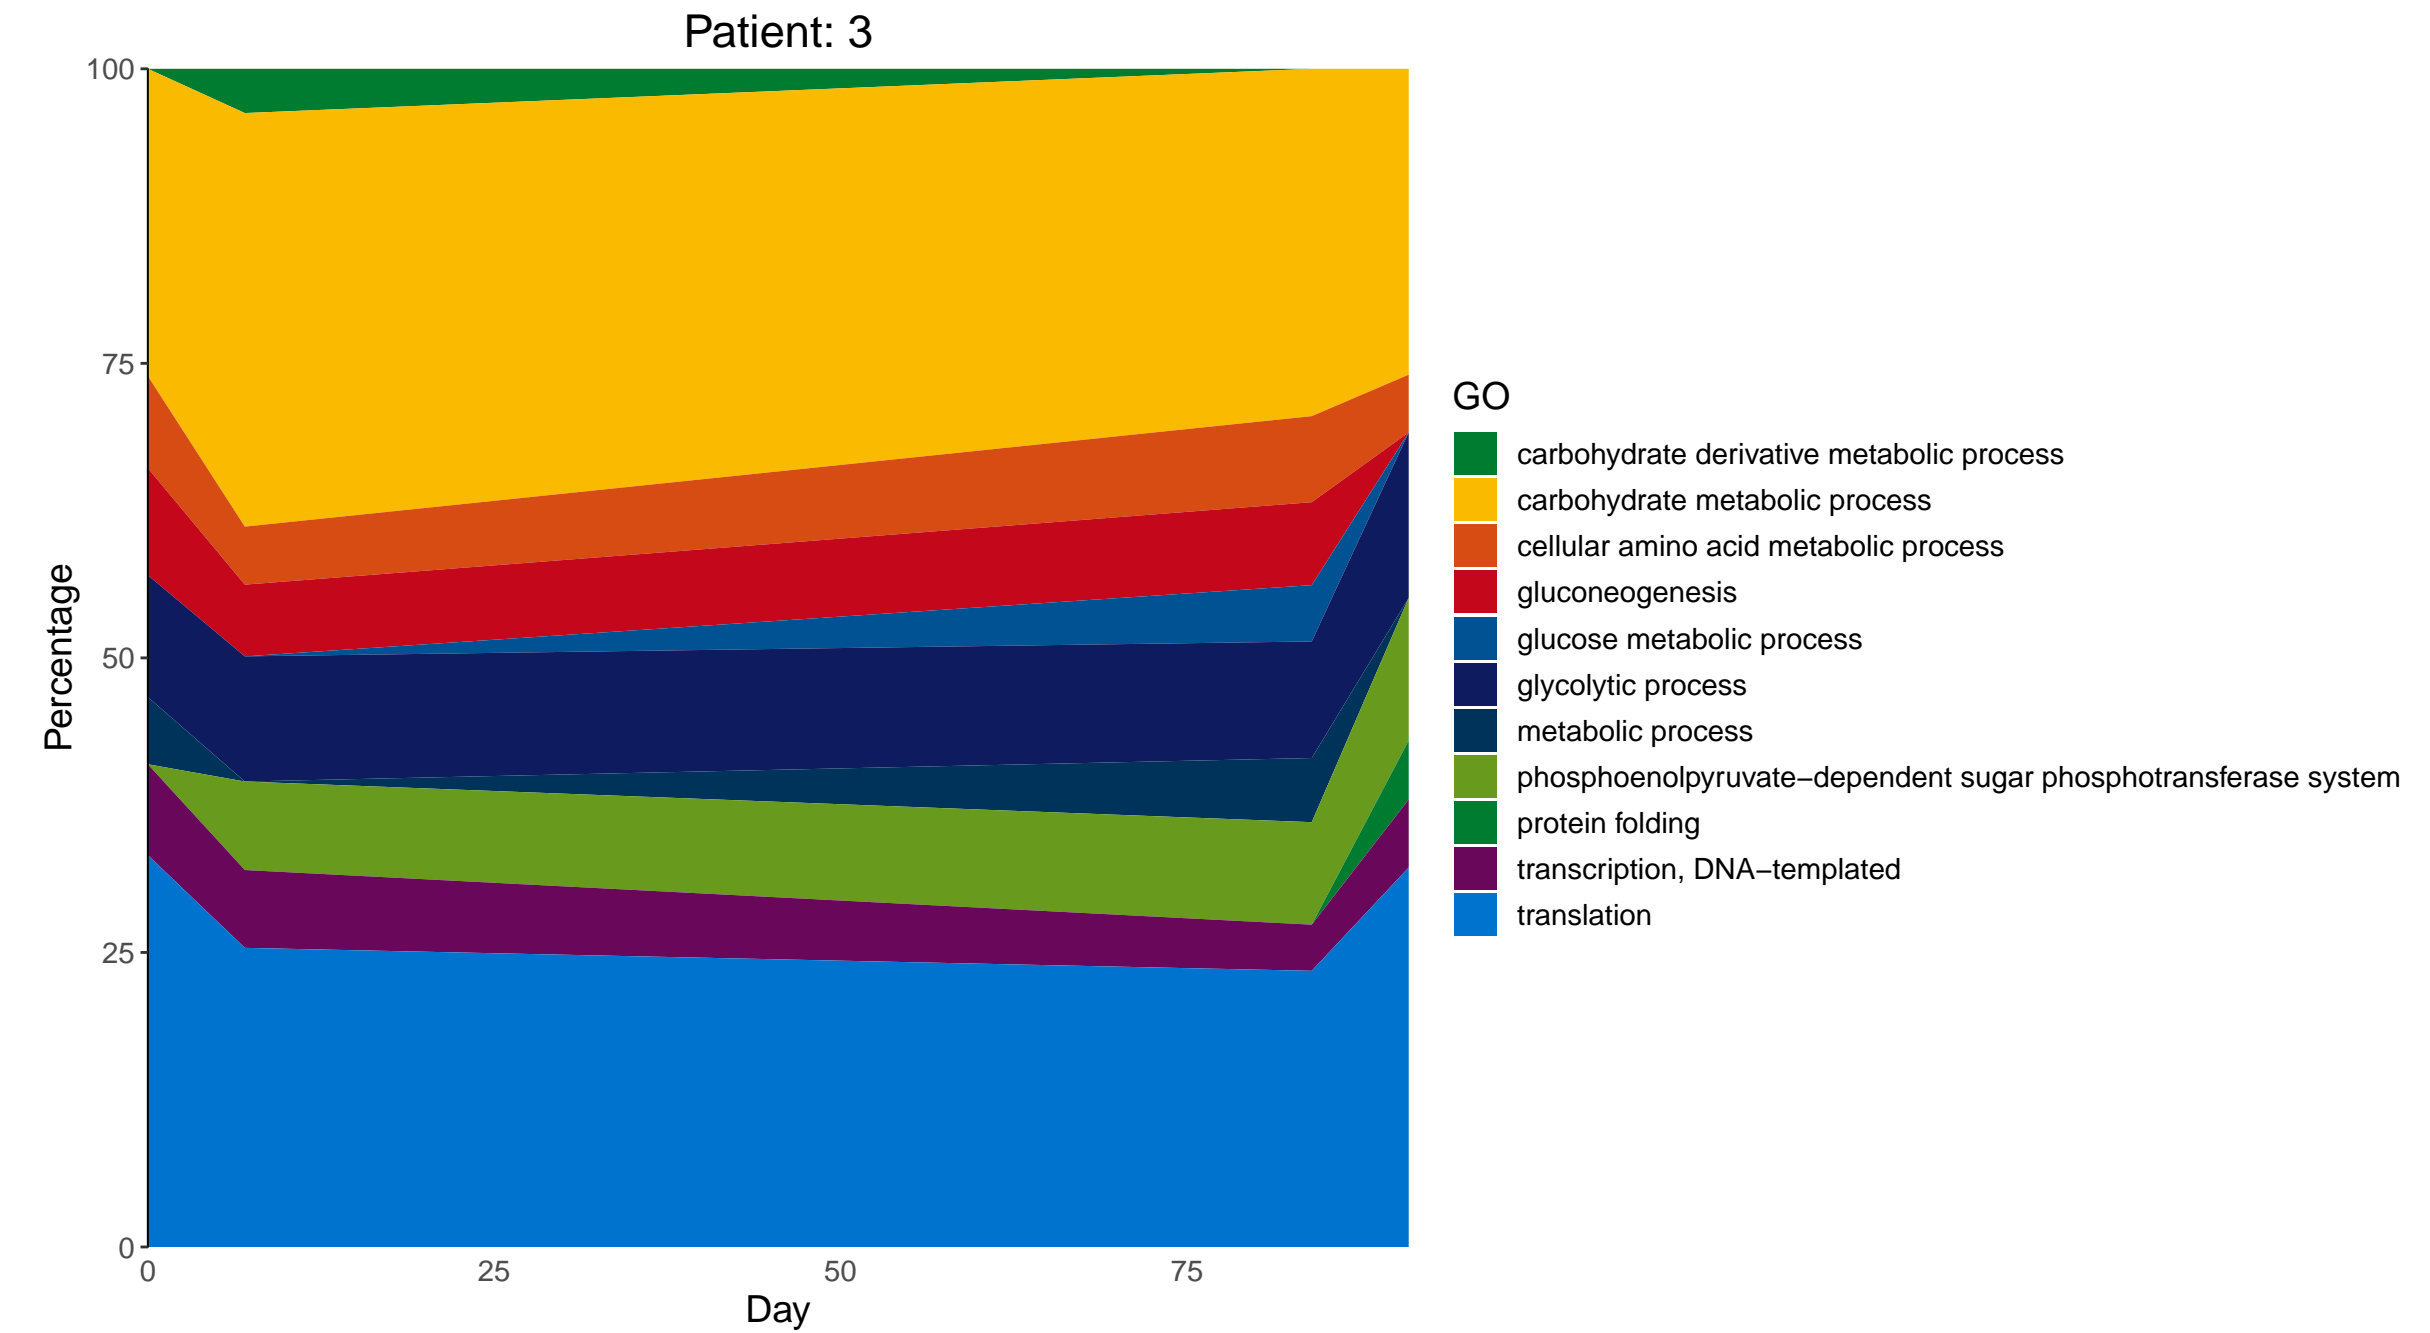

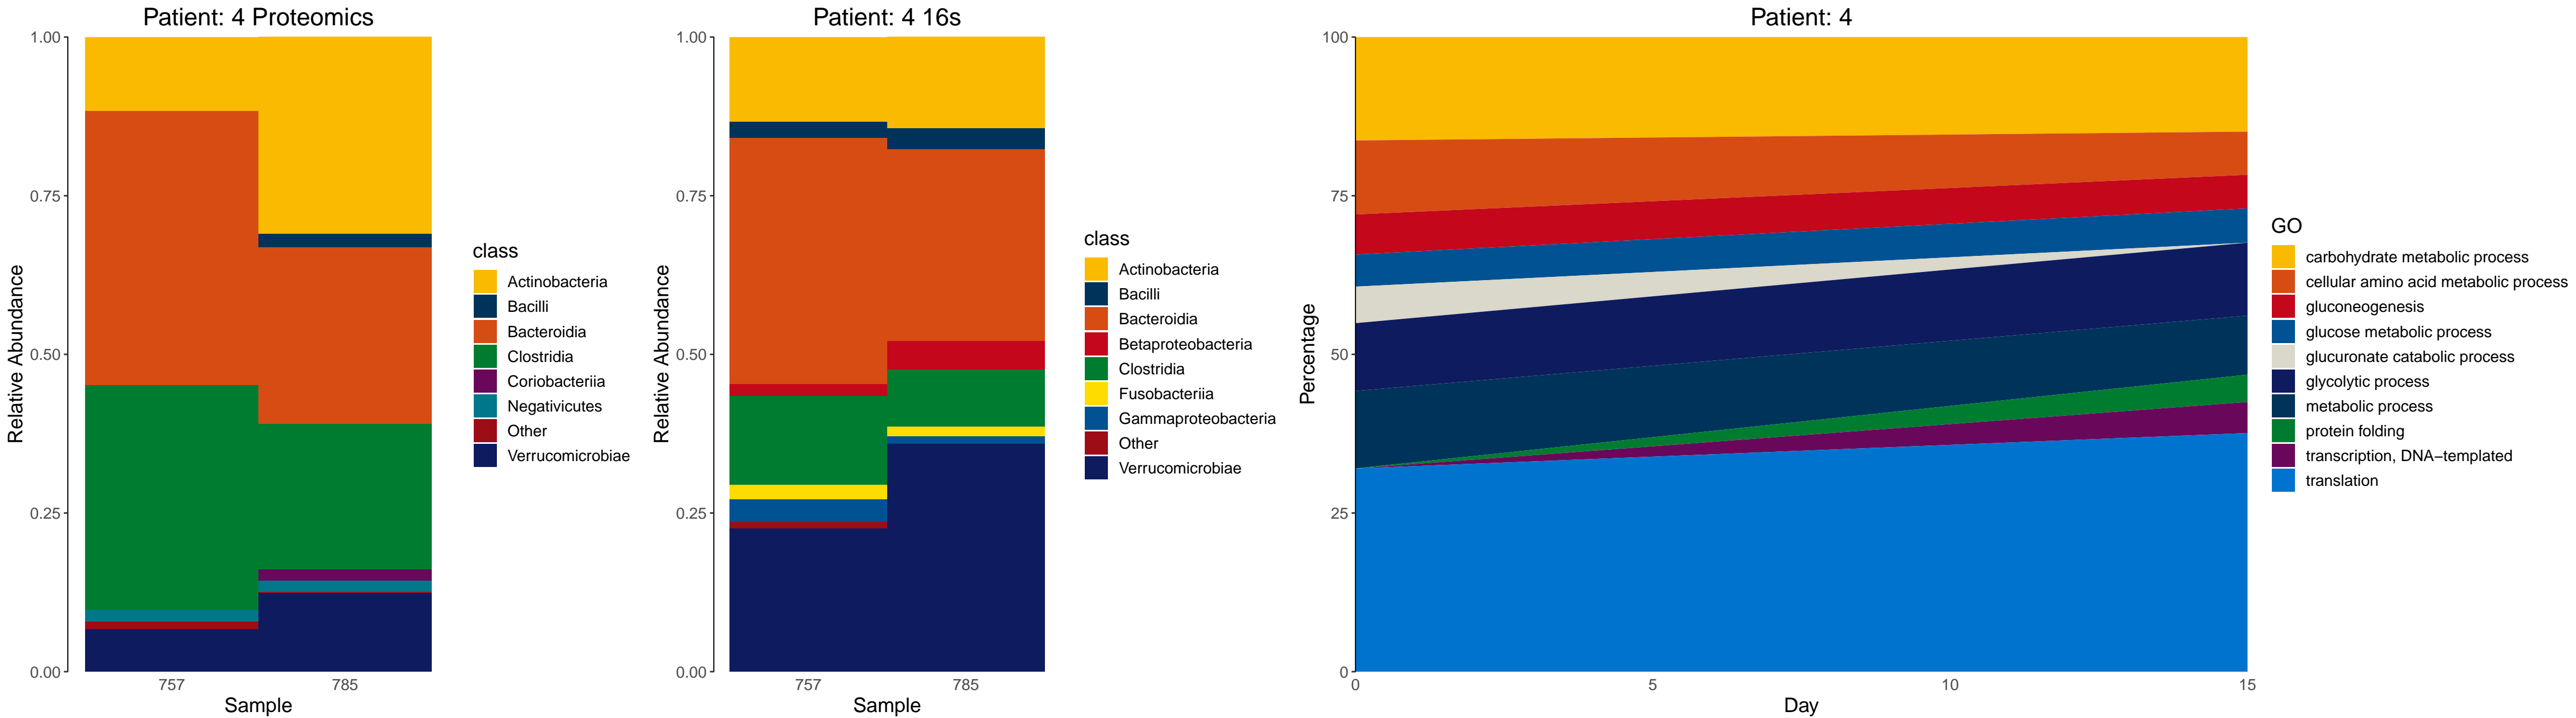

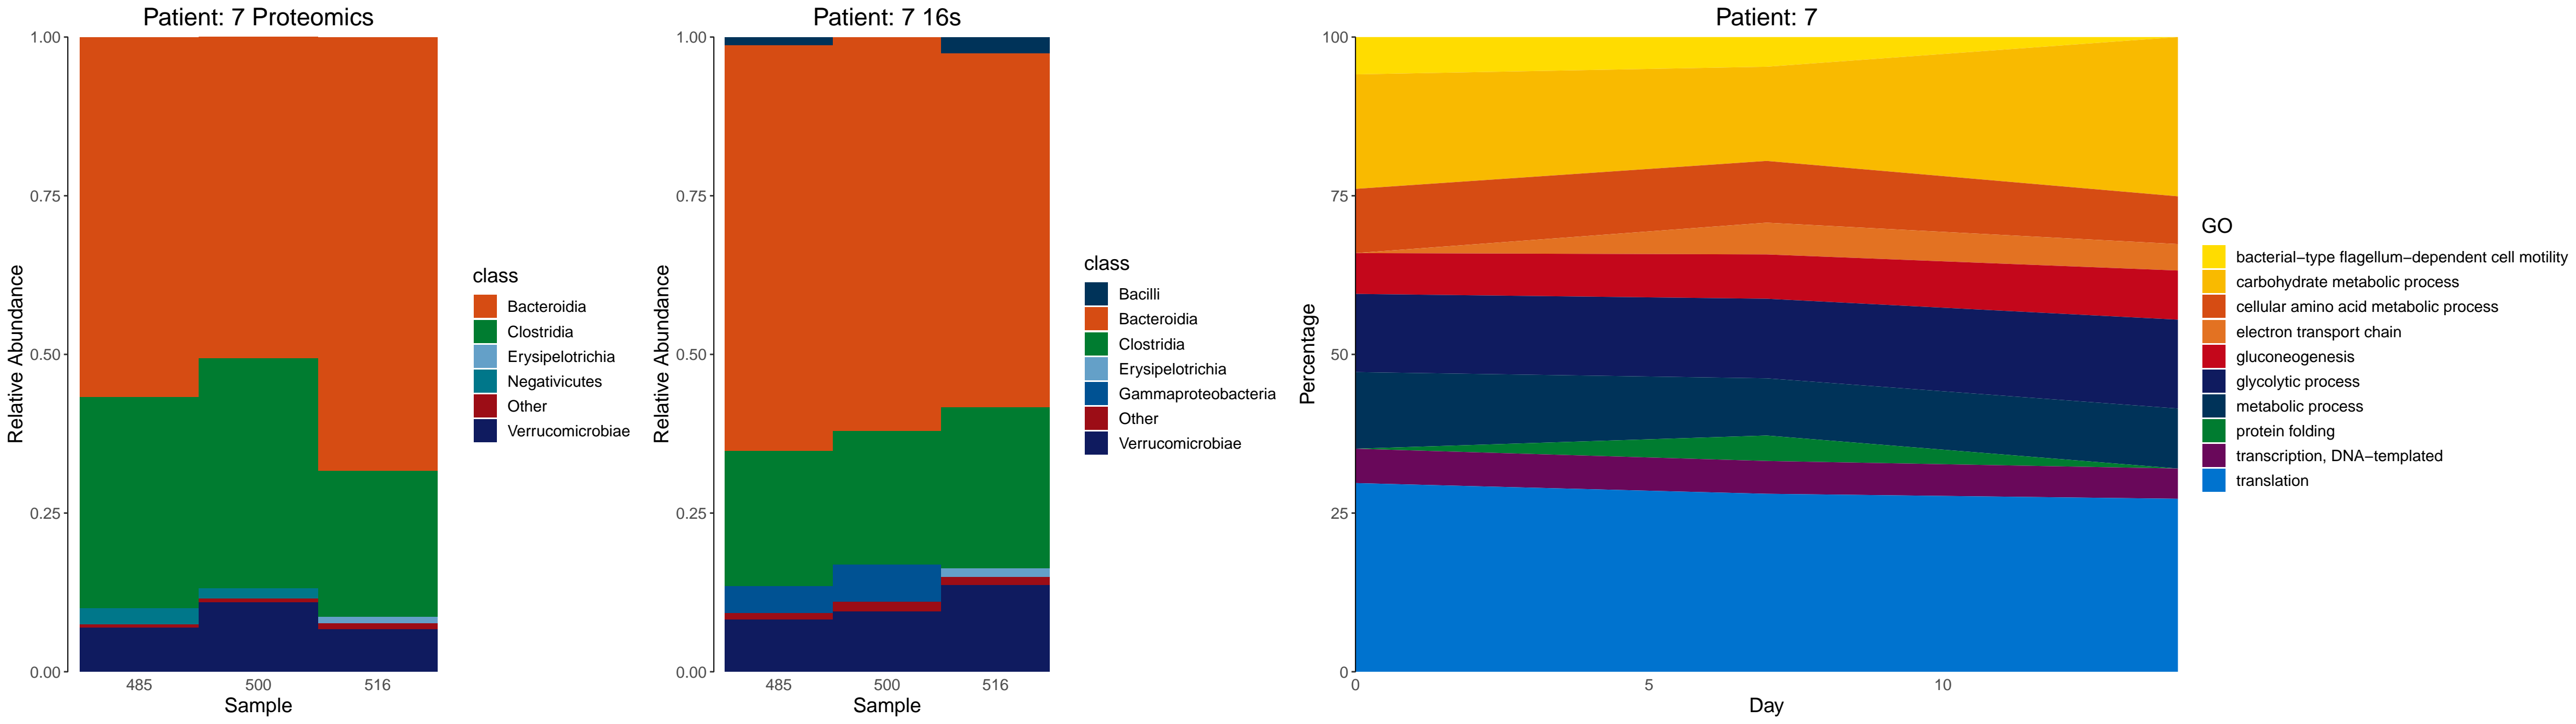

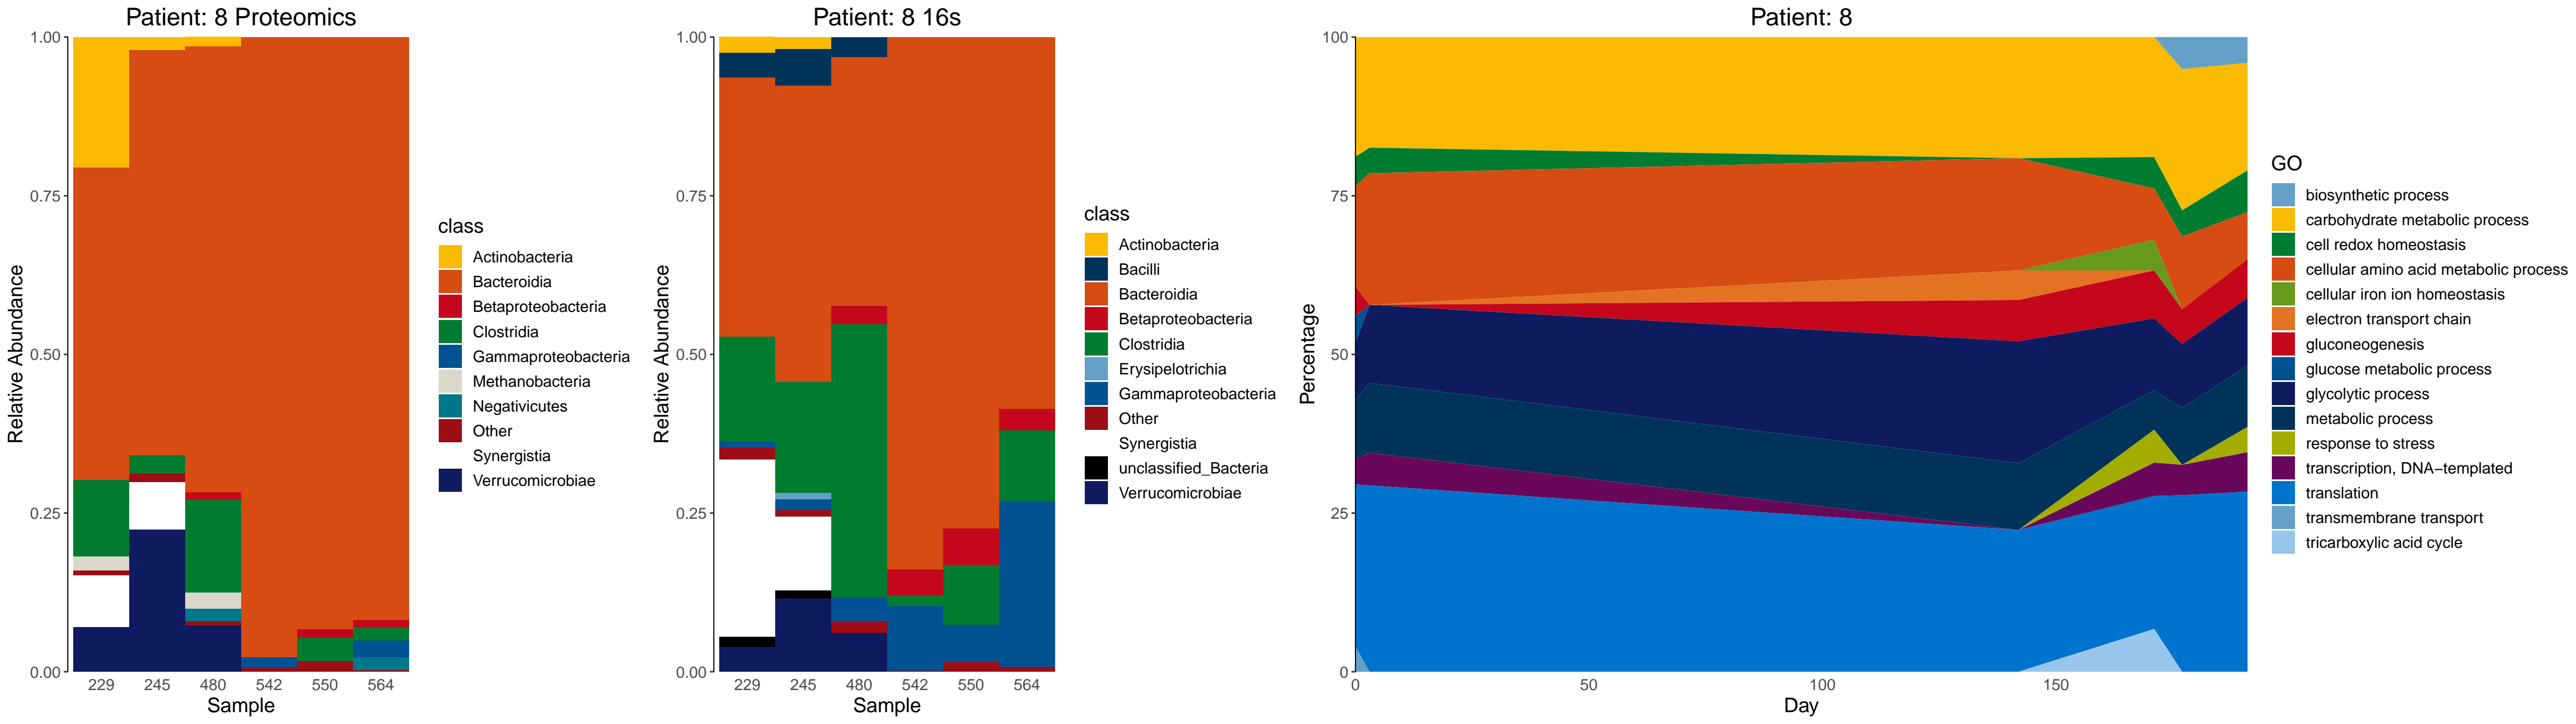

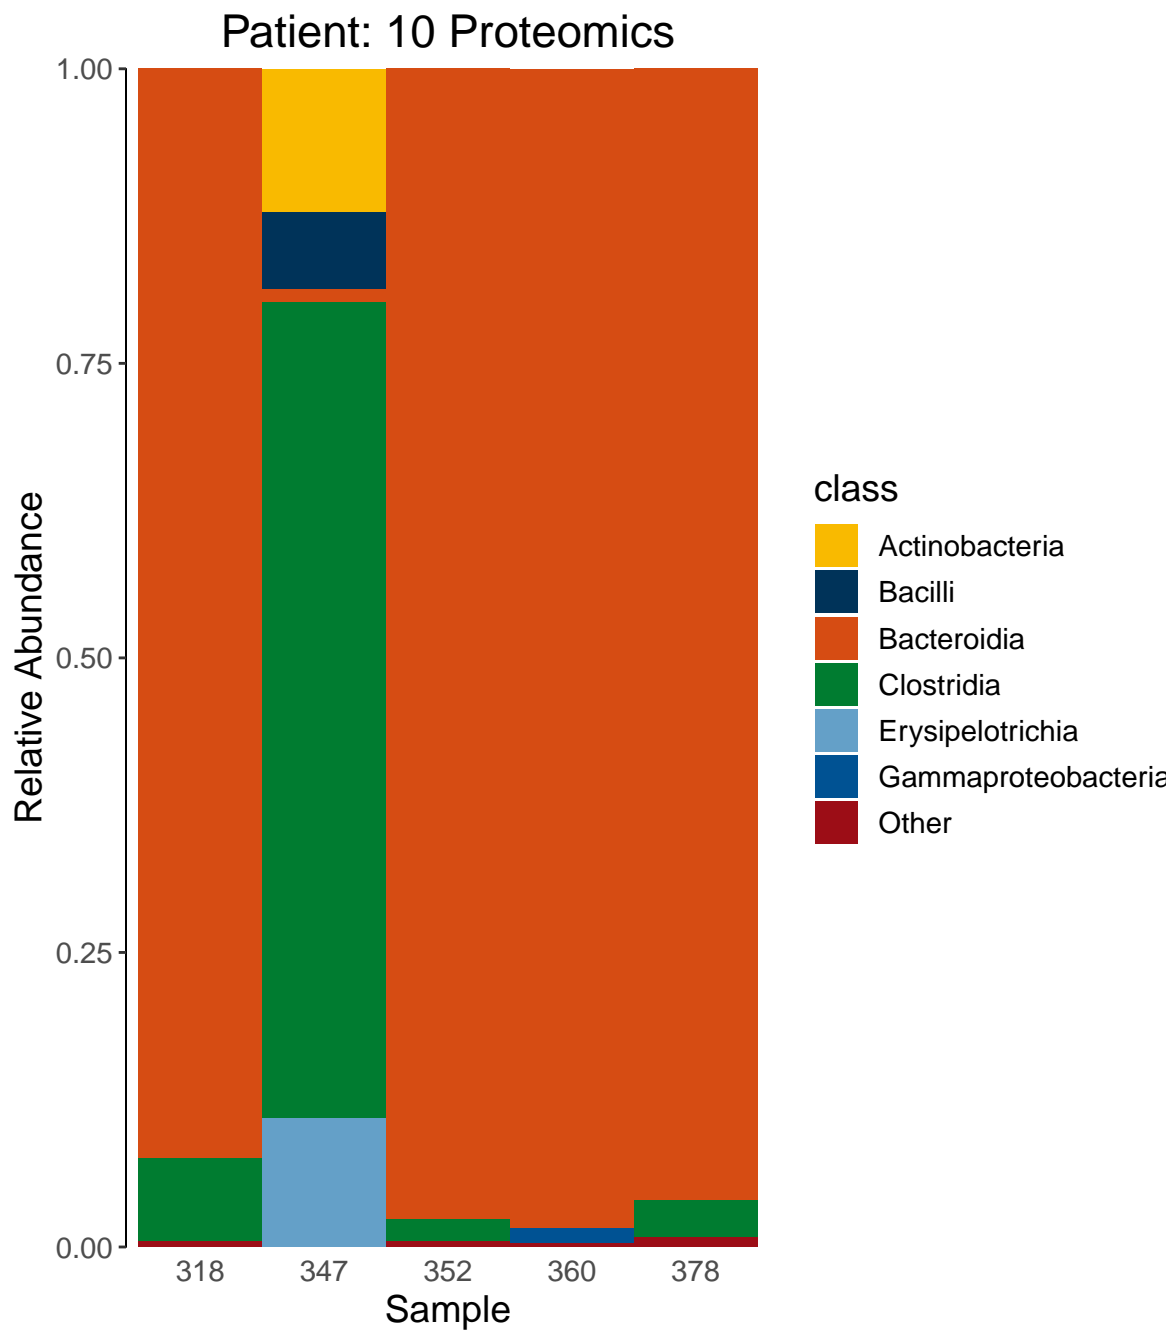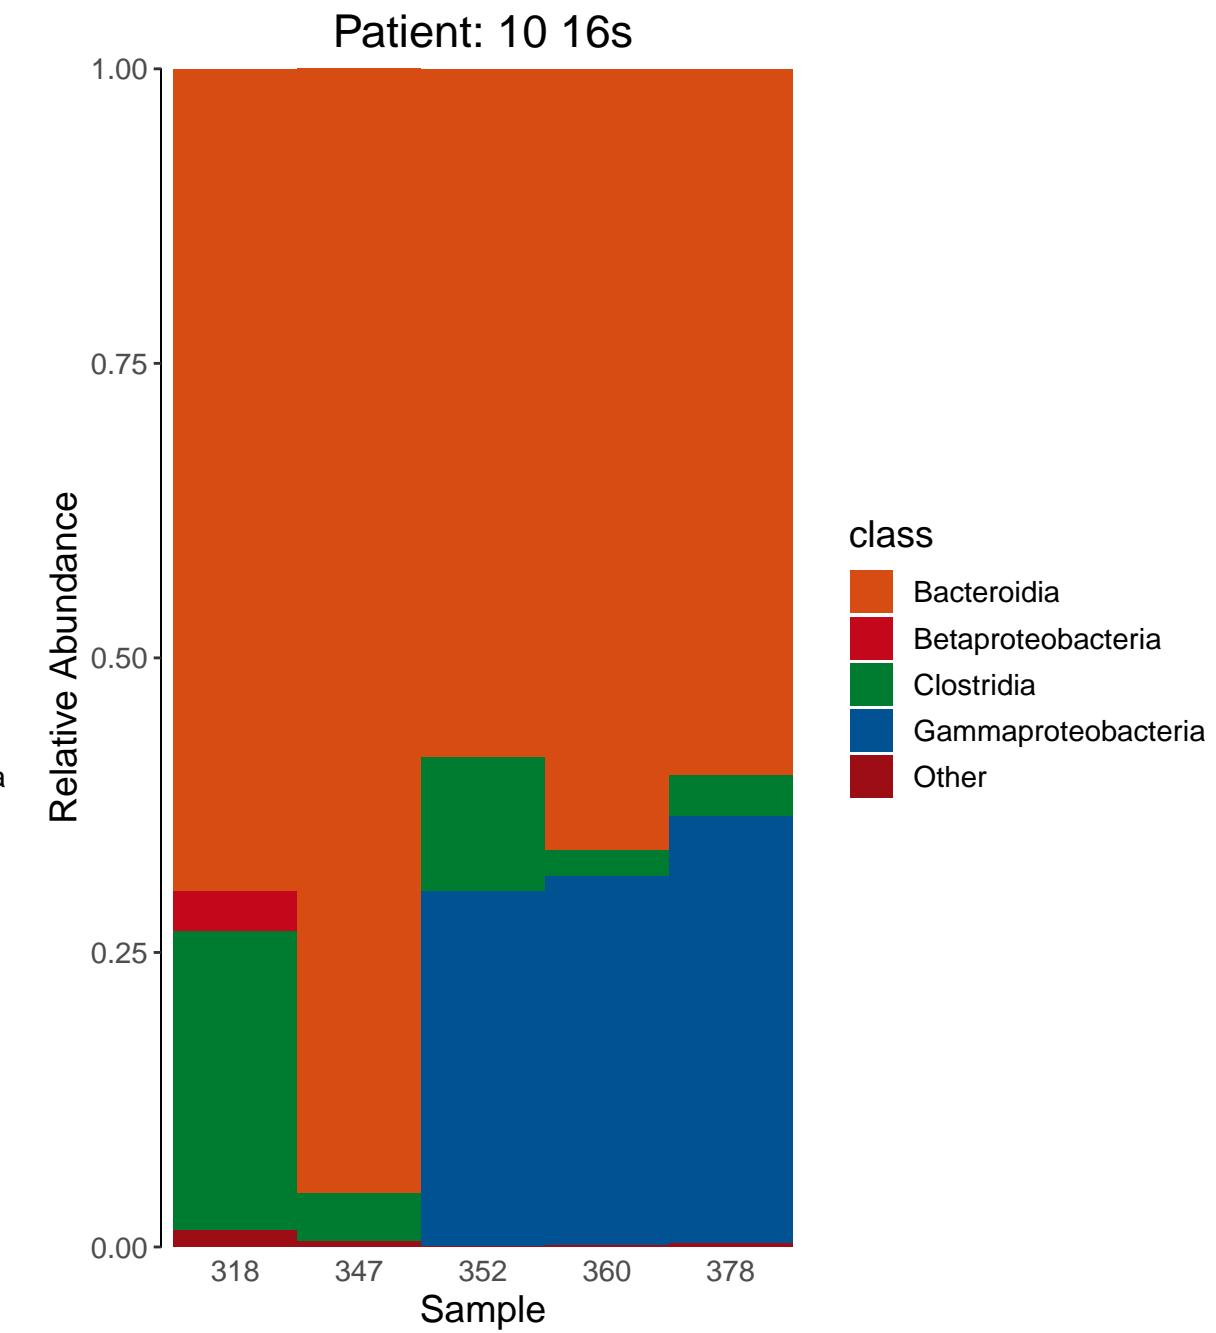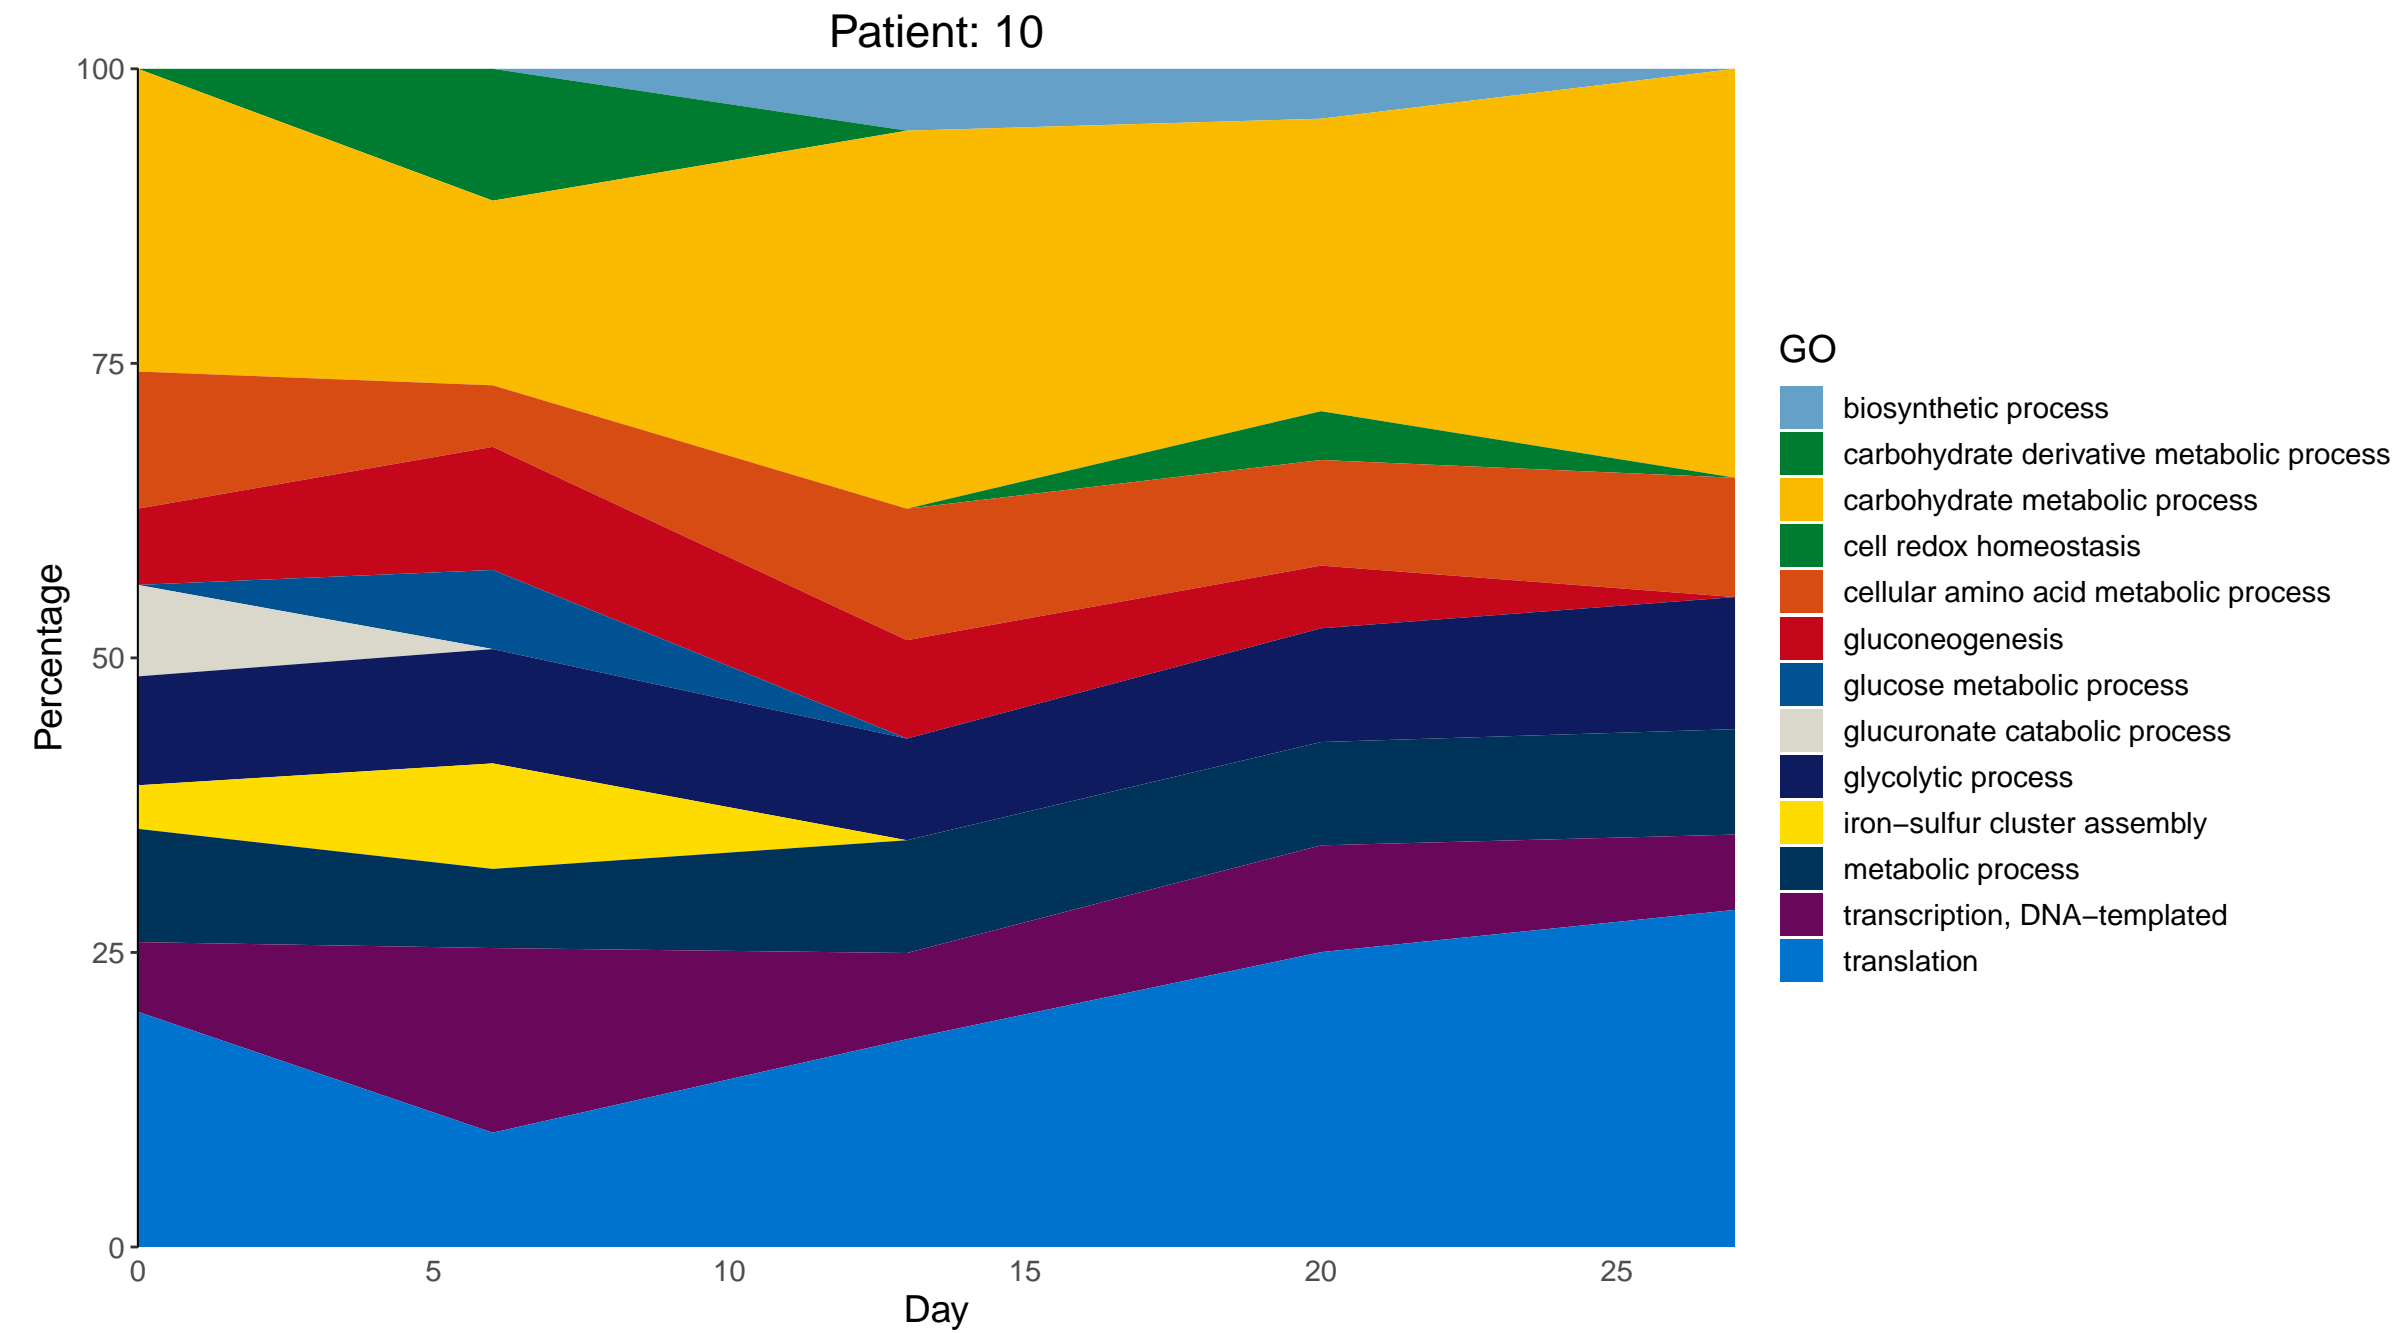

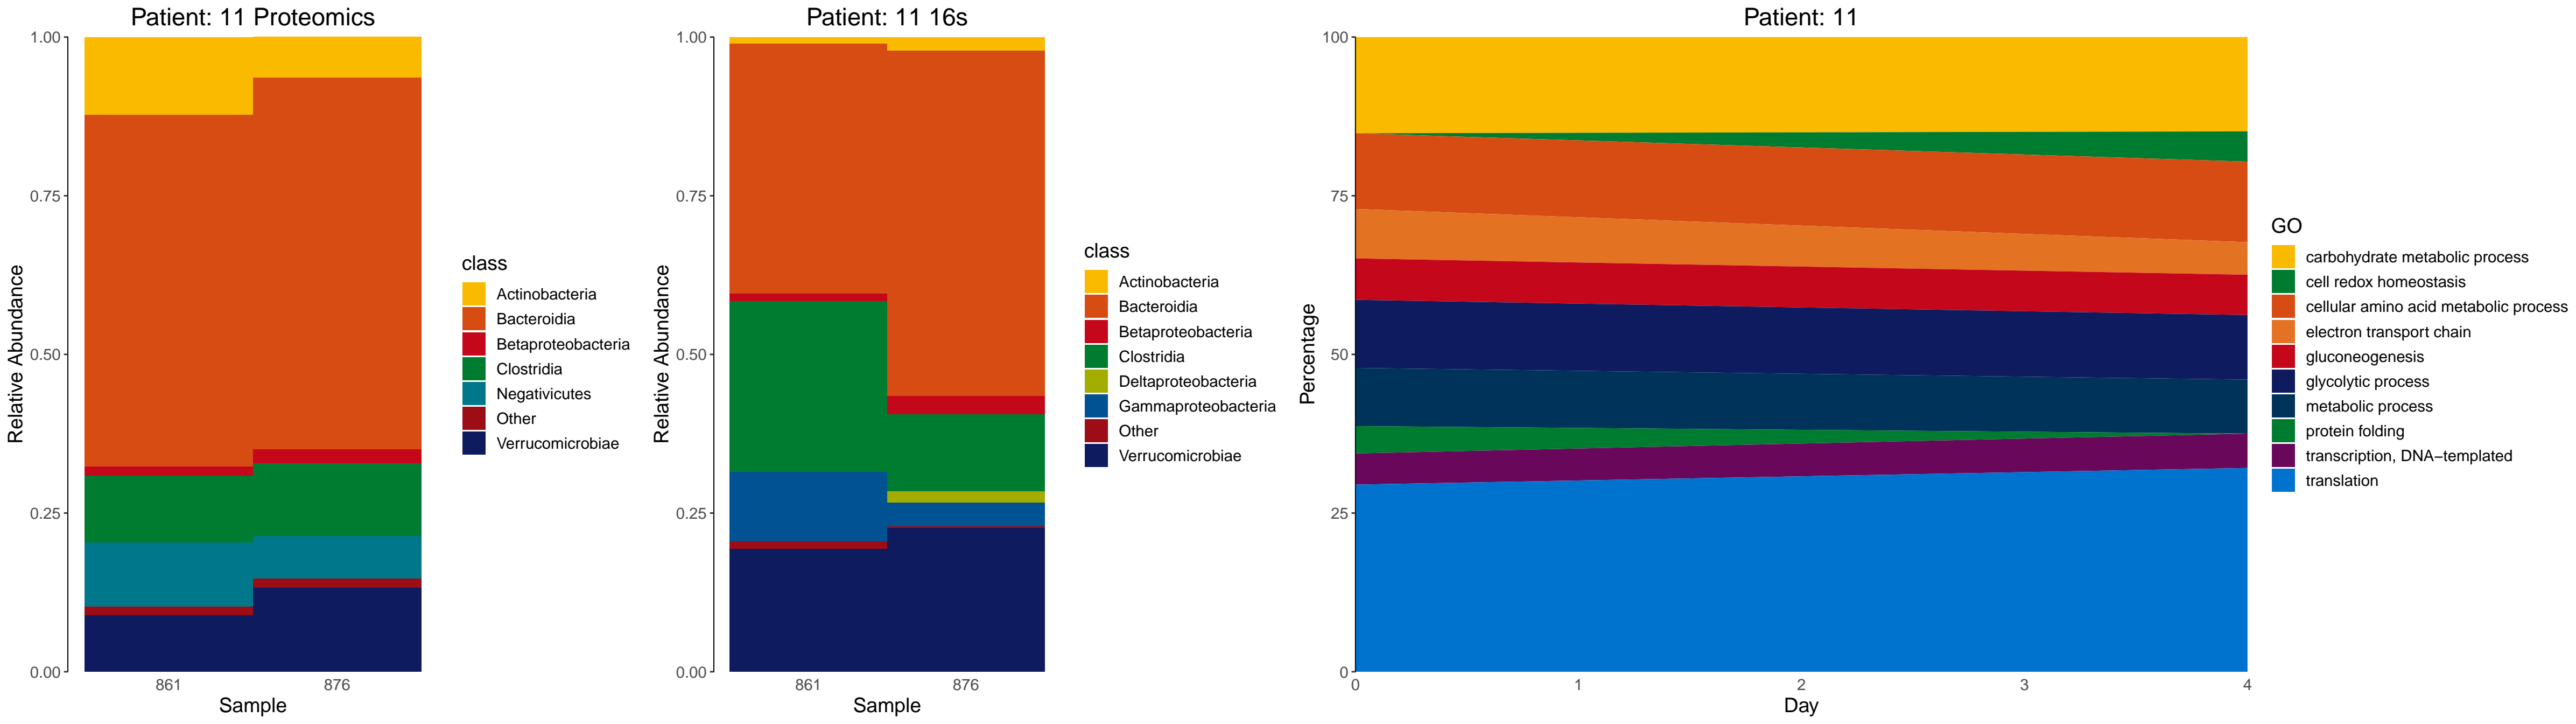

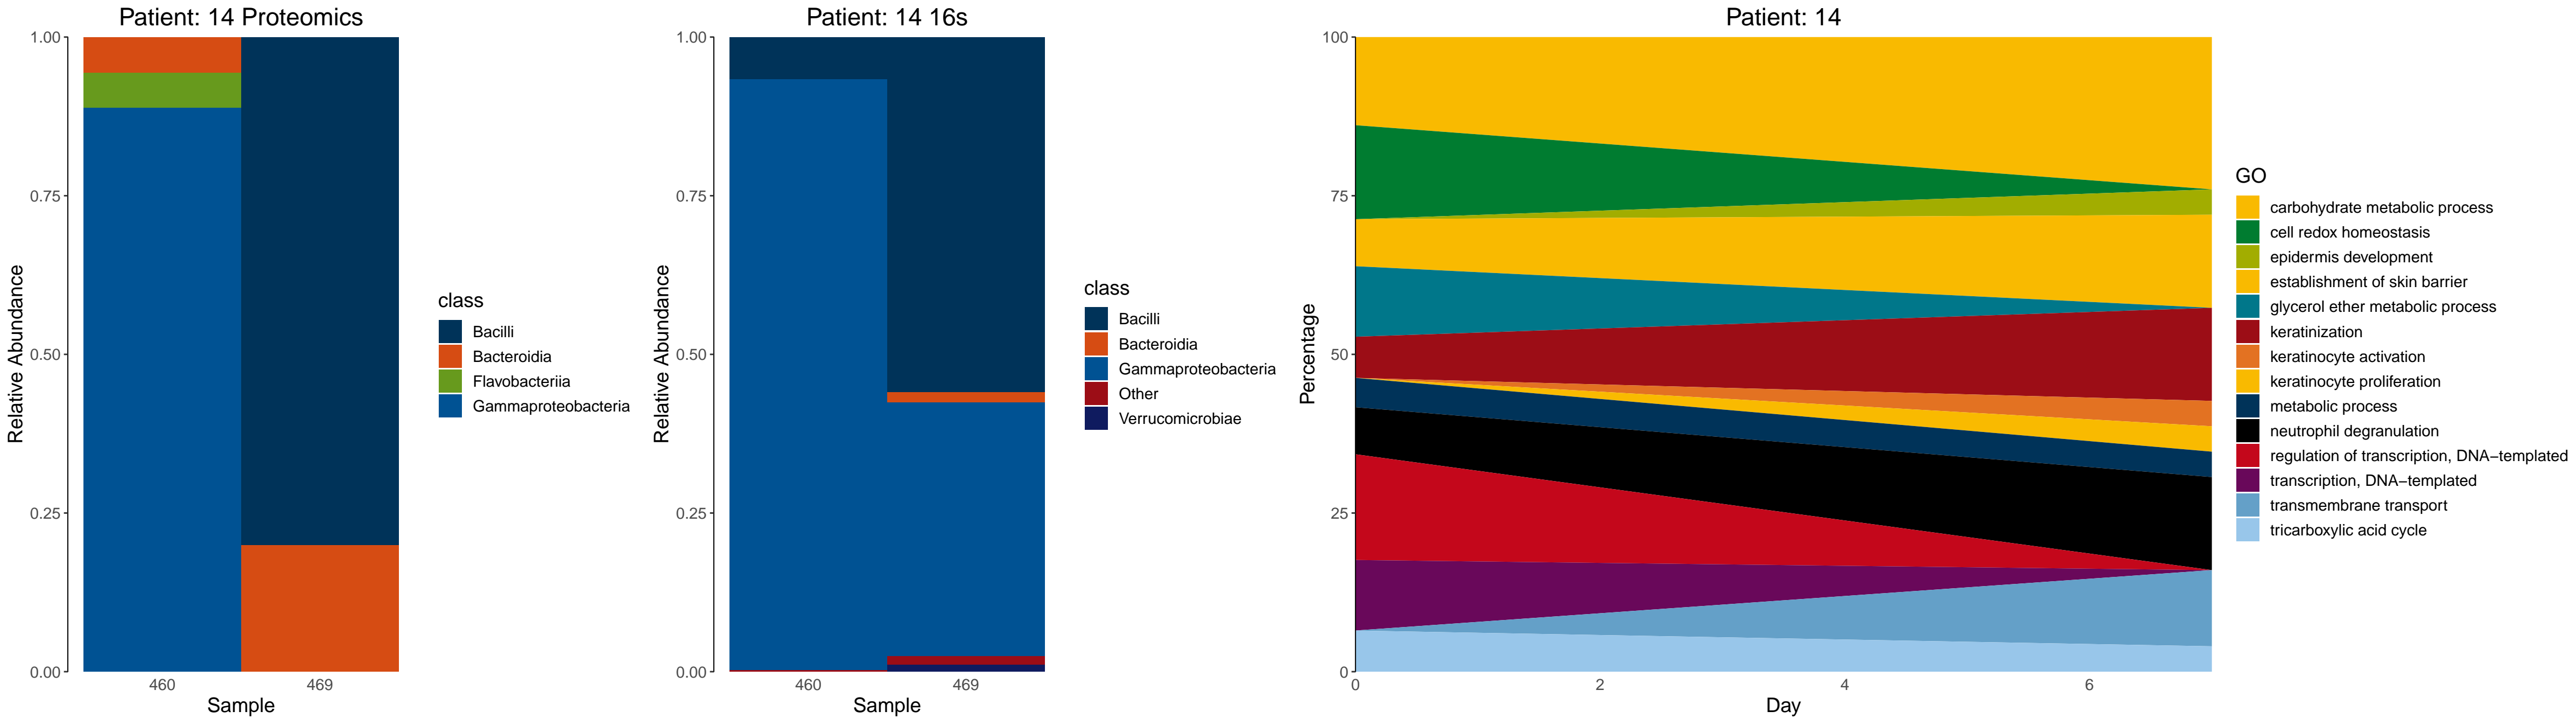



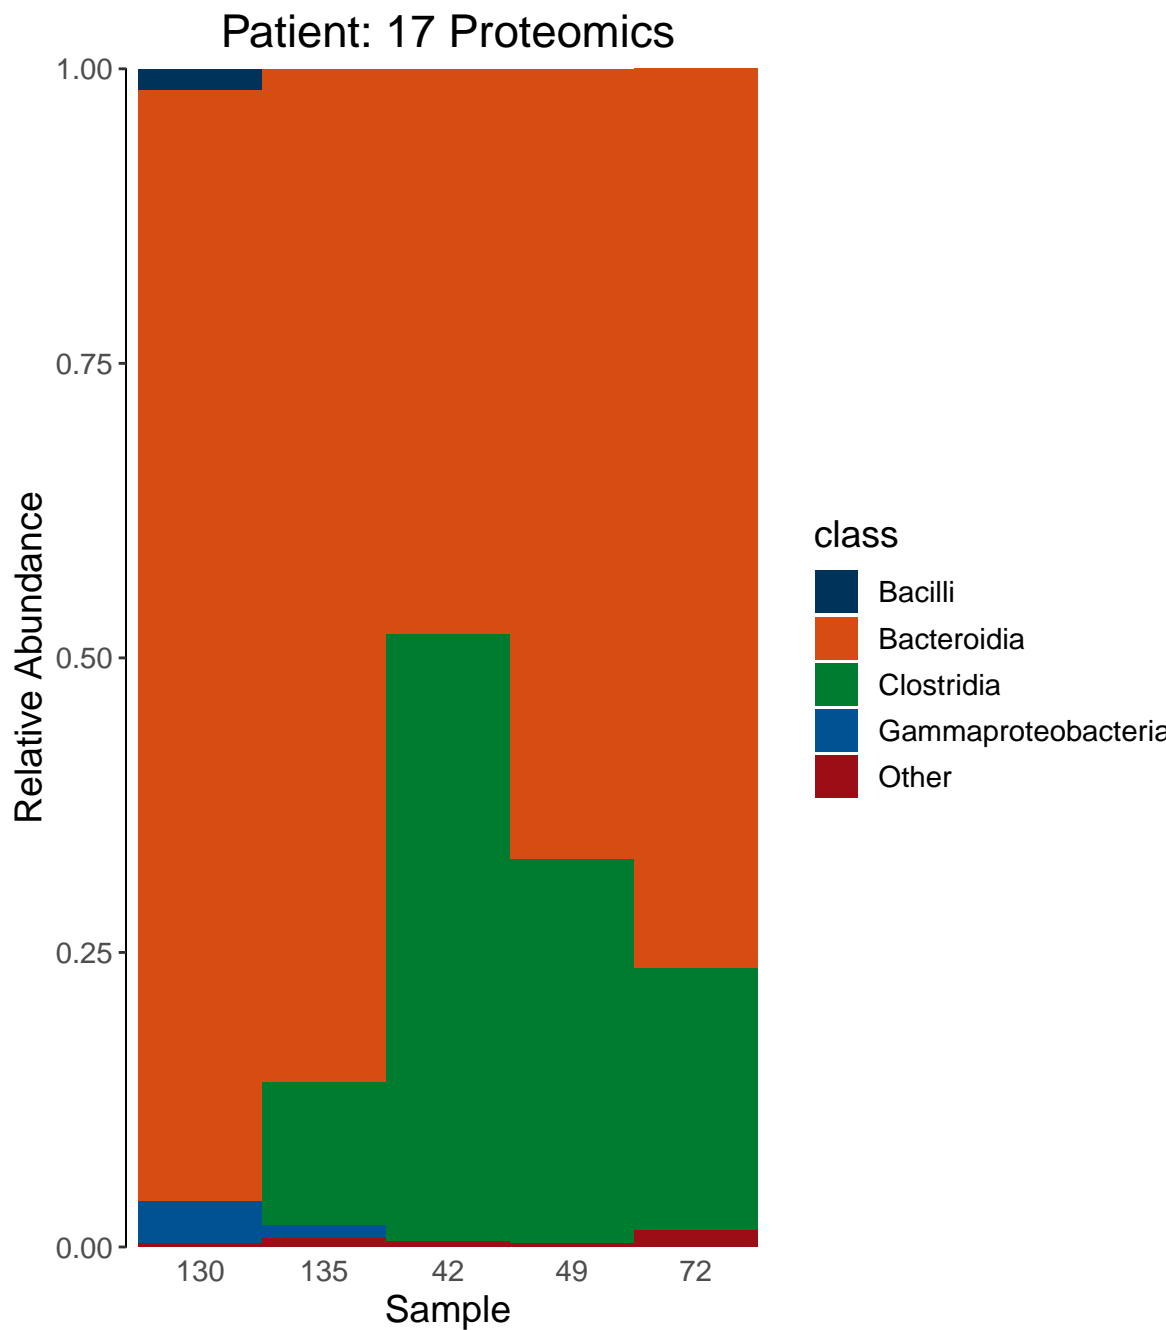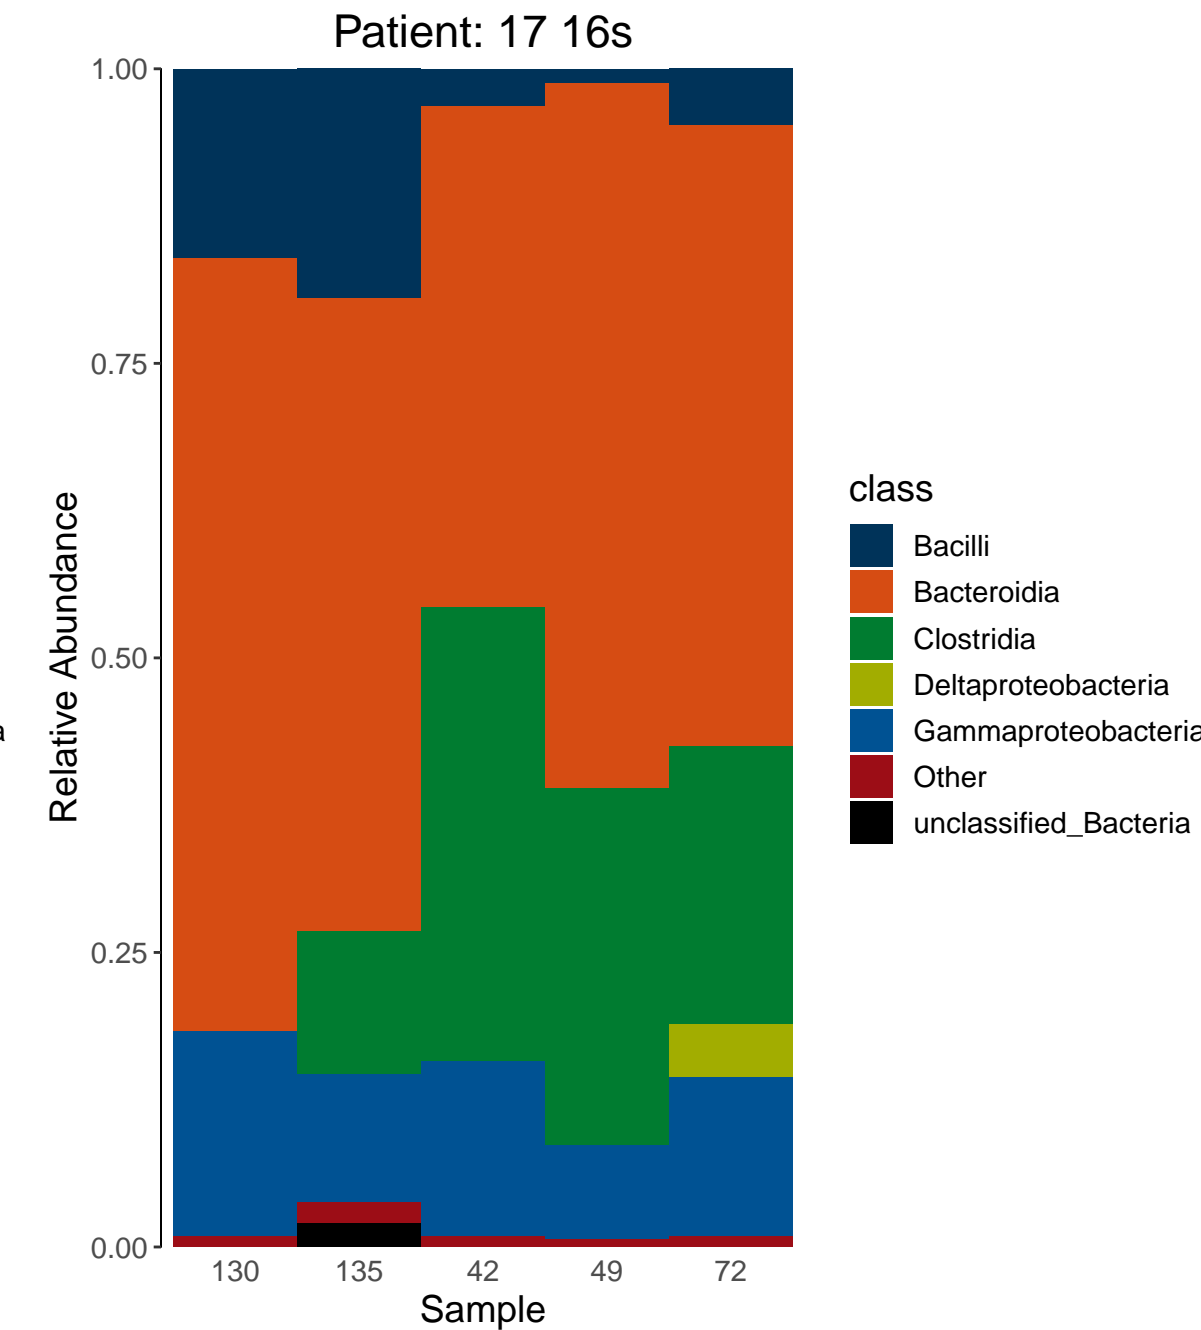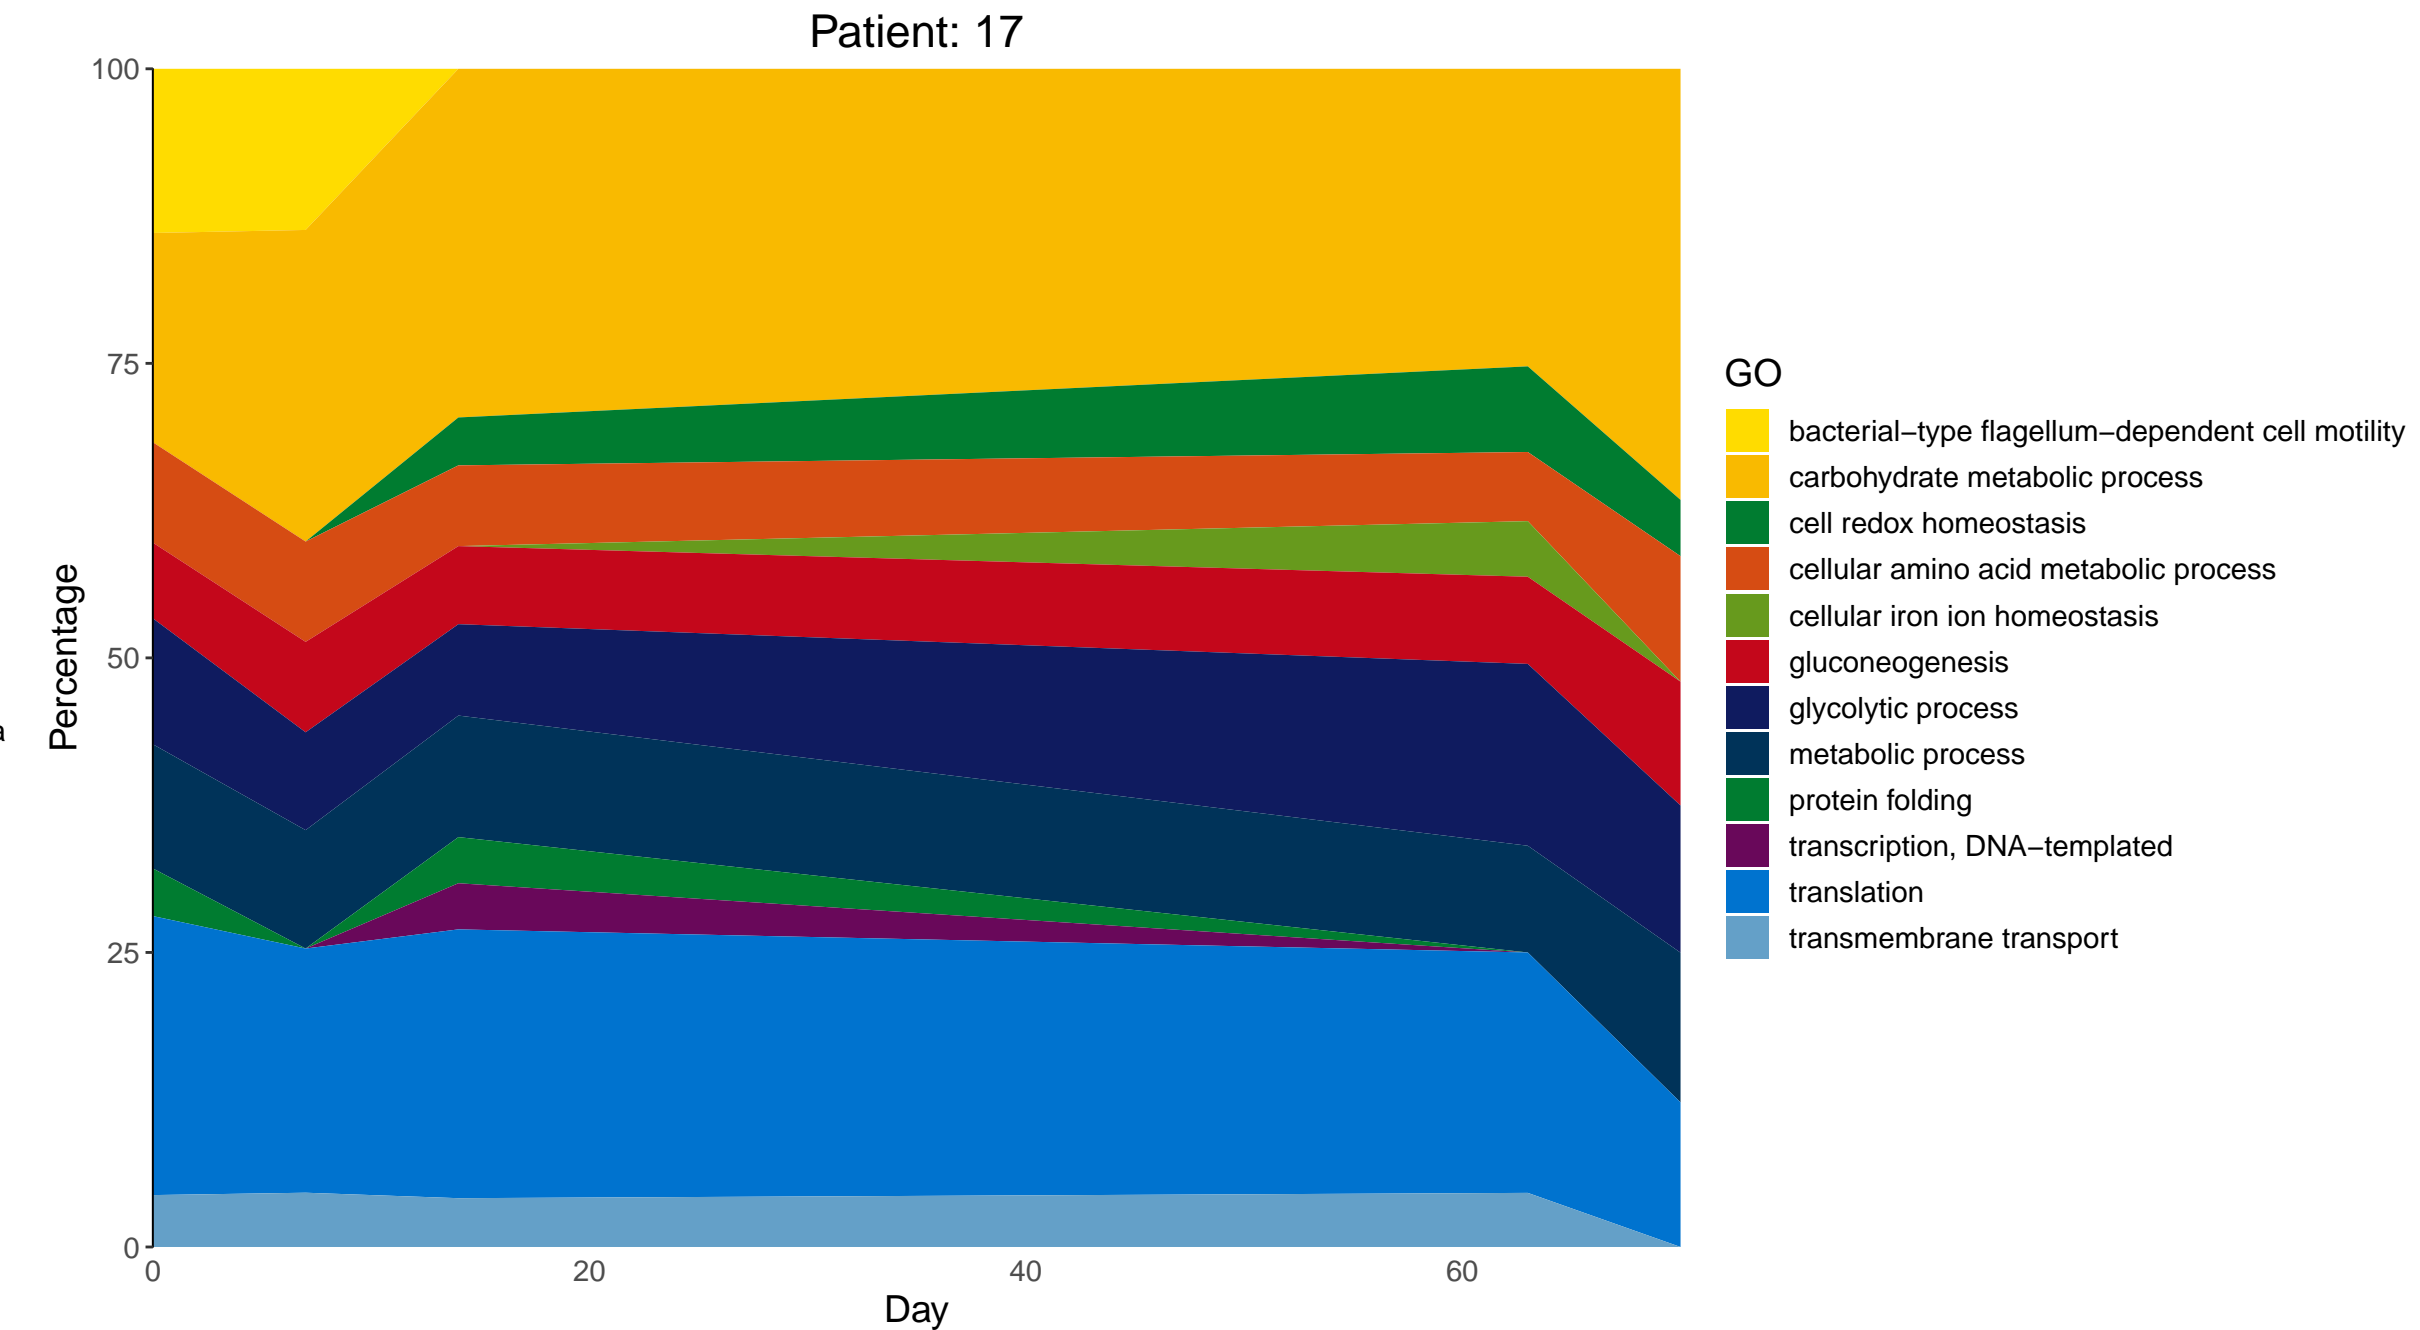

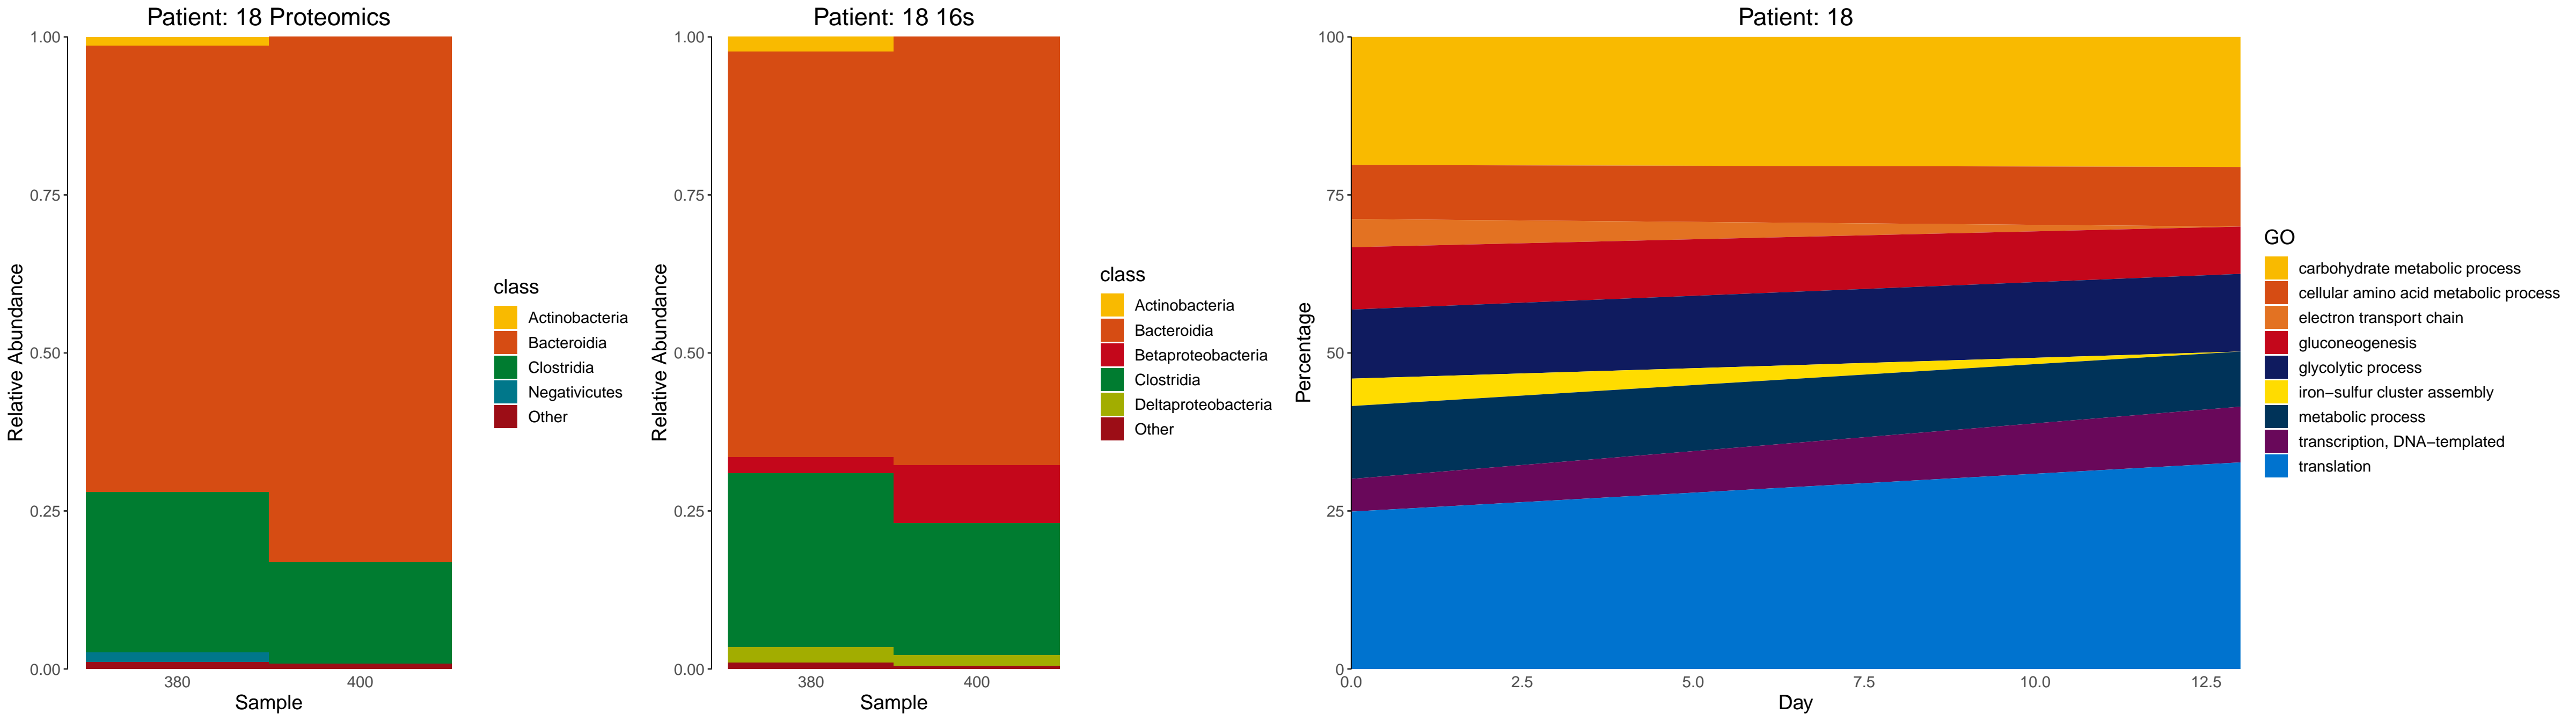

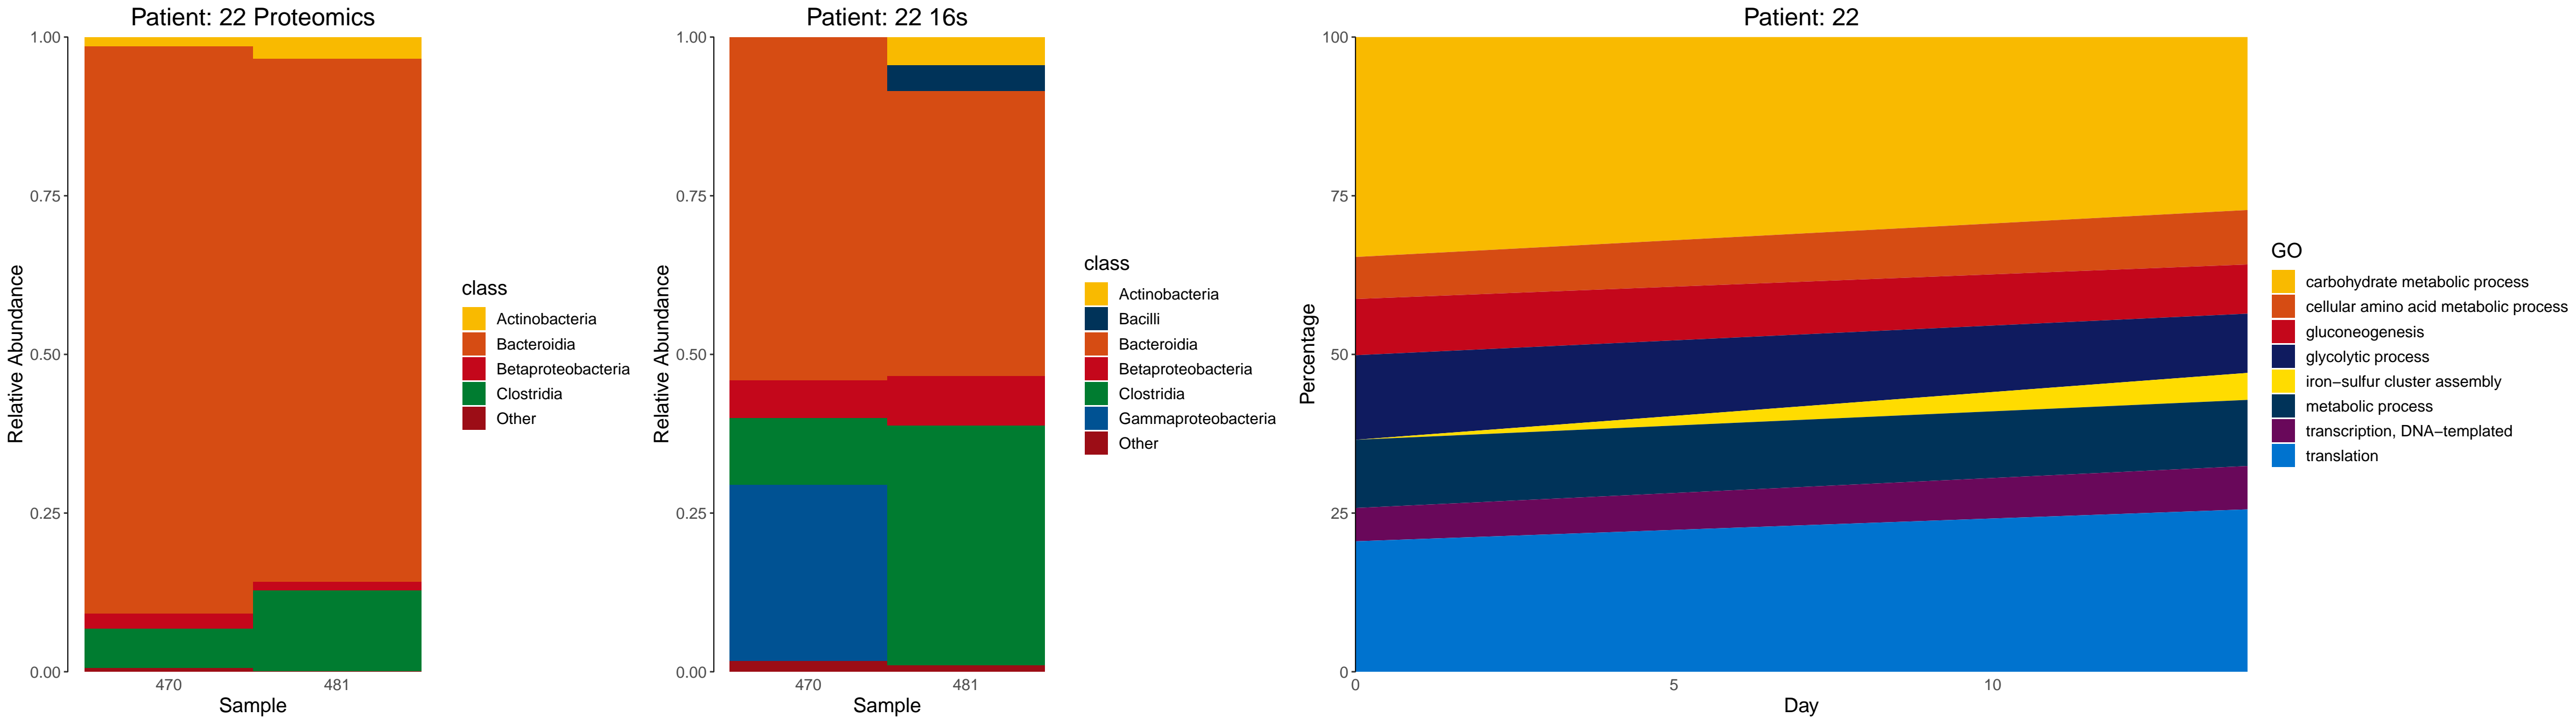

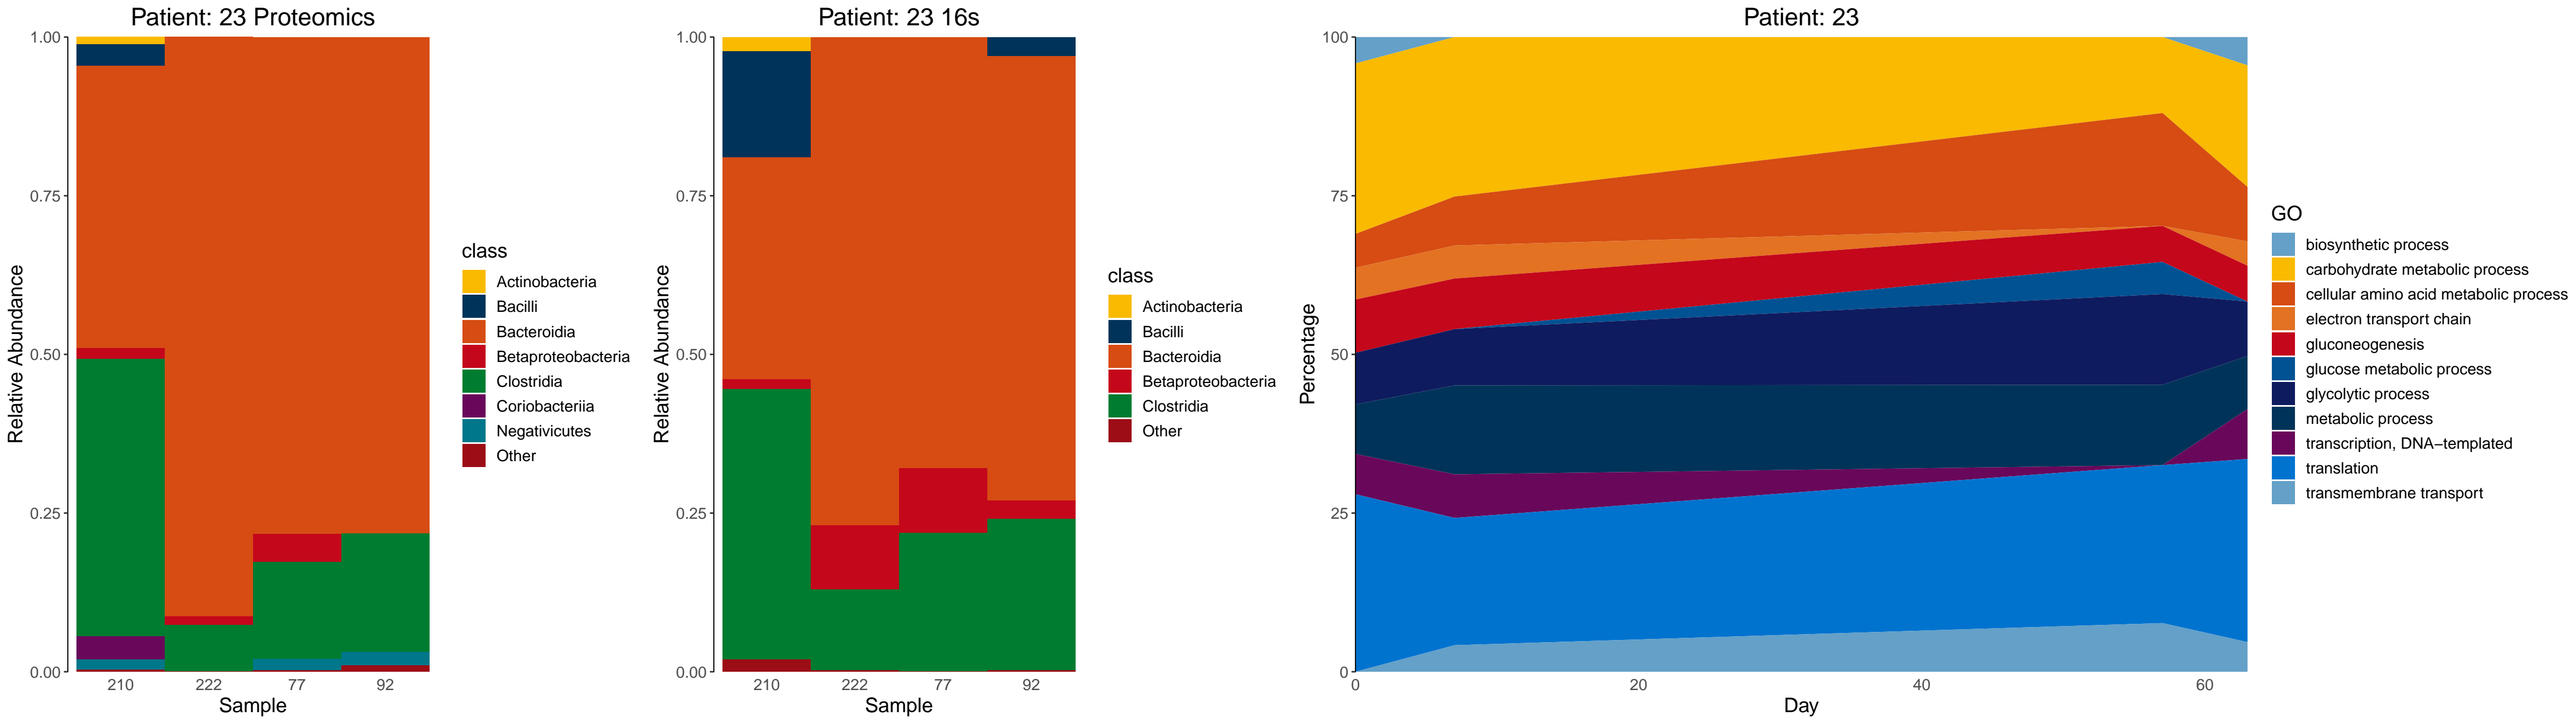

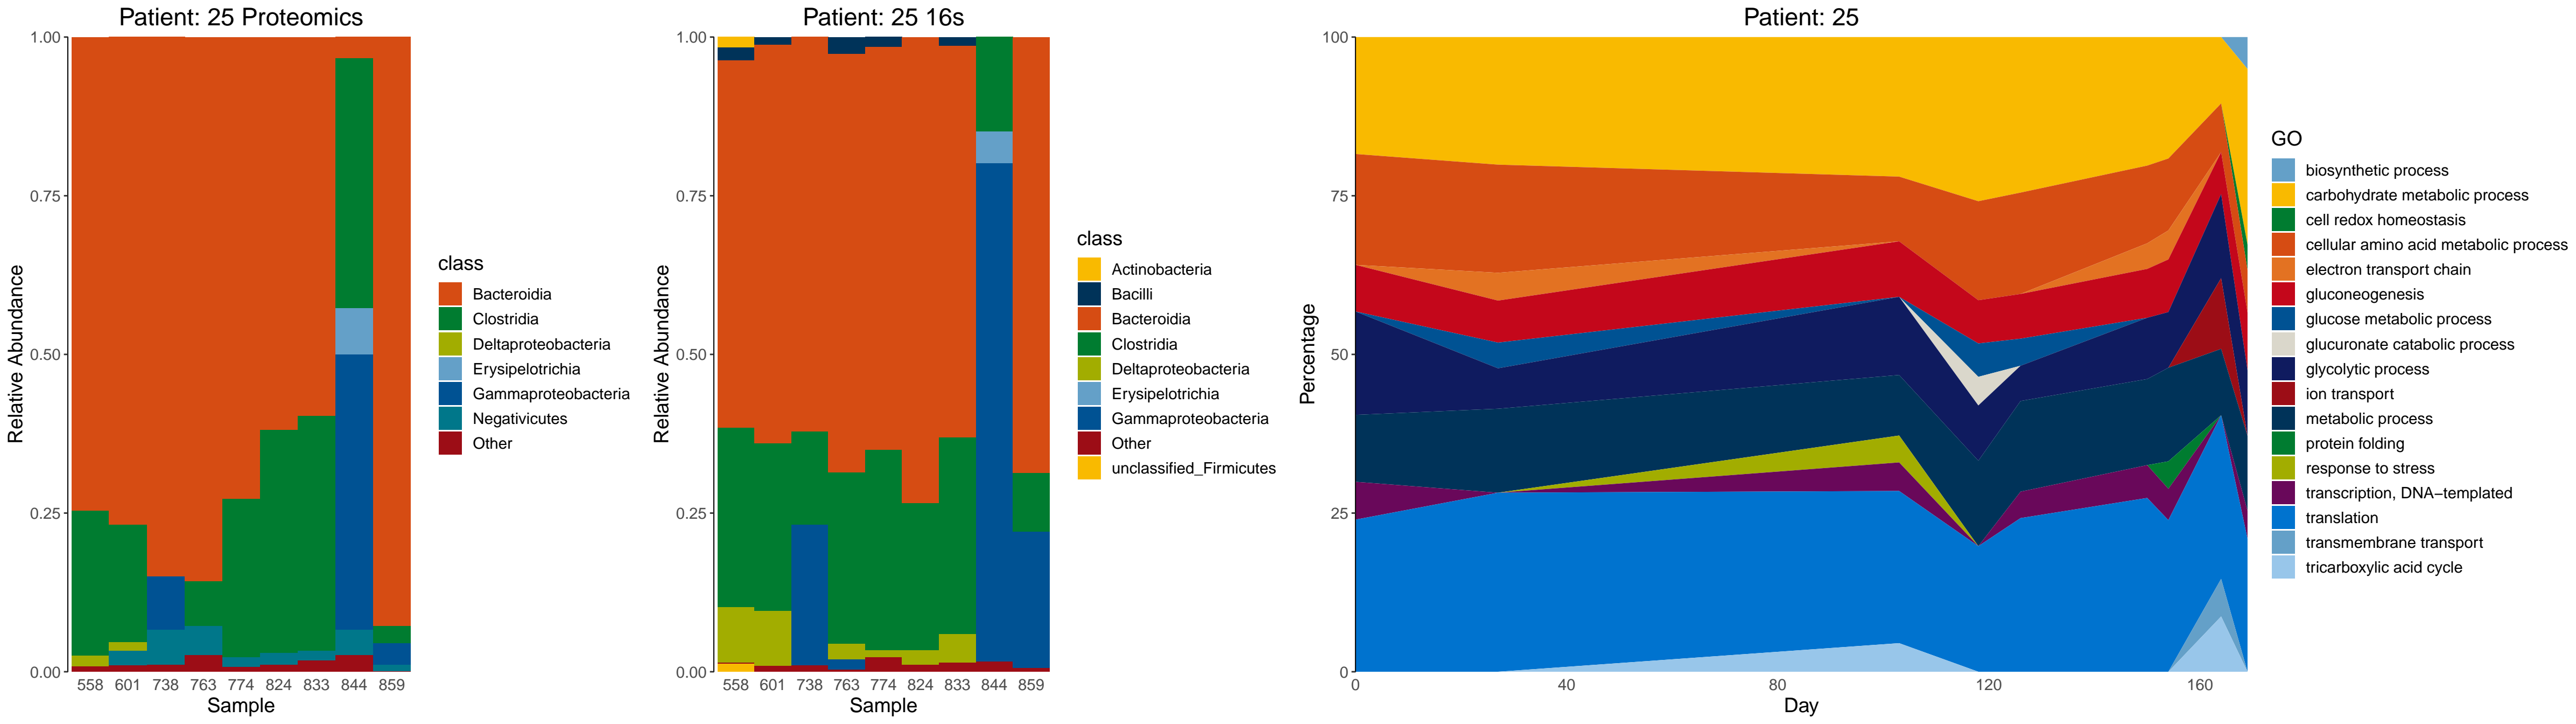

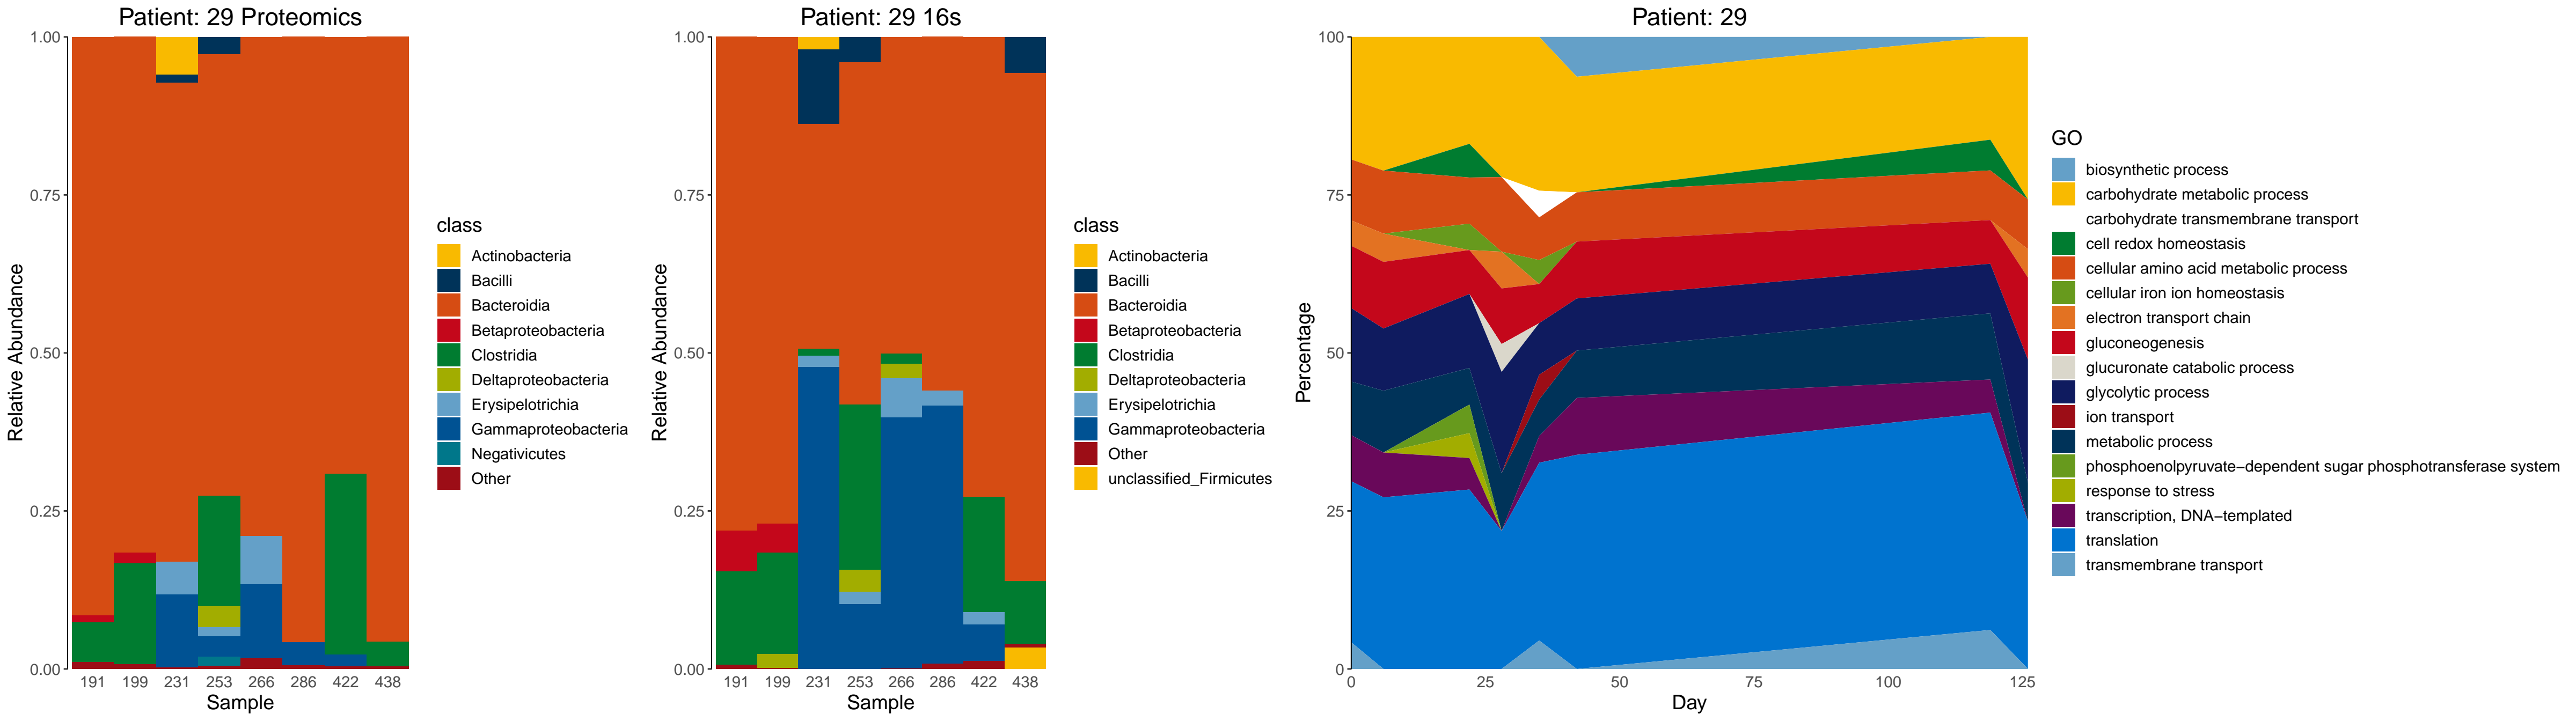

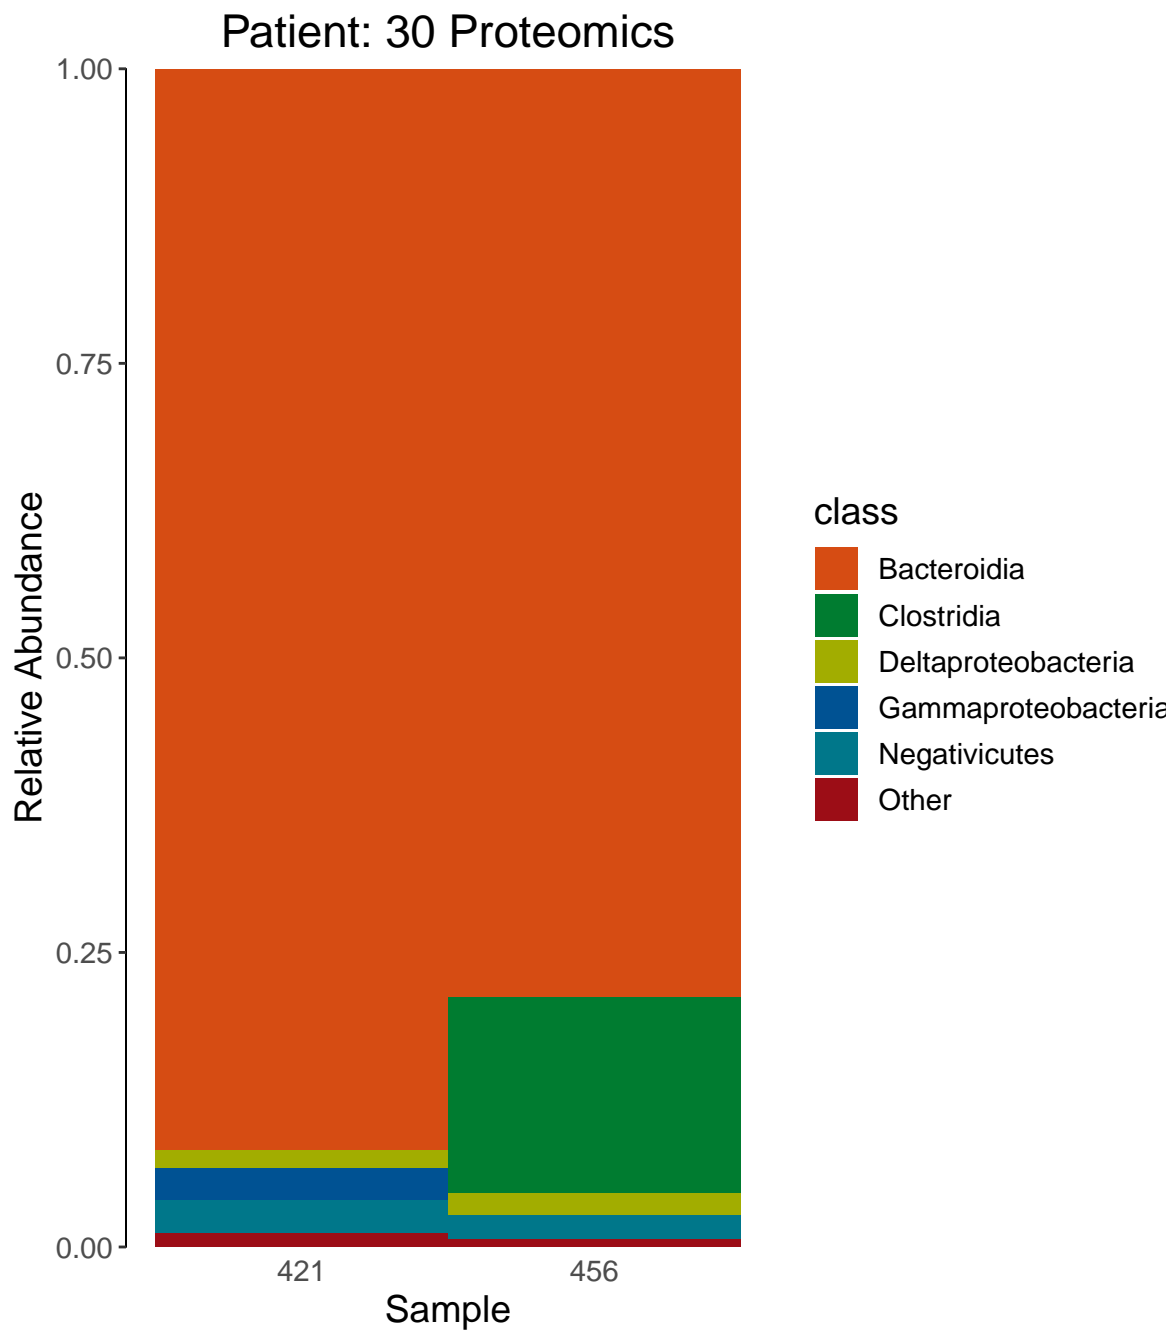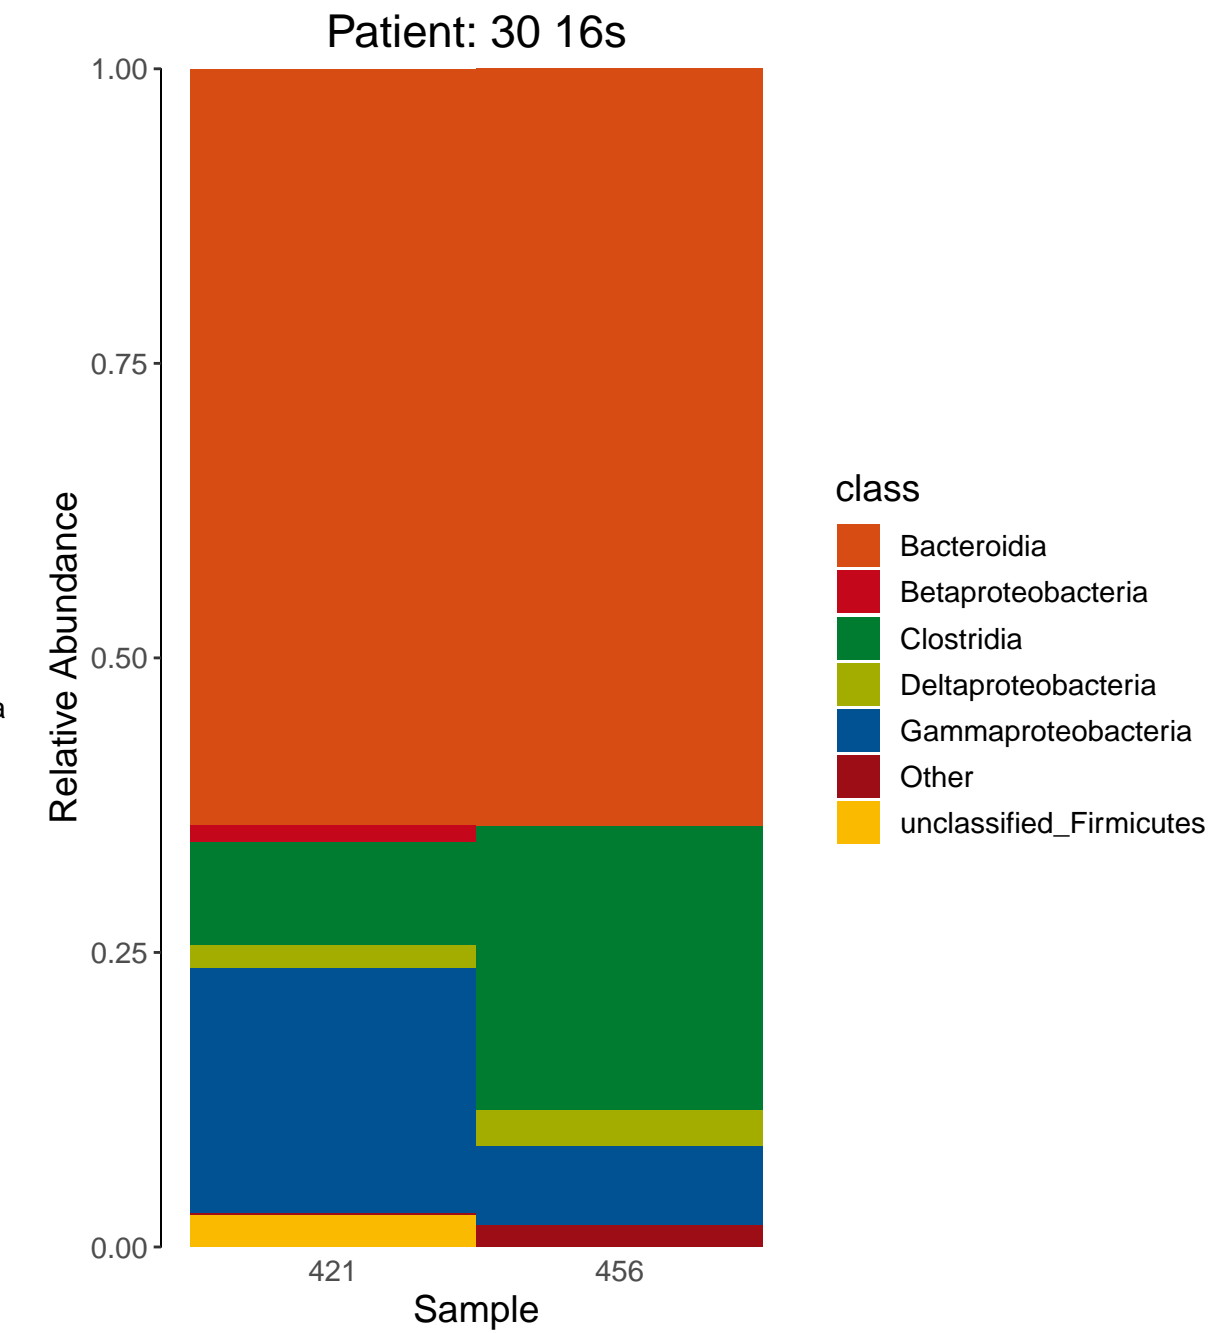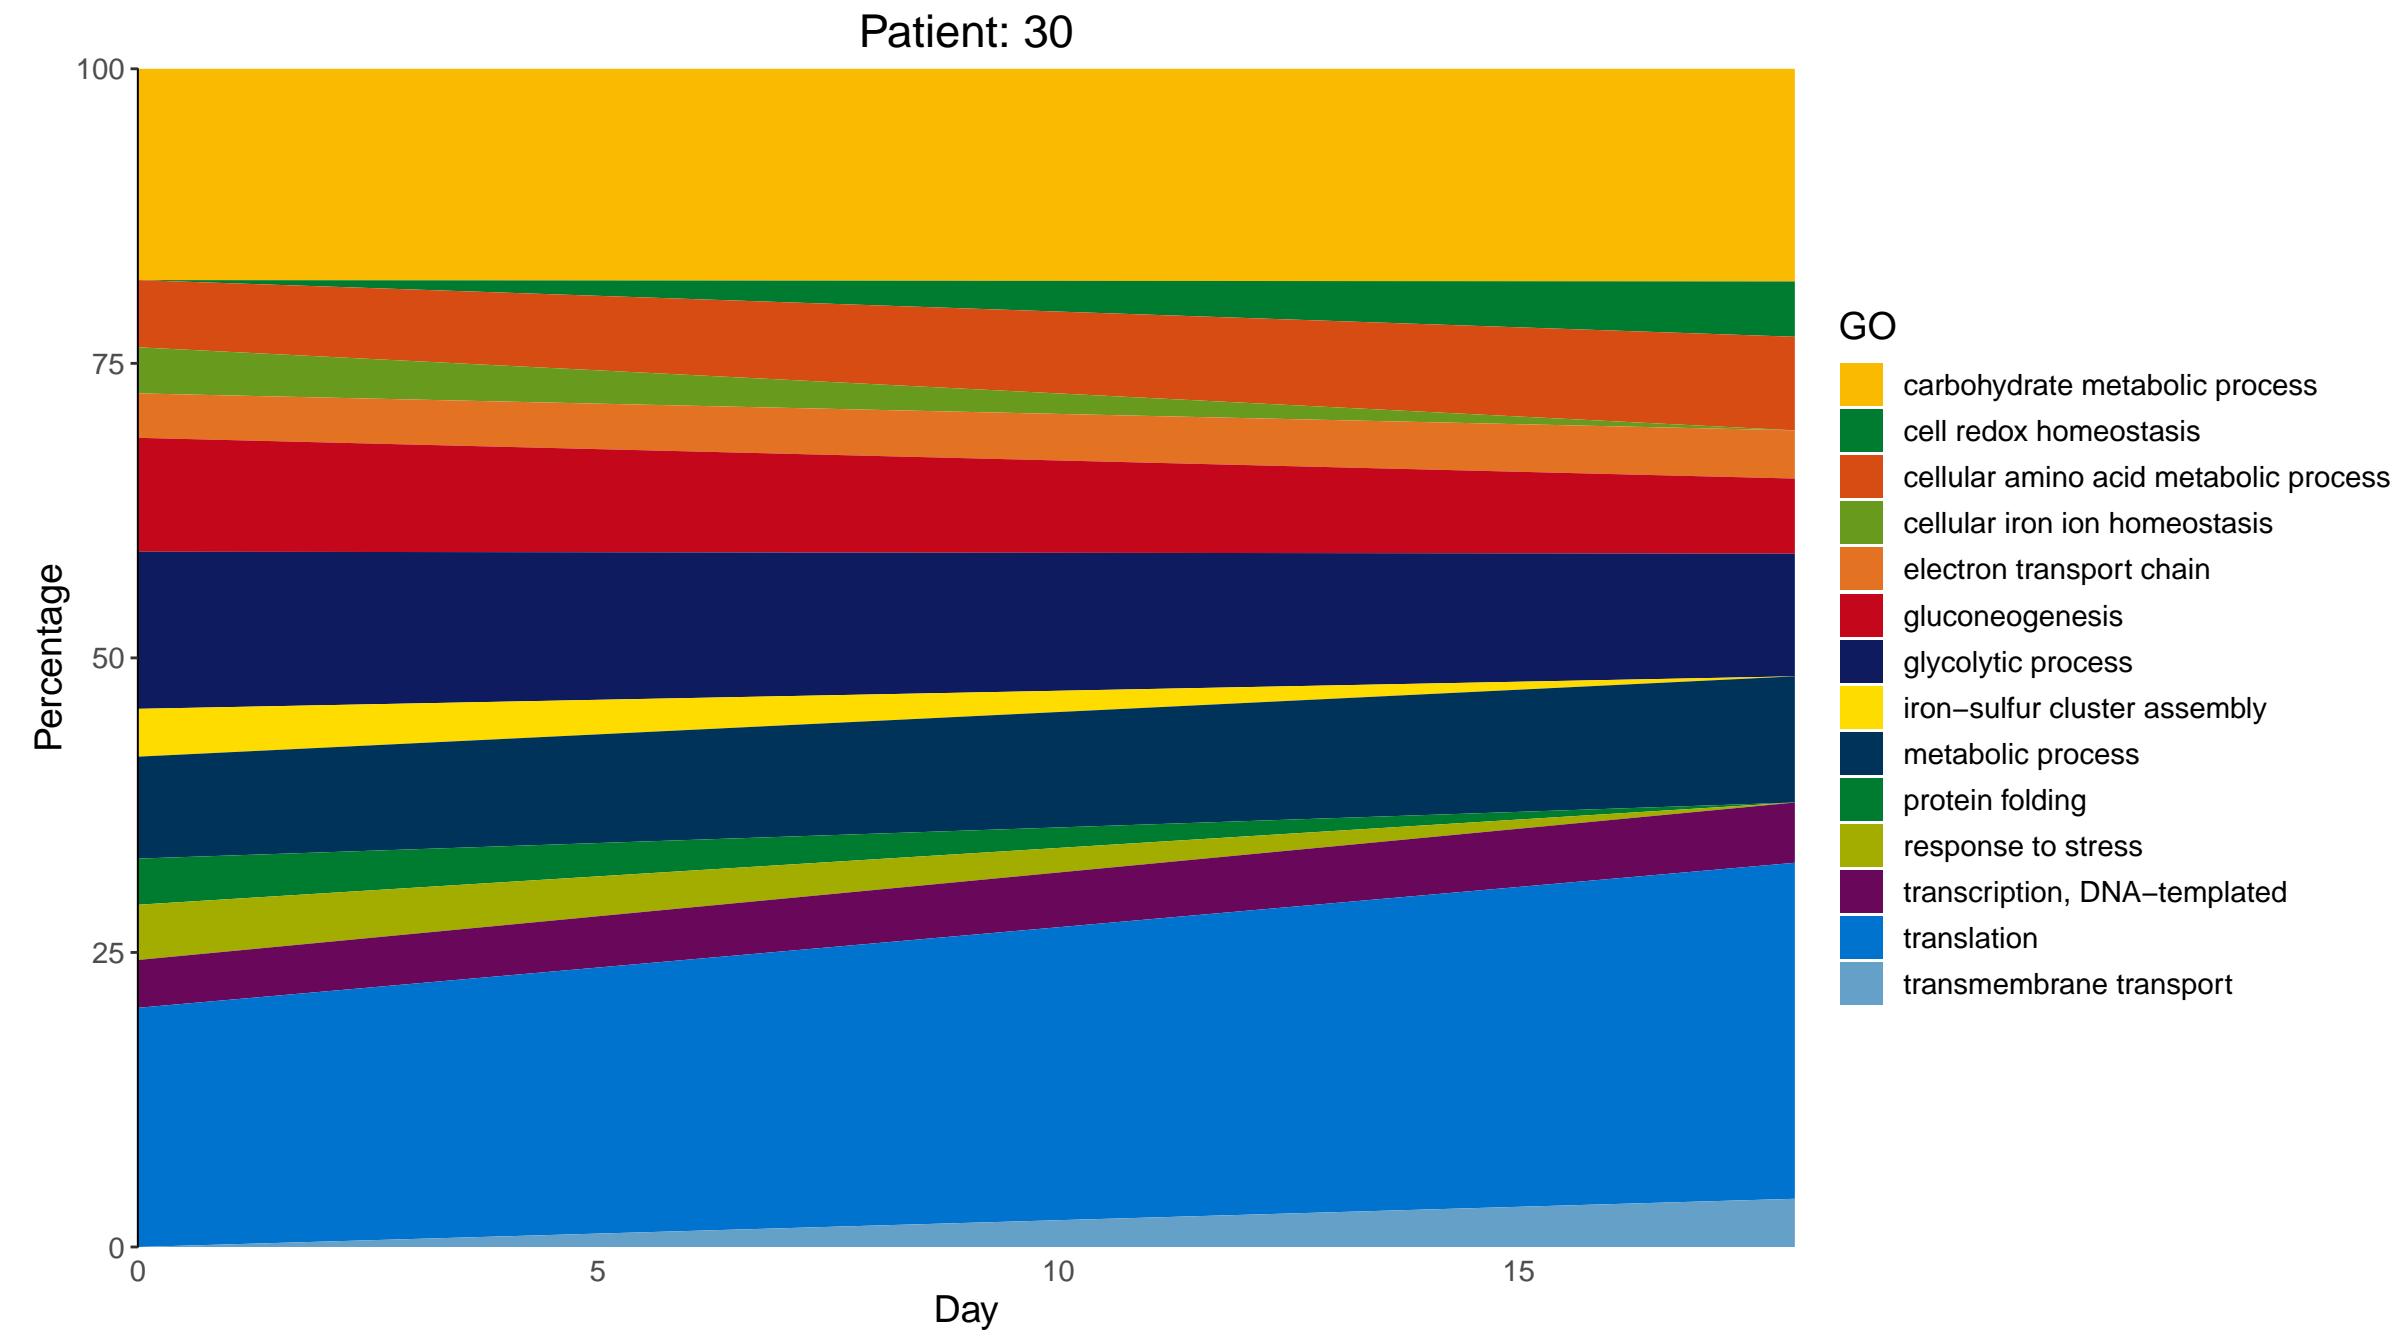

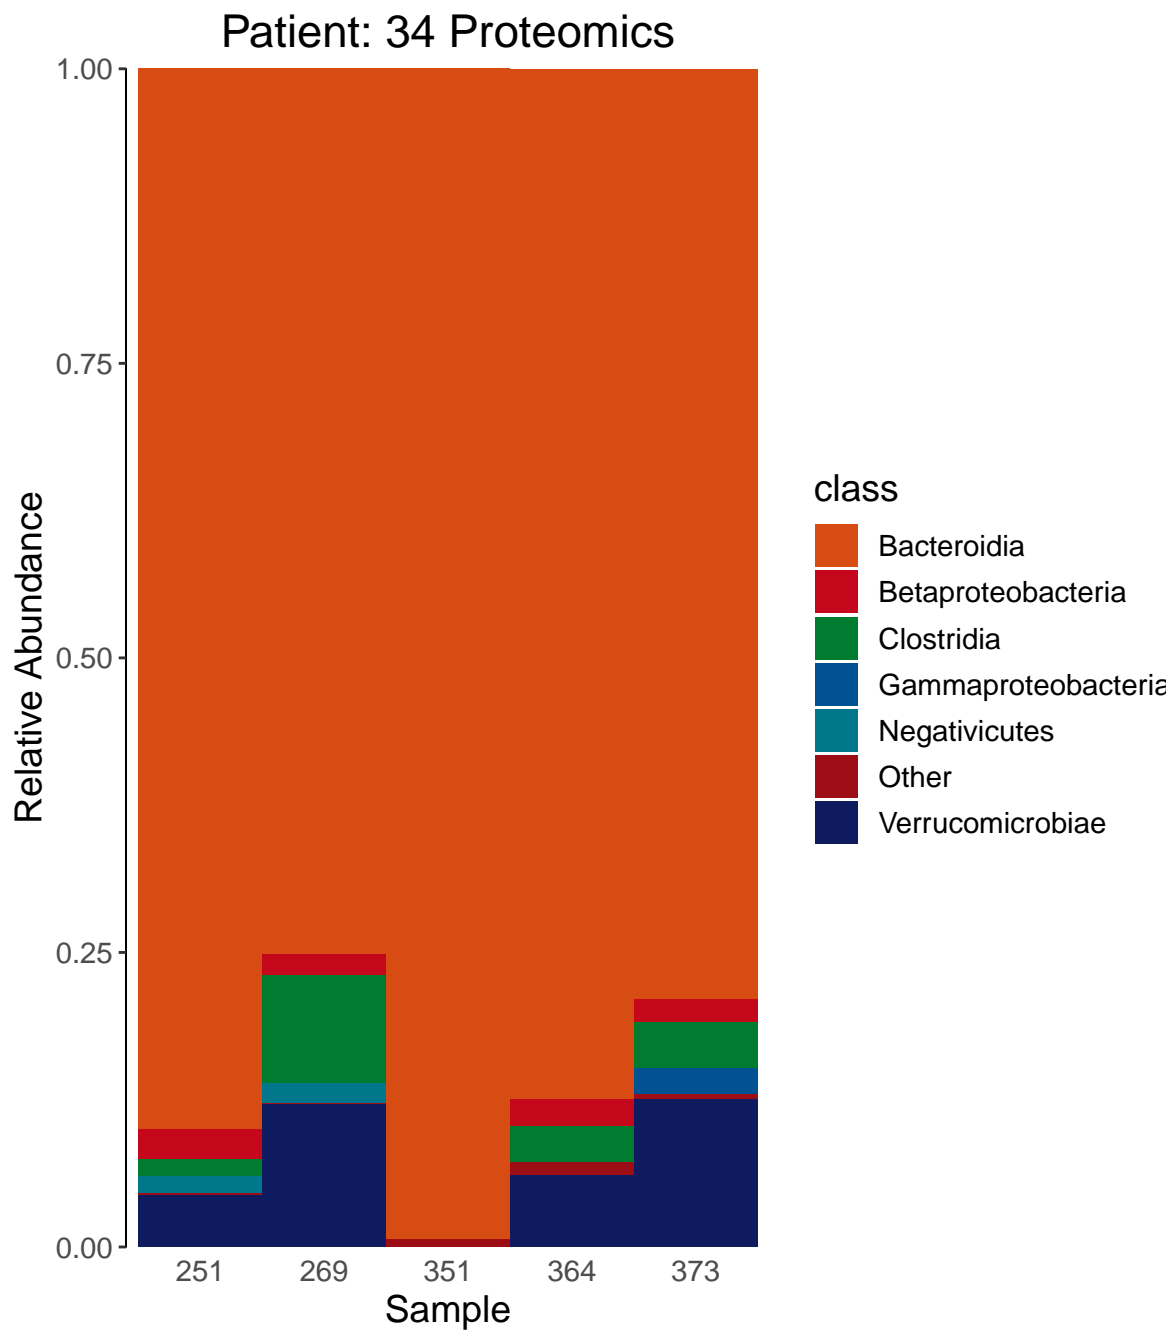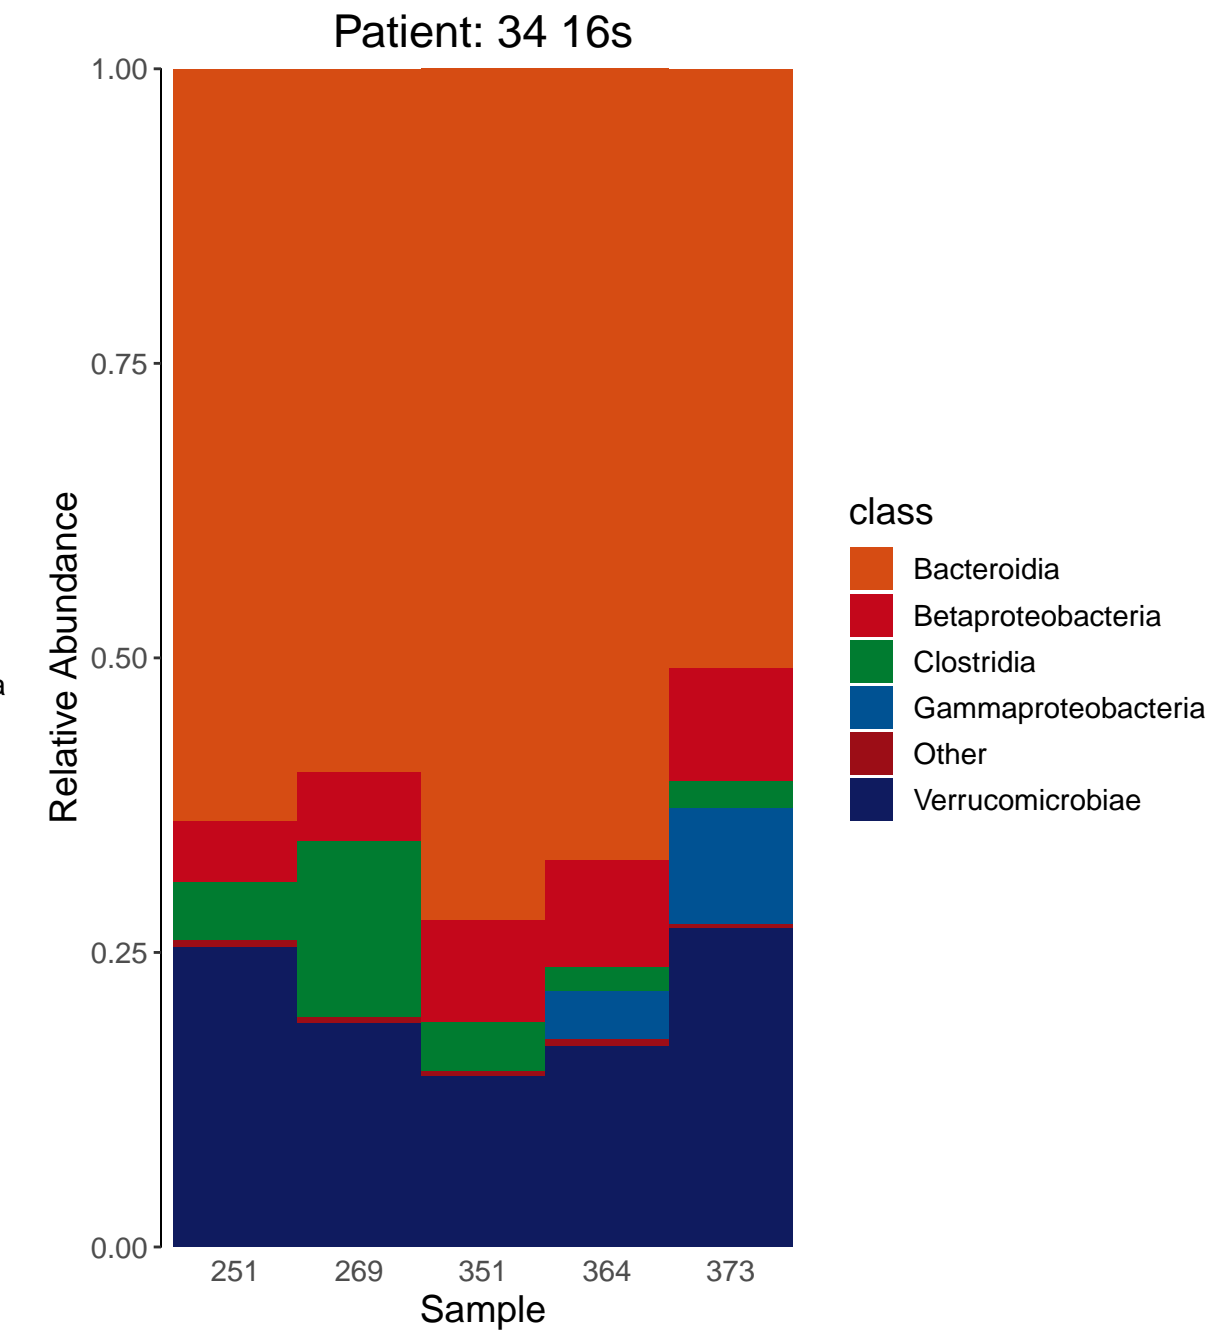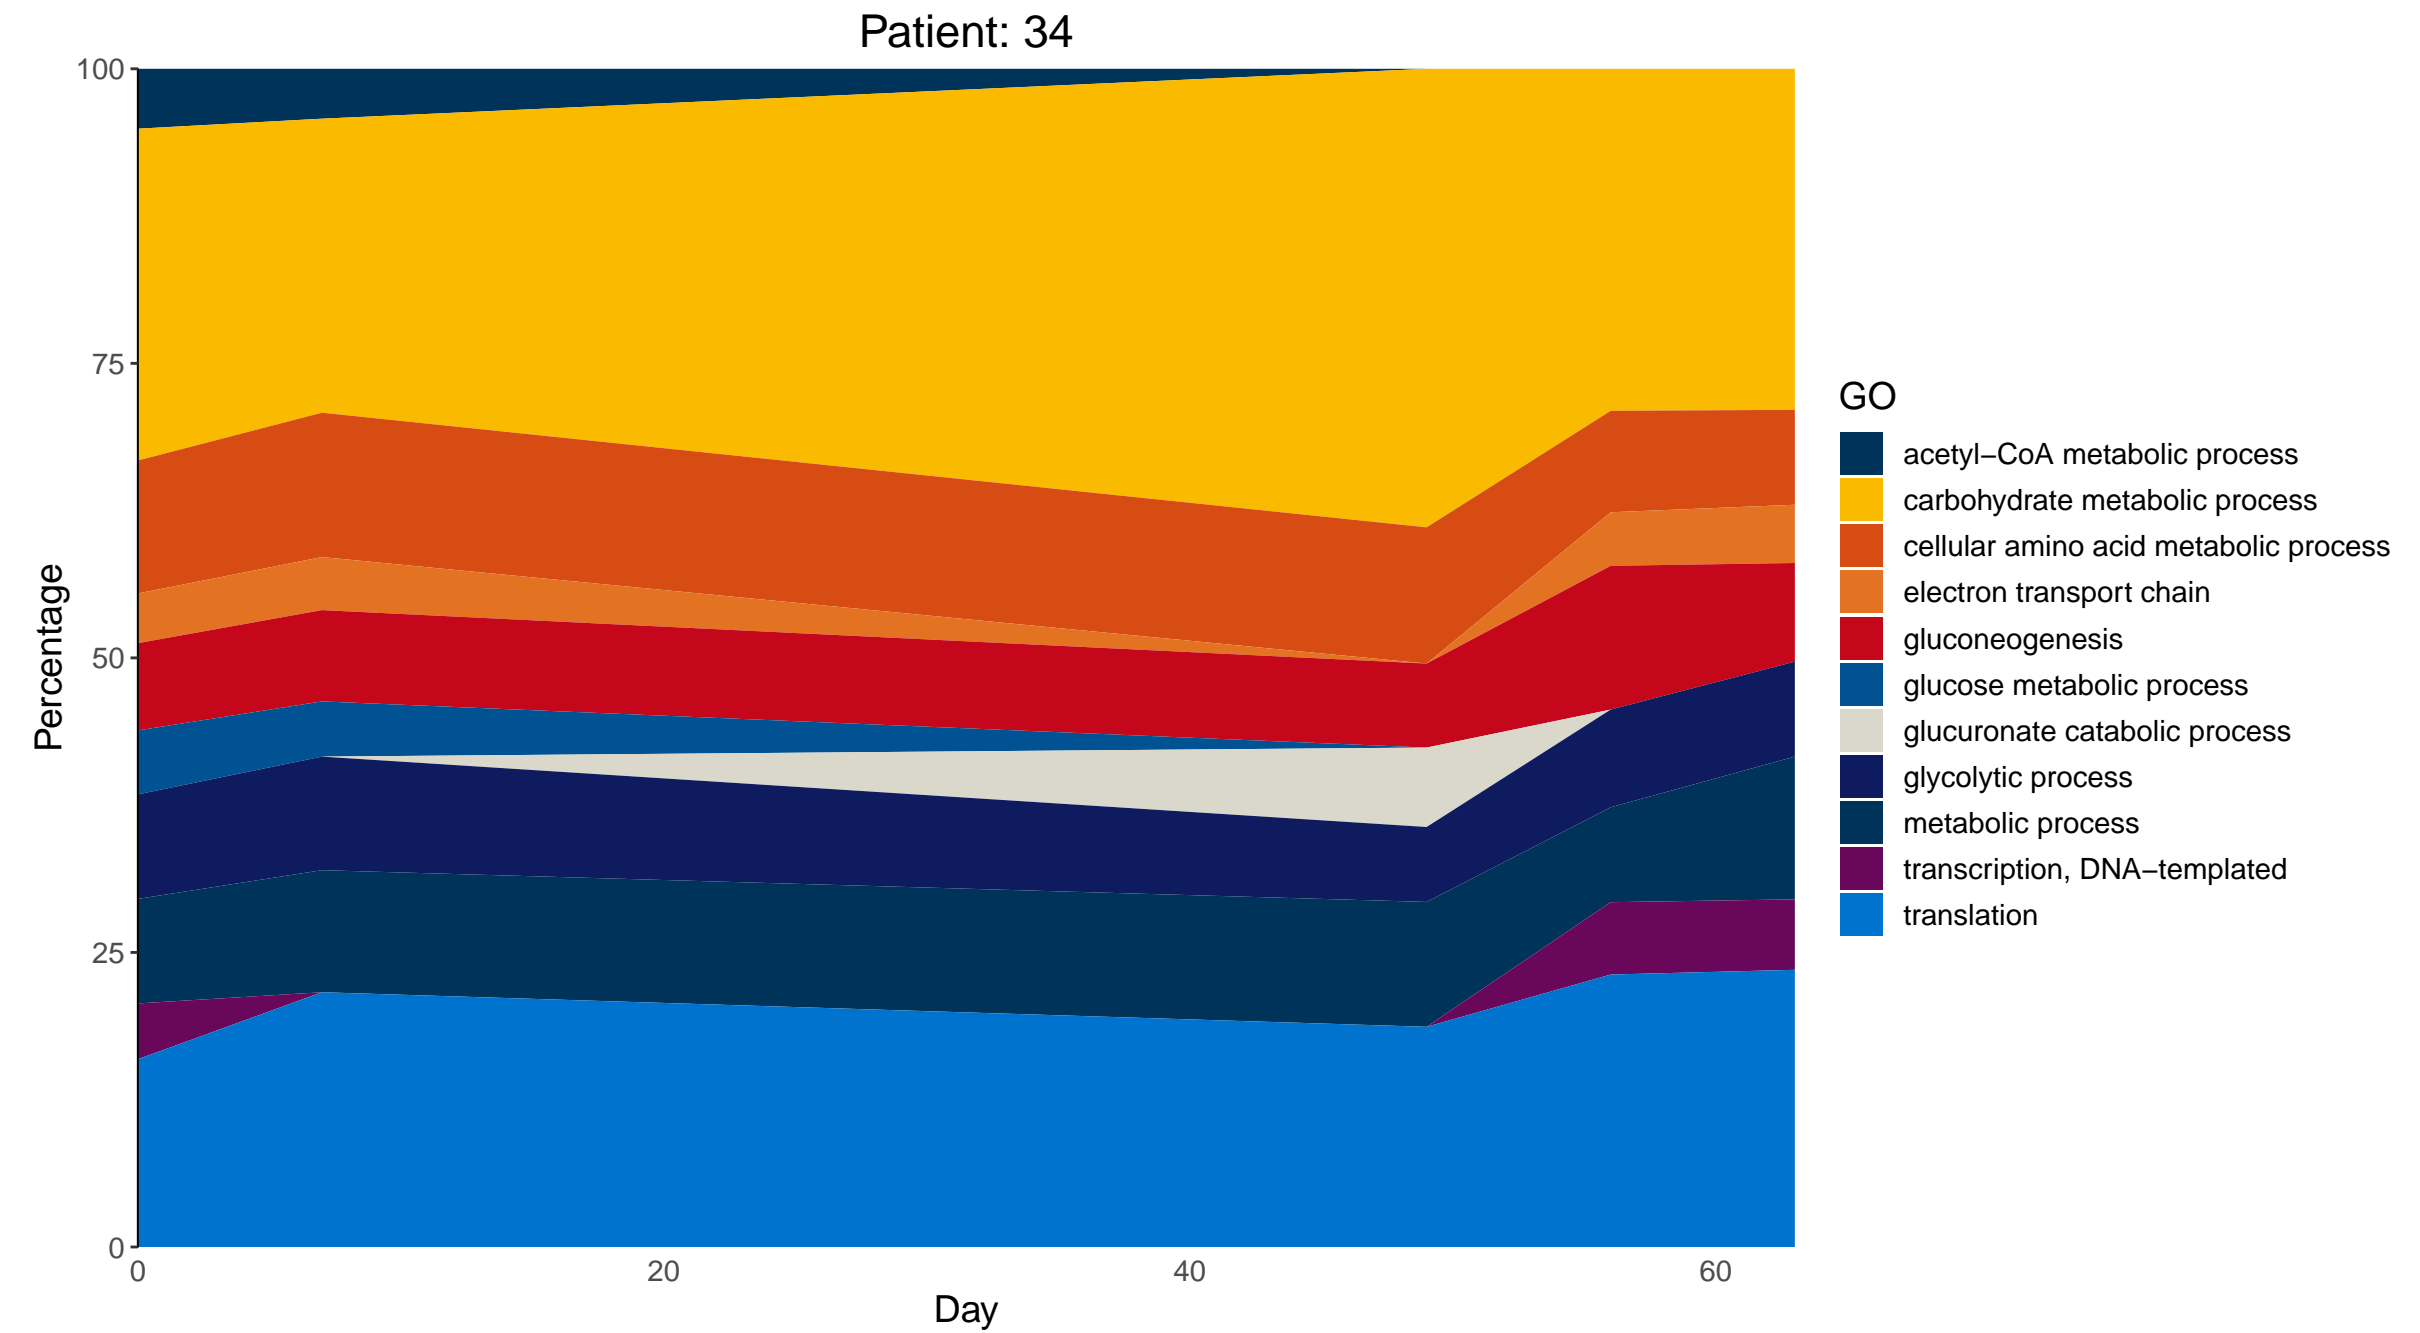



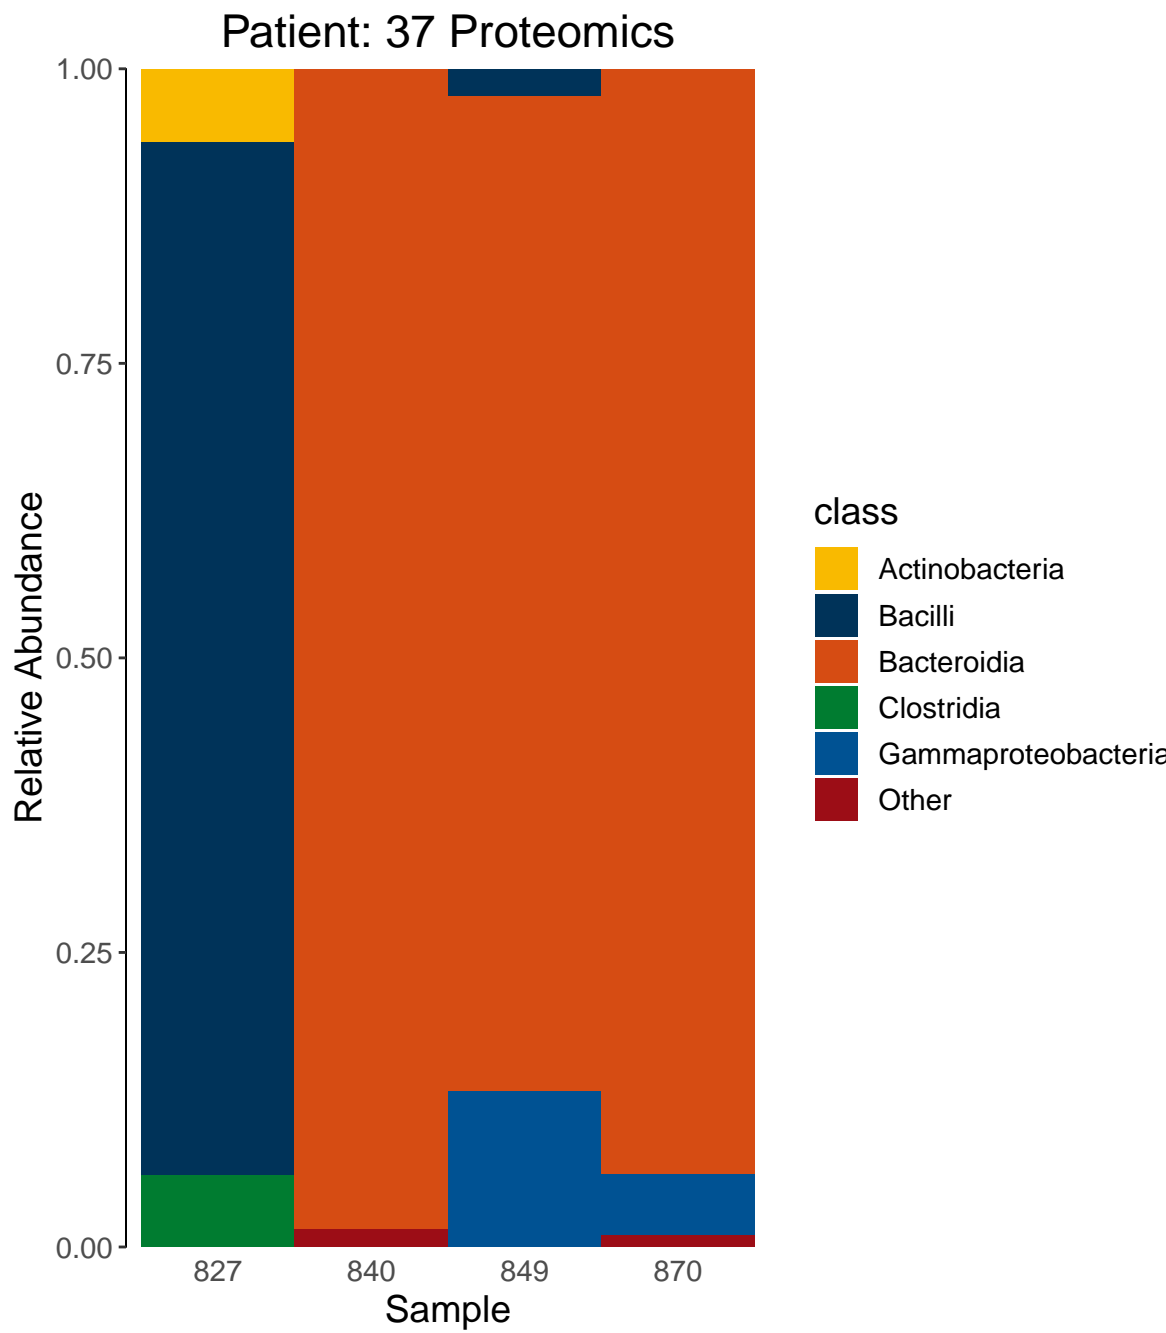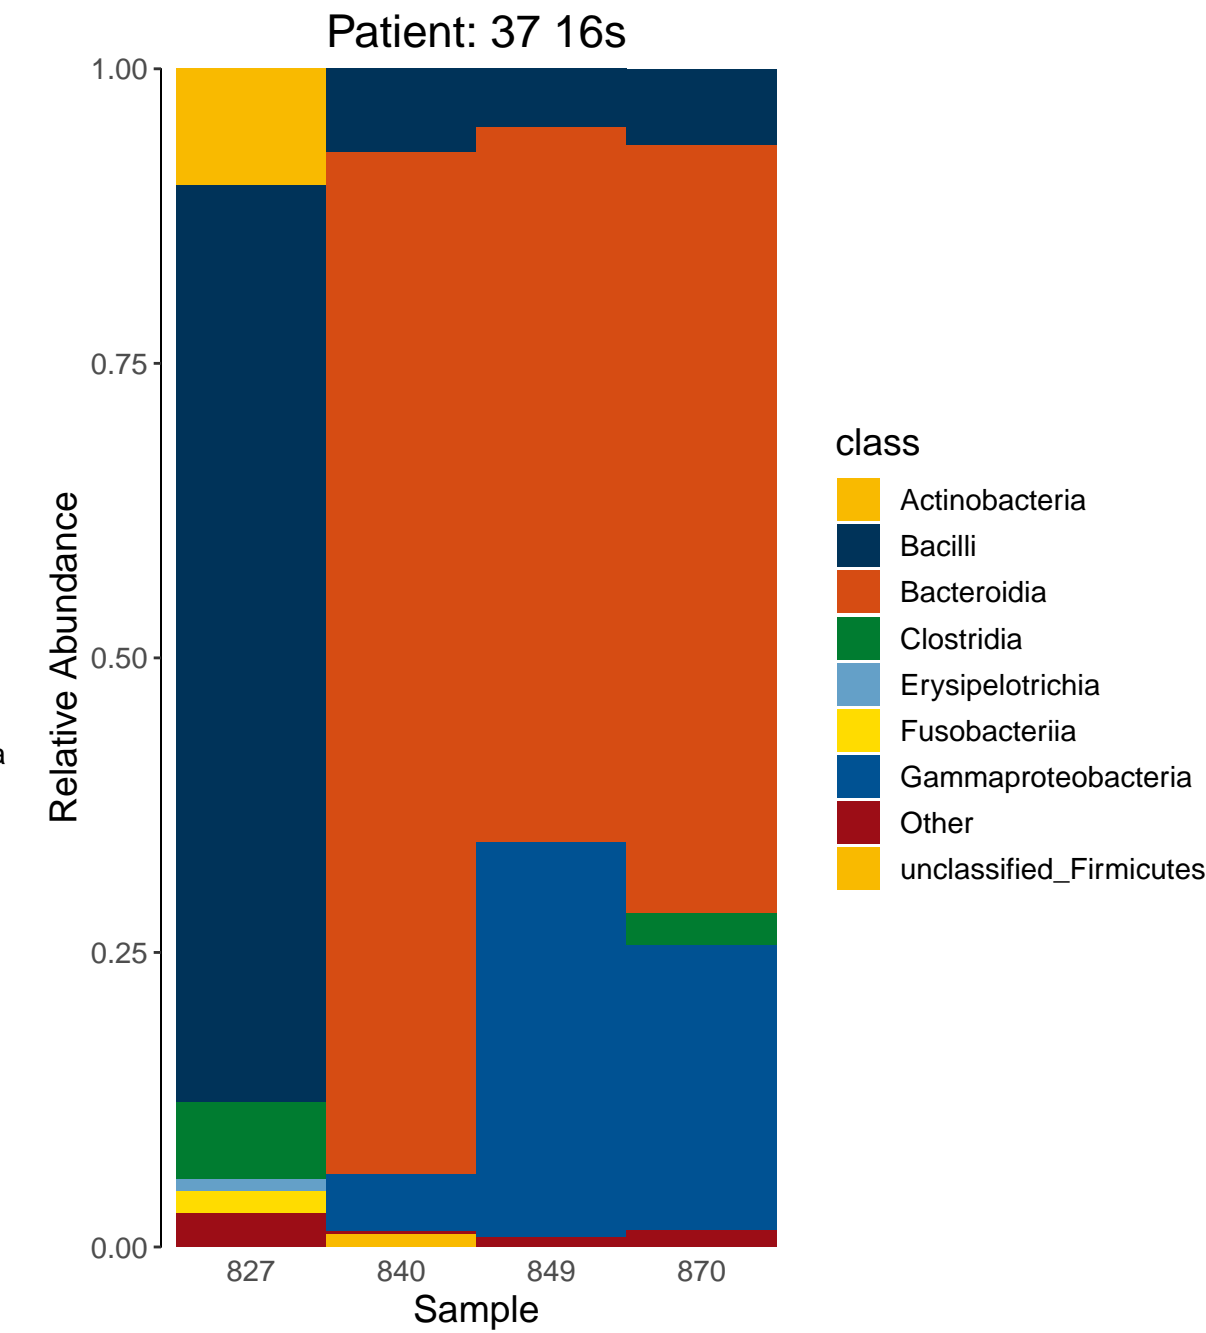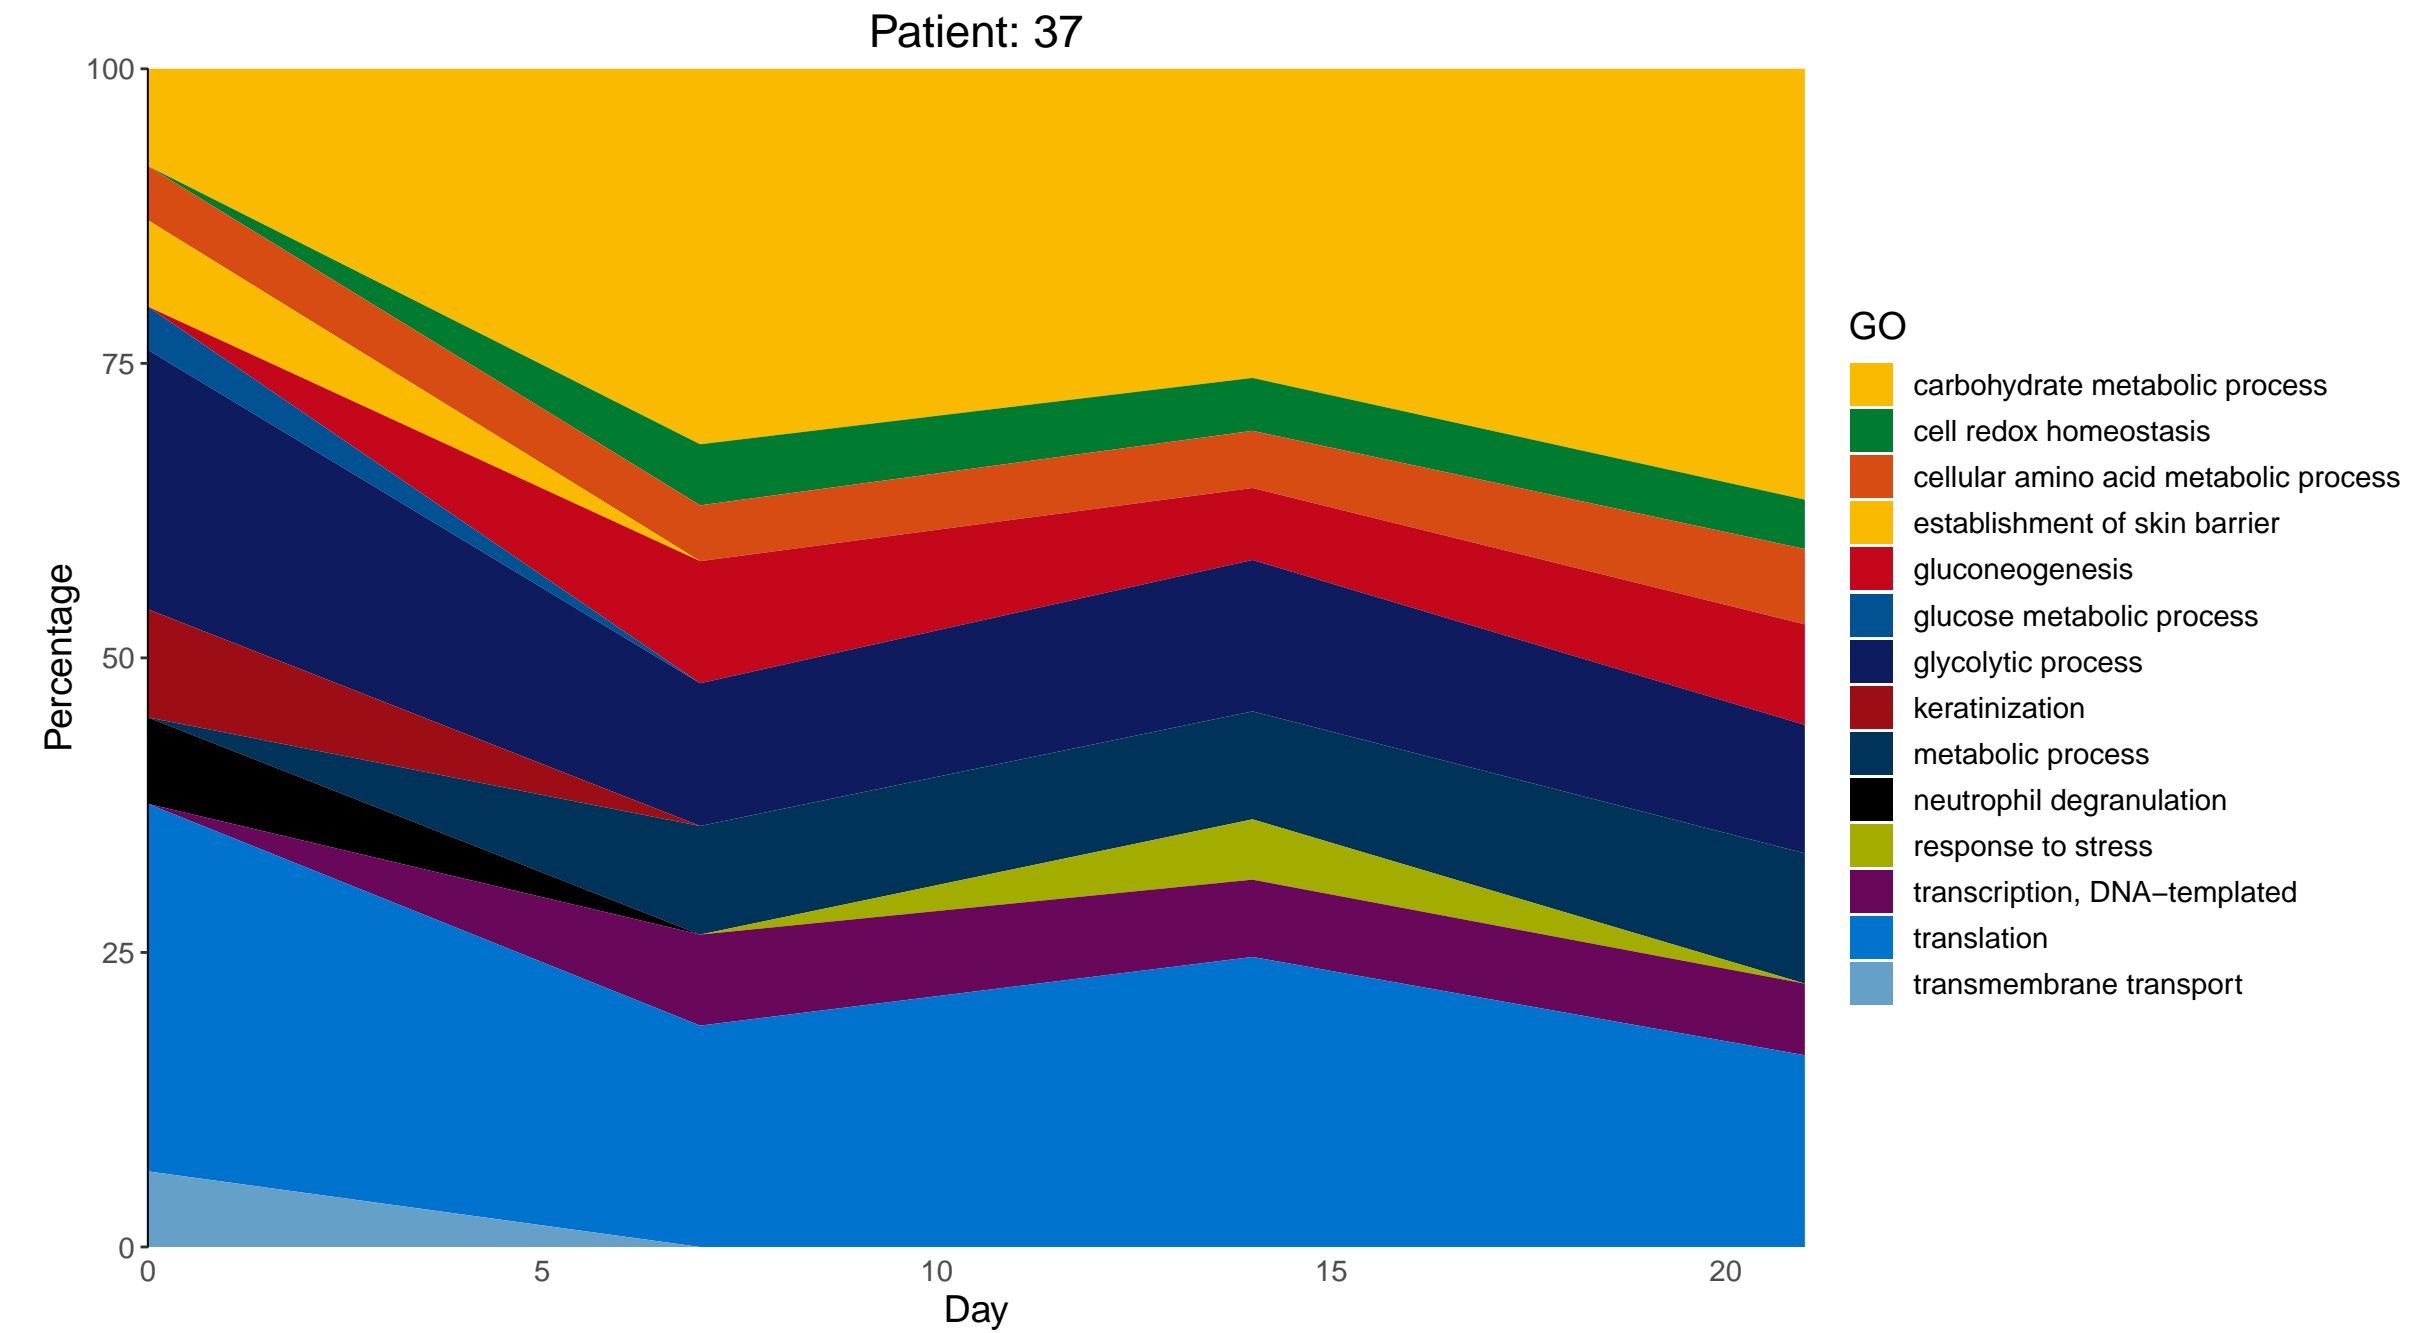

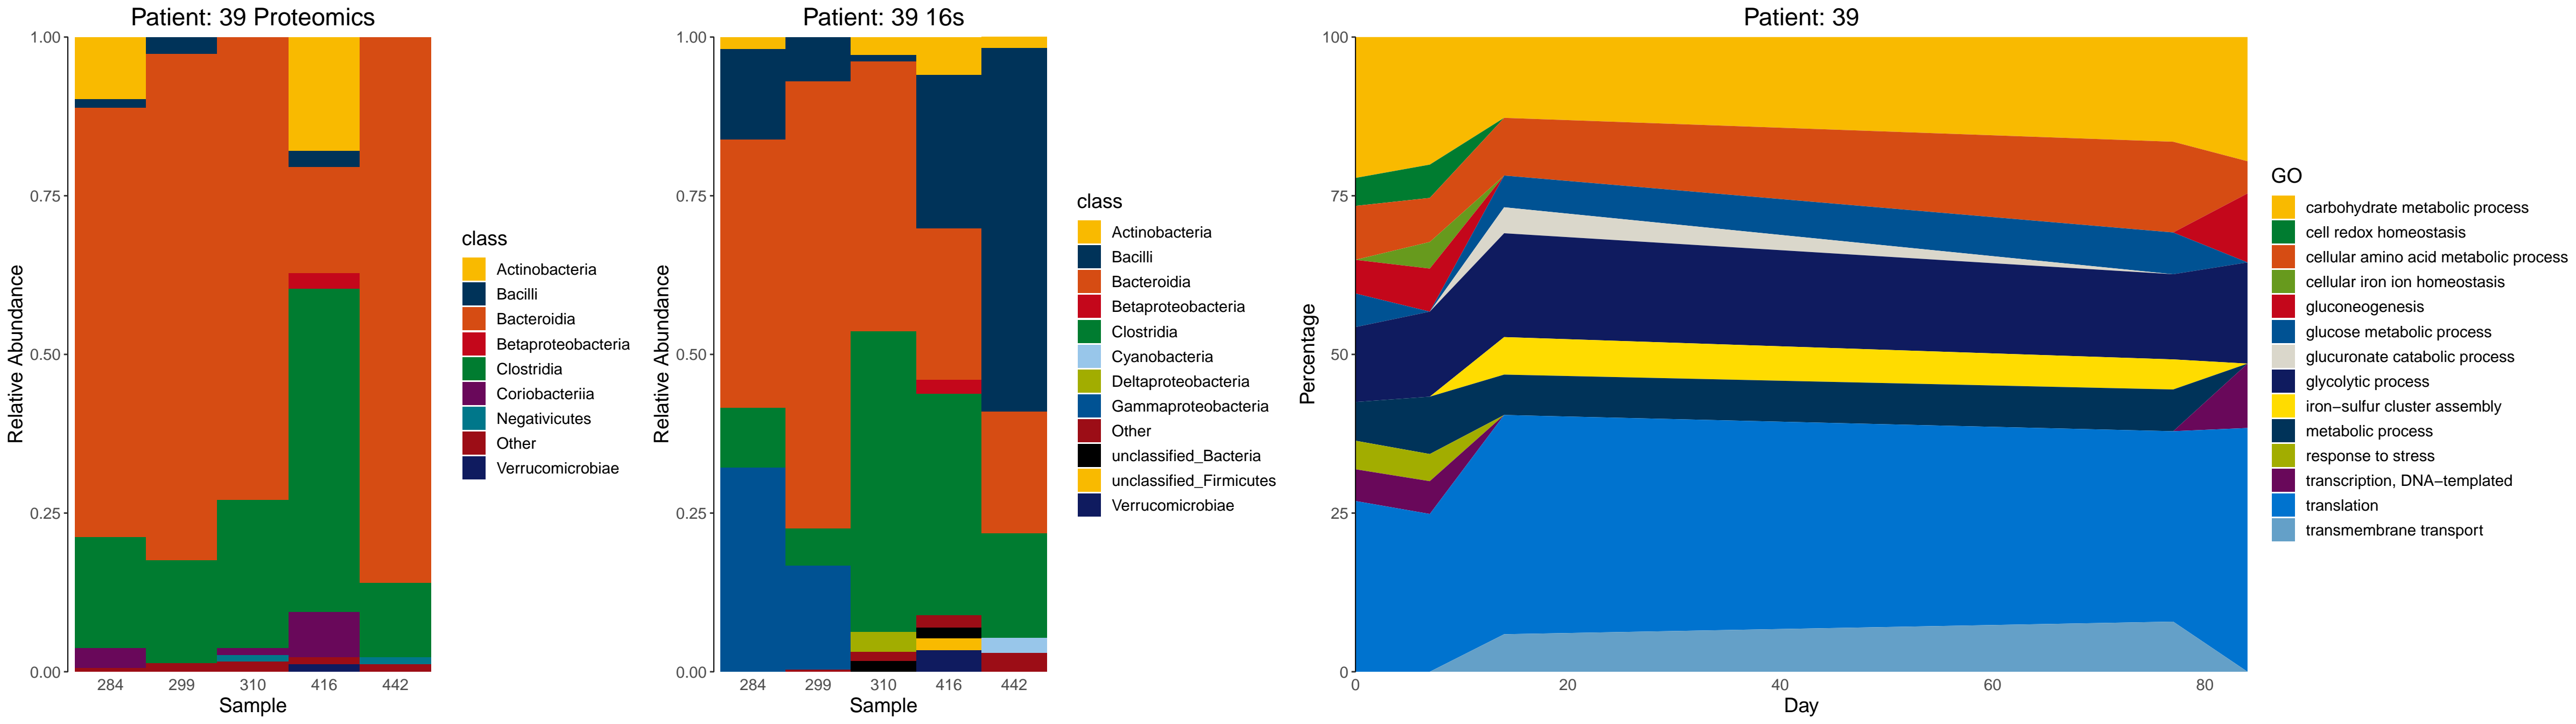

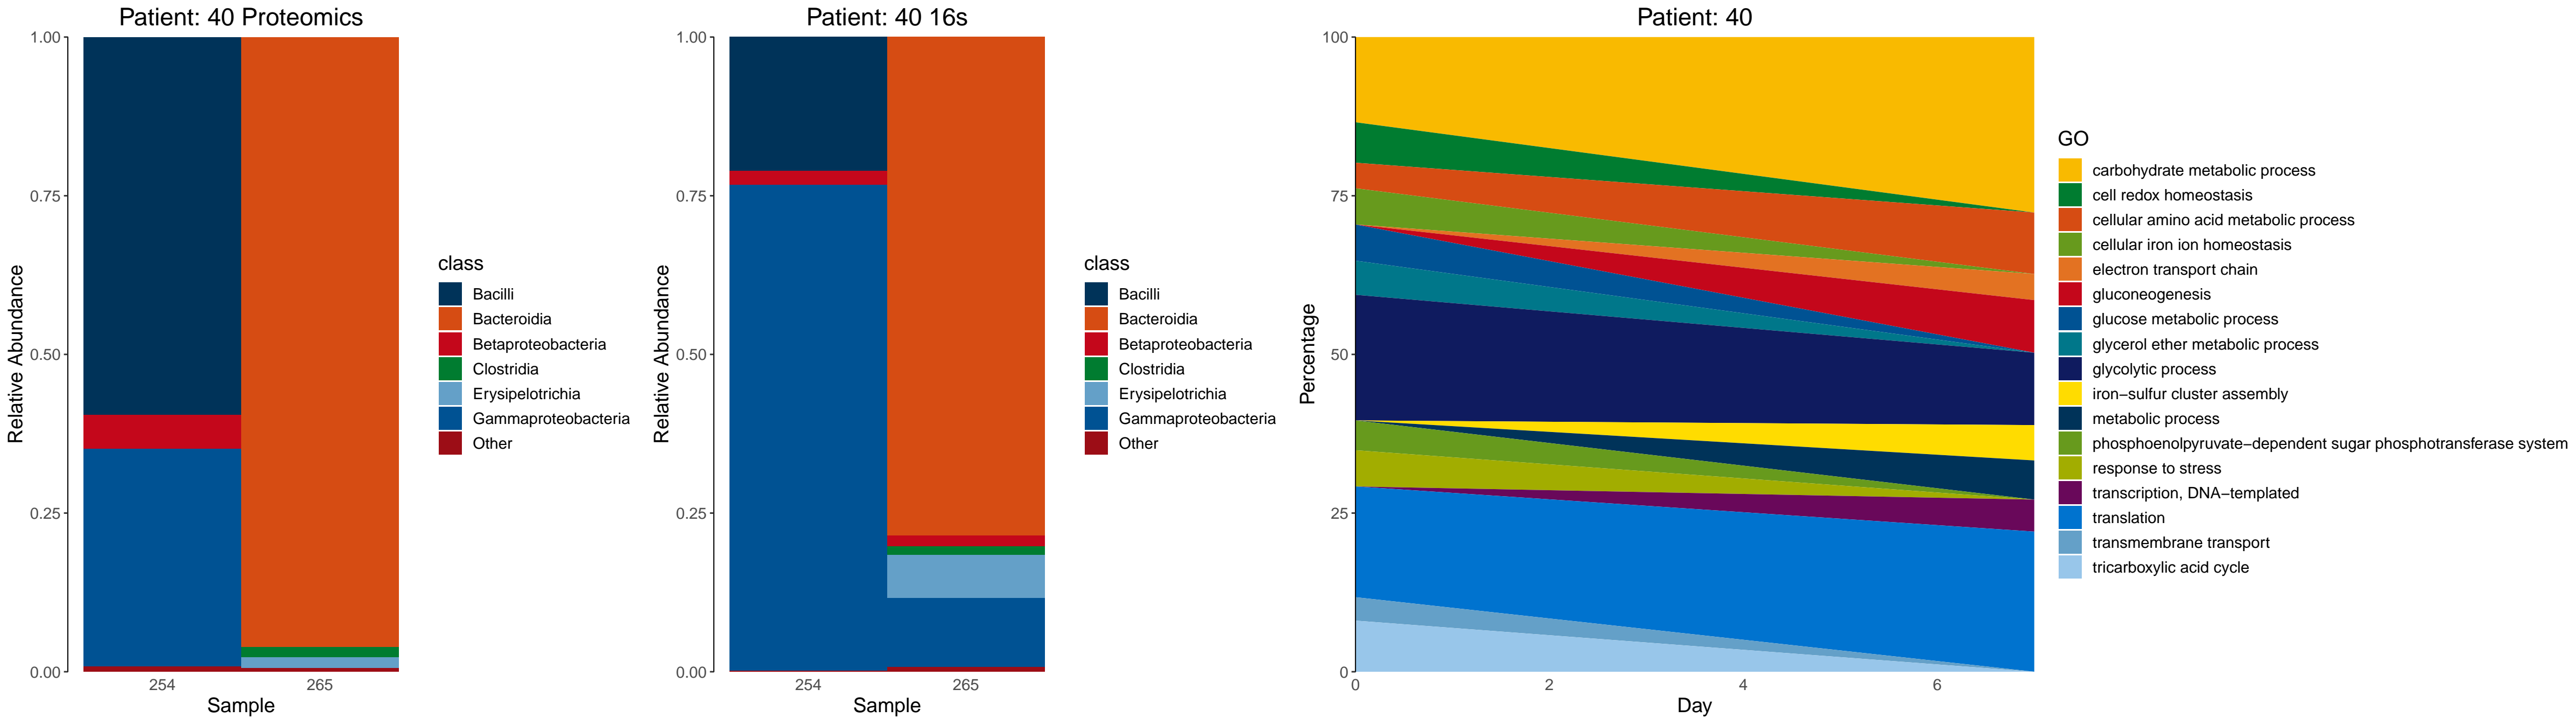

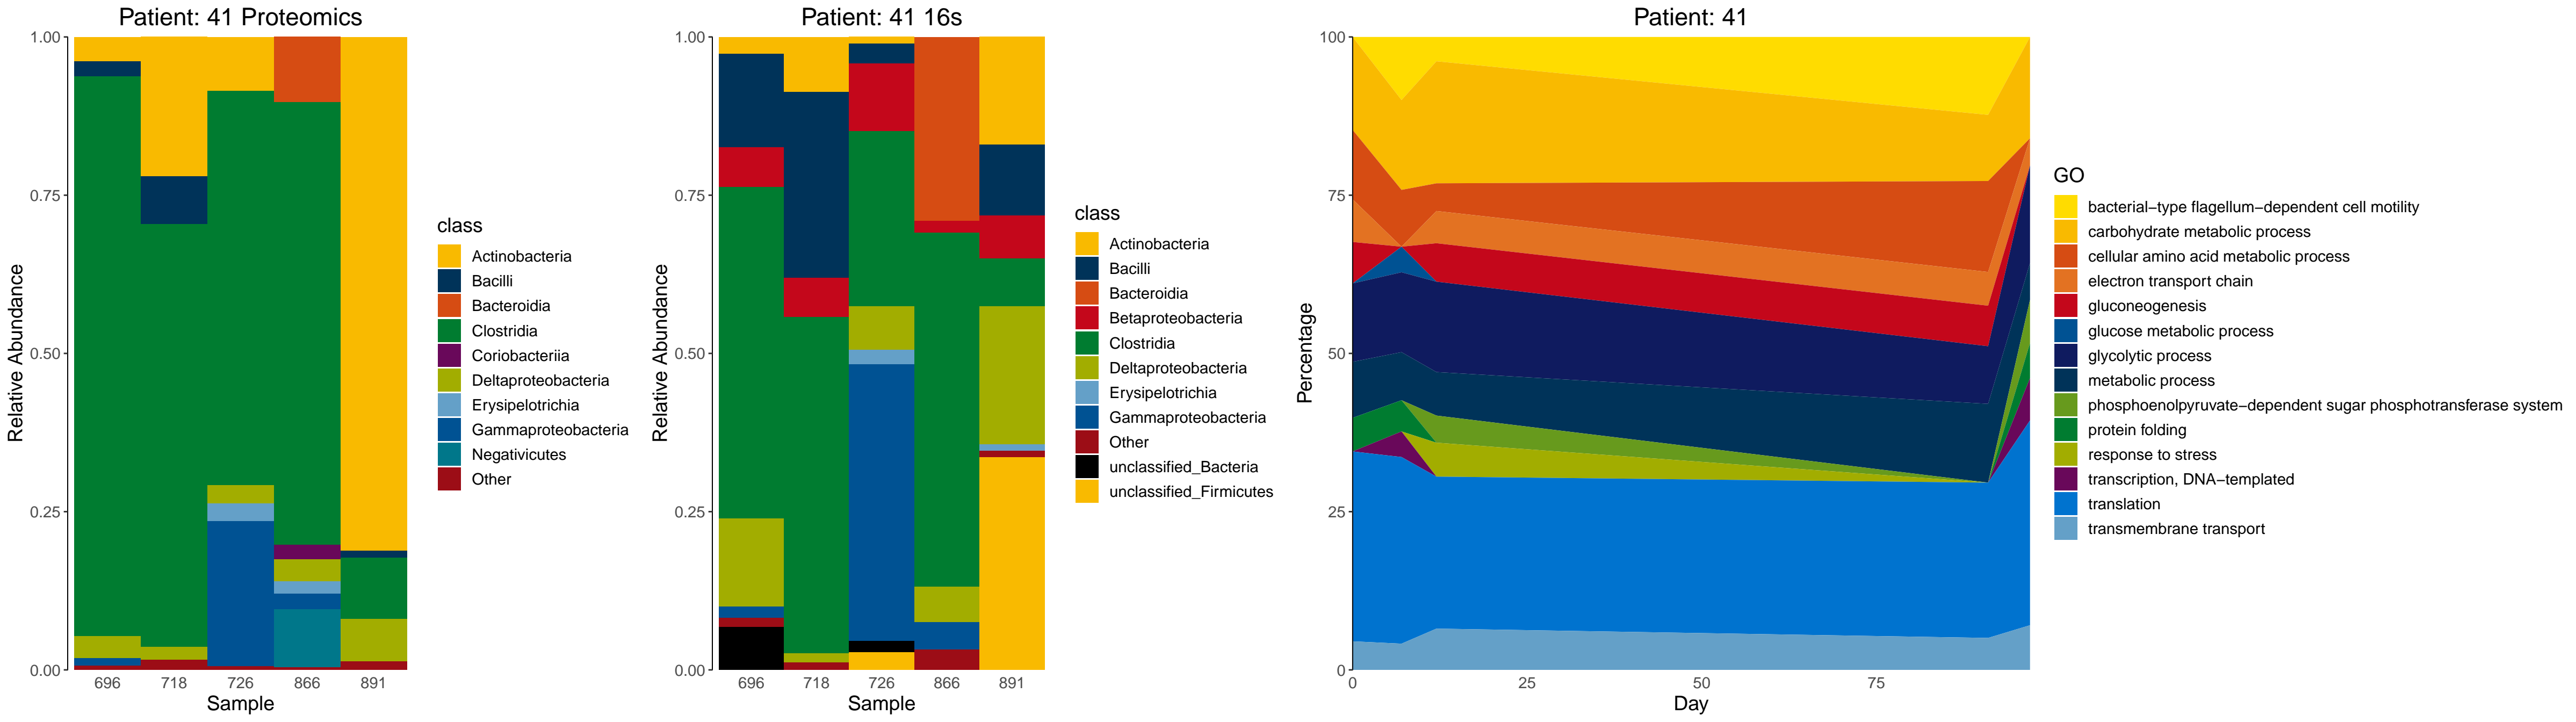

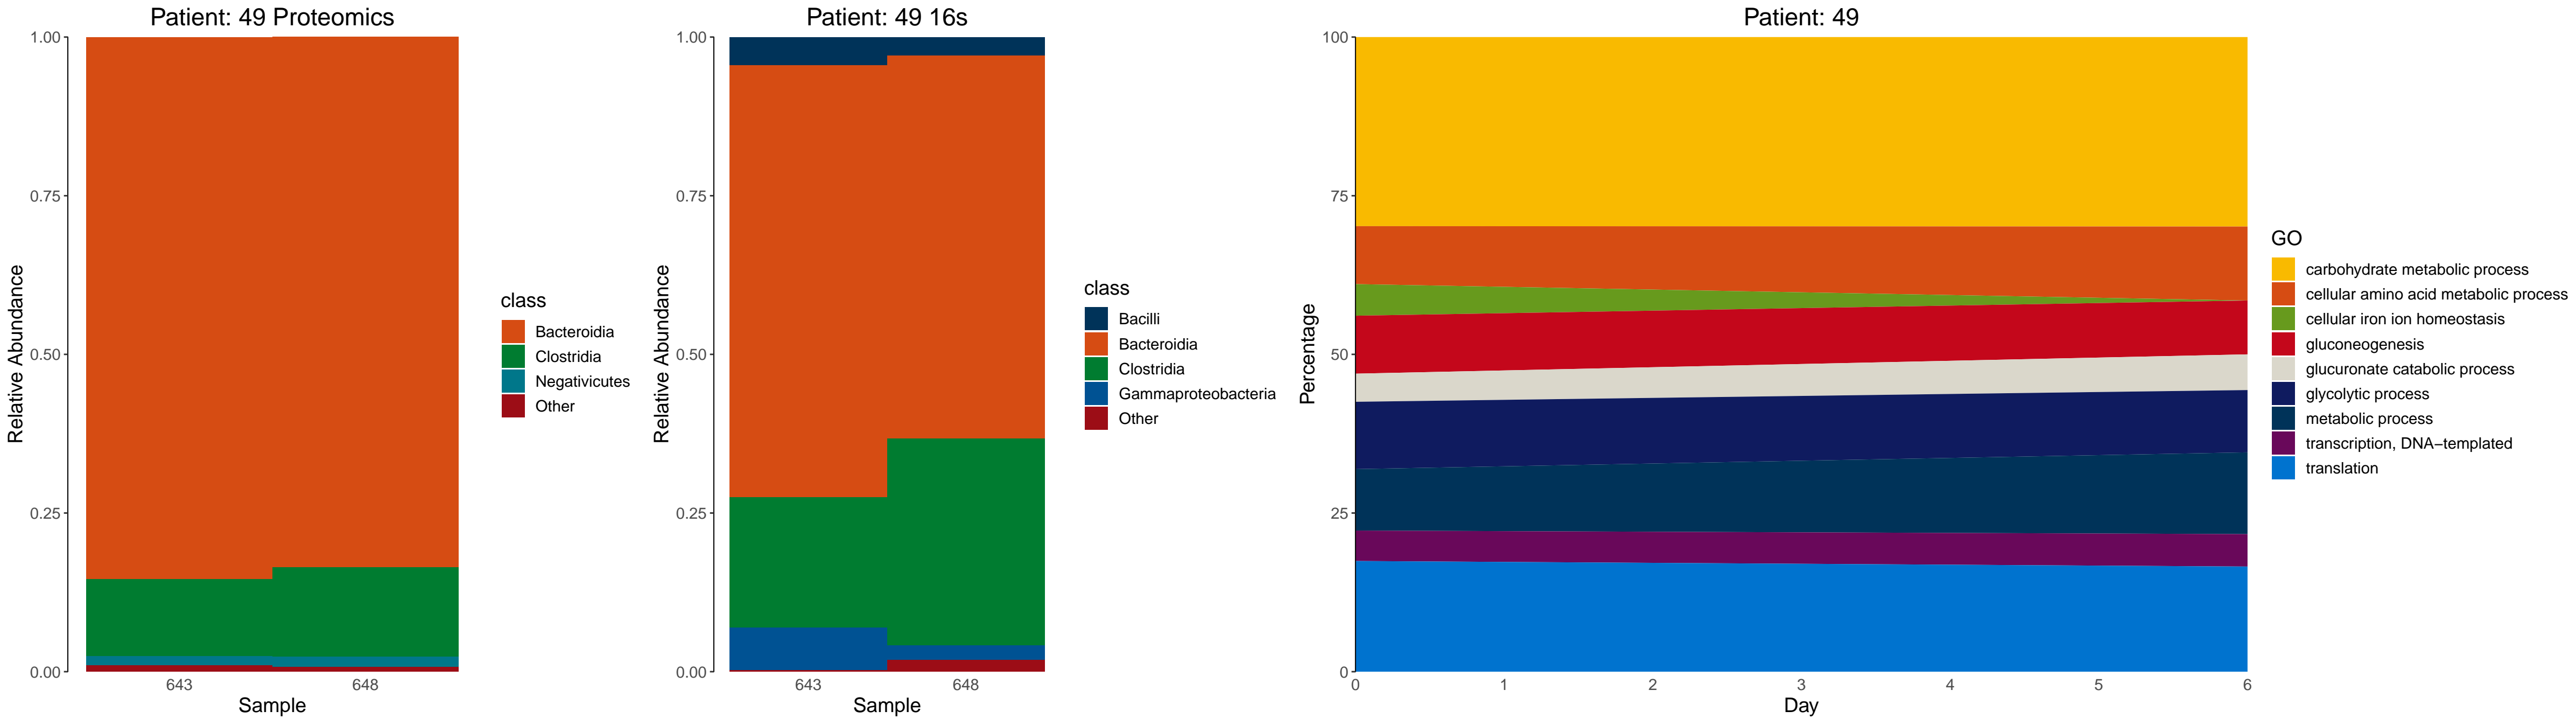

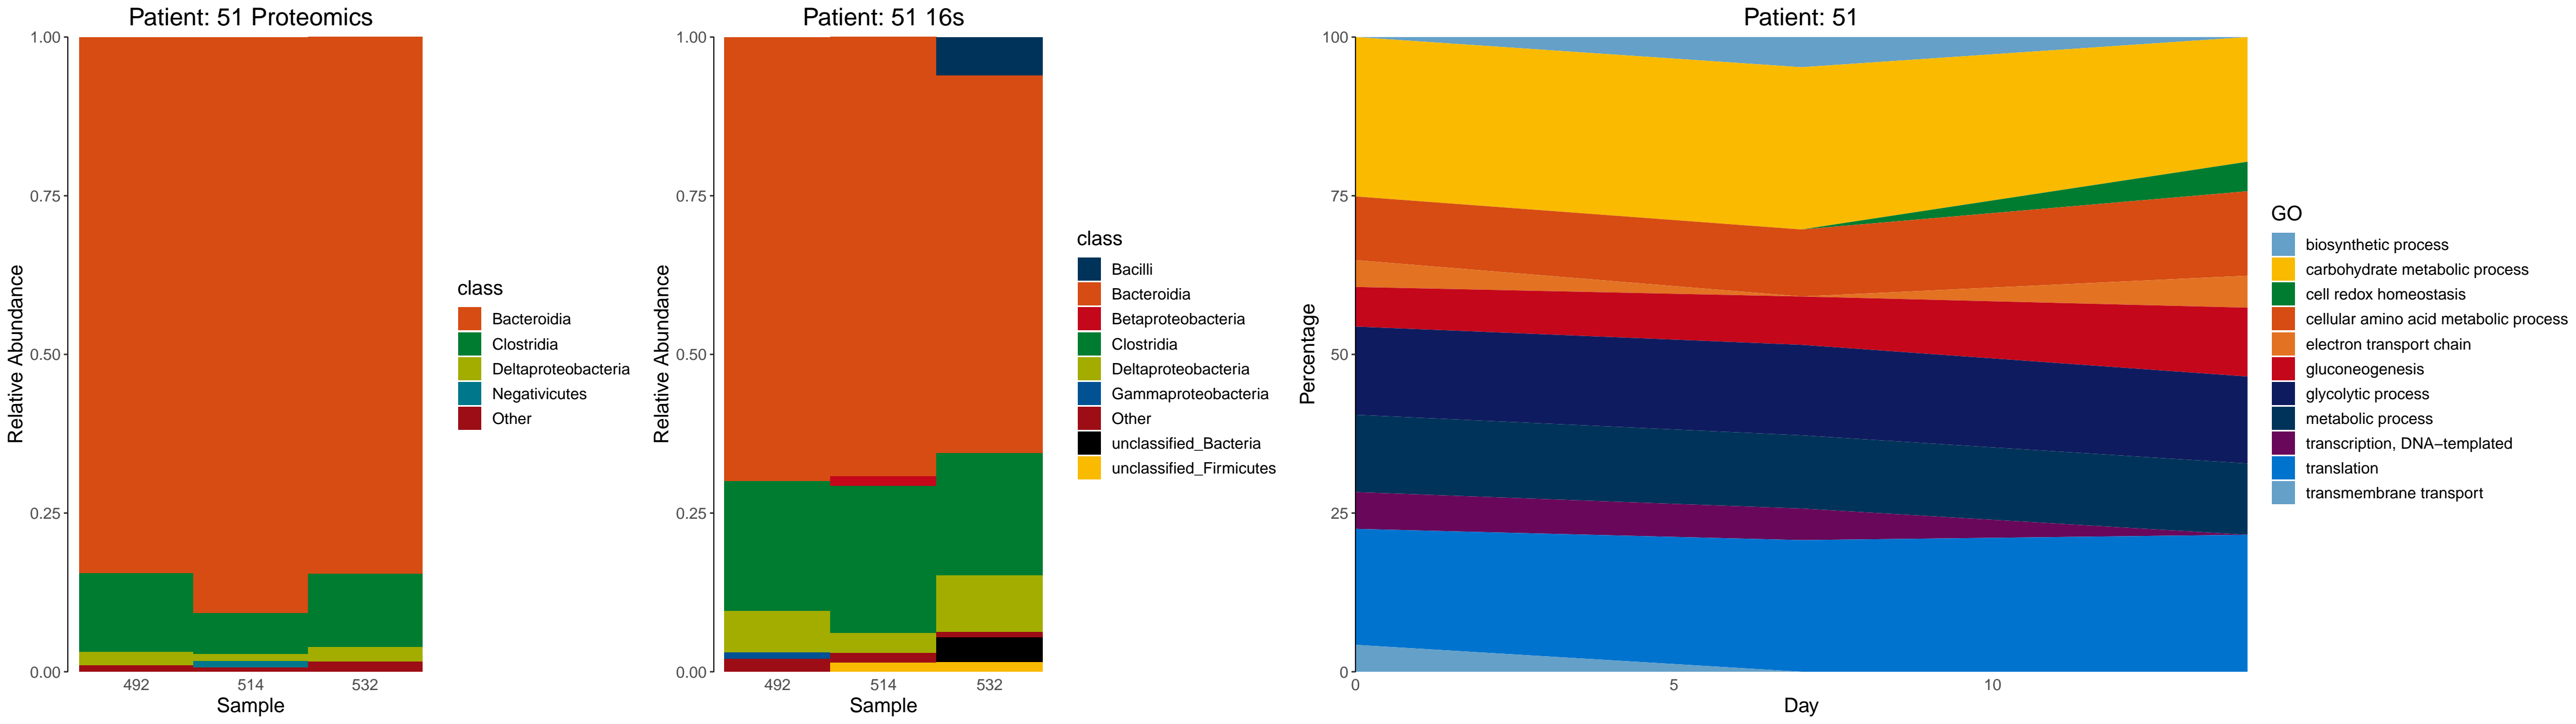

Patient: 54 Proteomics

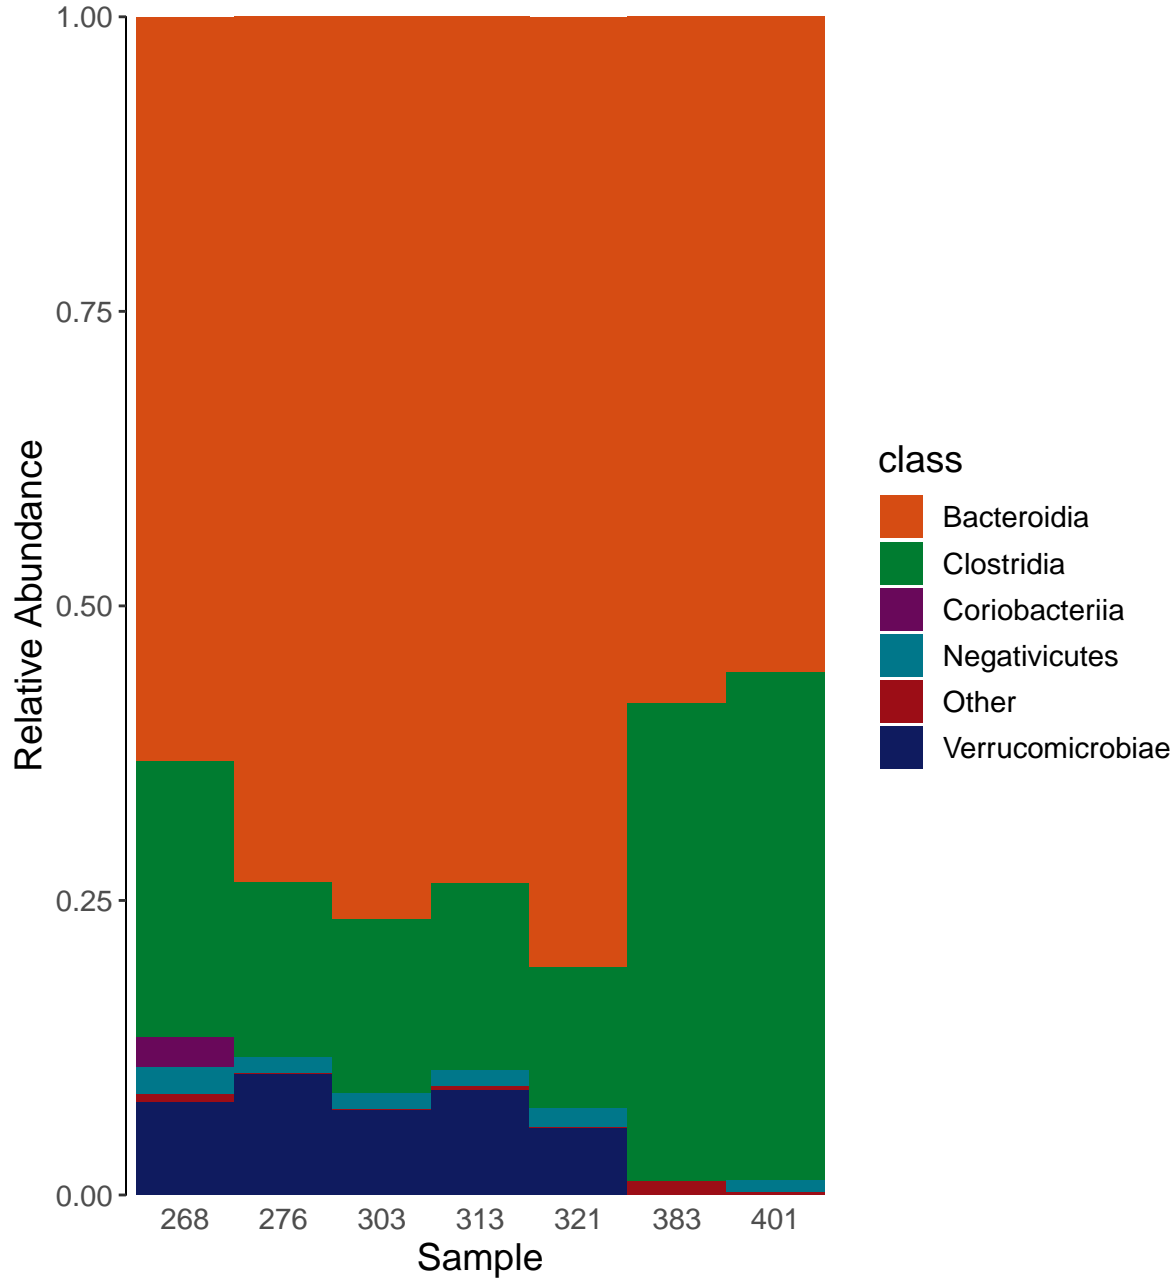

Patient: 54 16s

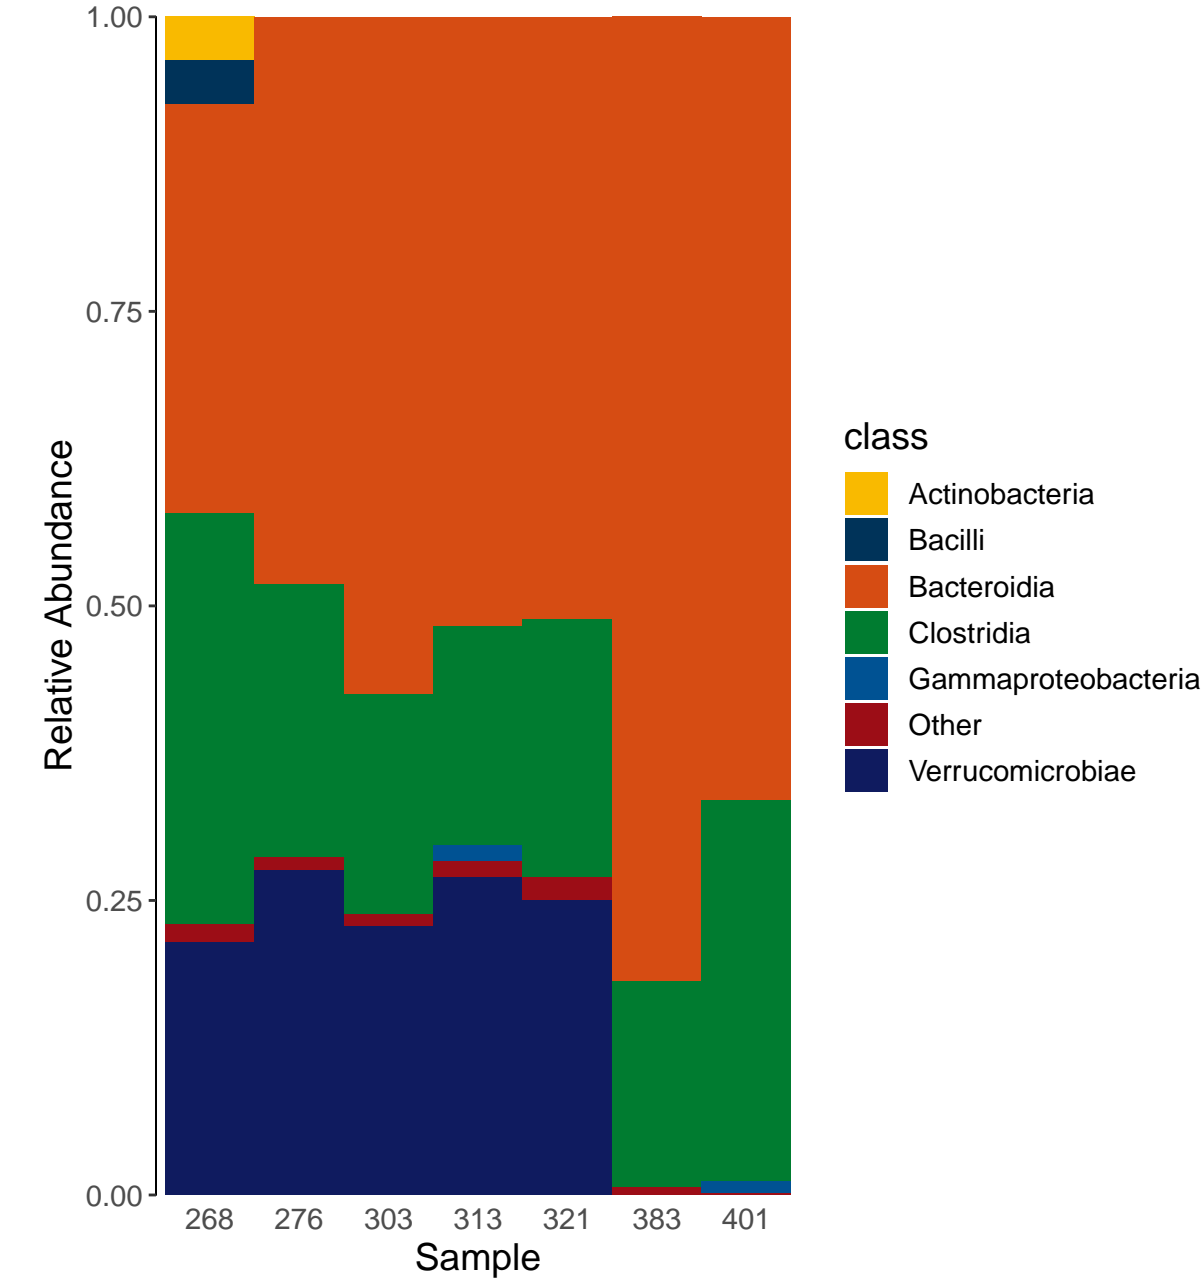

Patient: 54

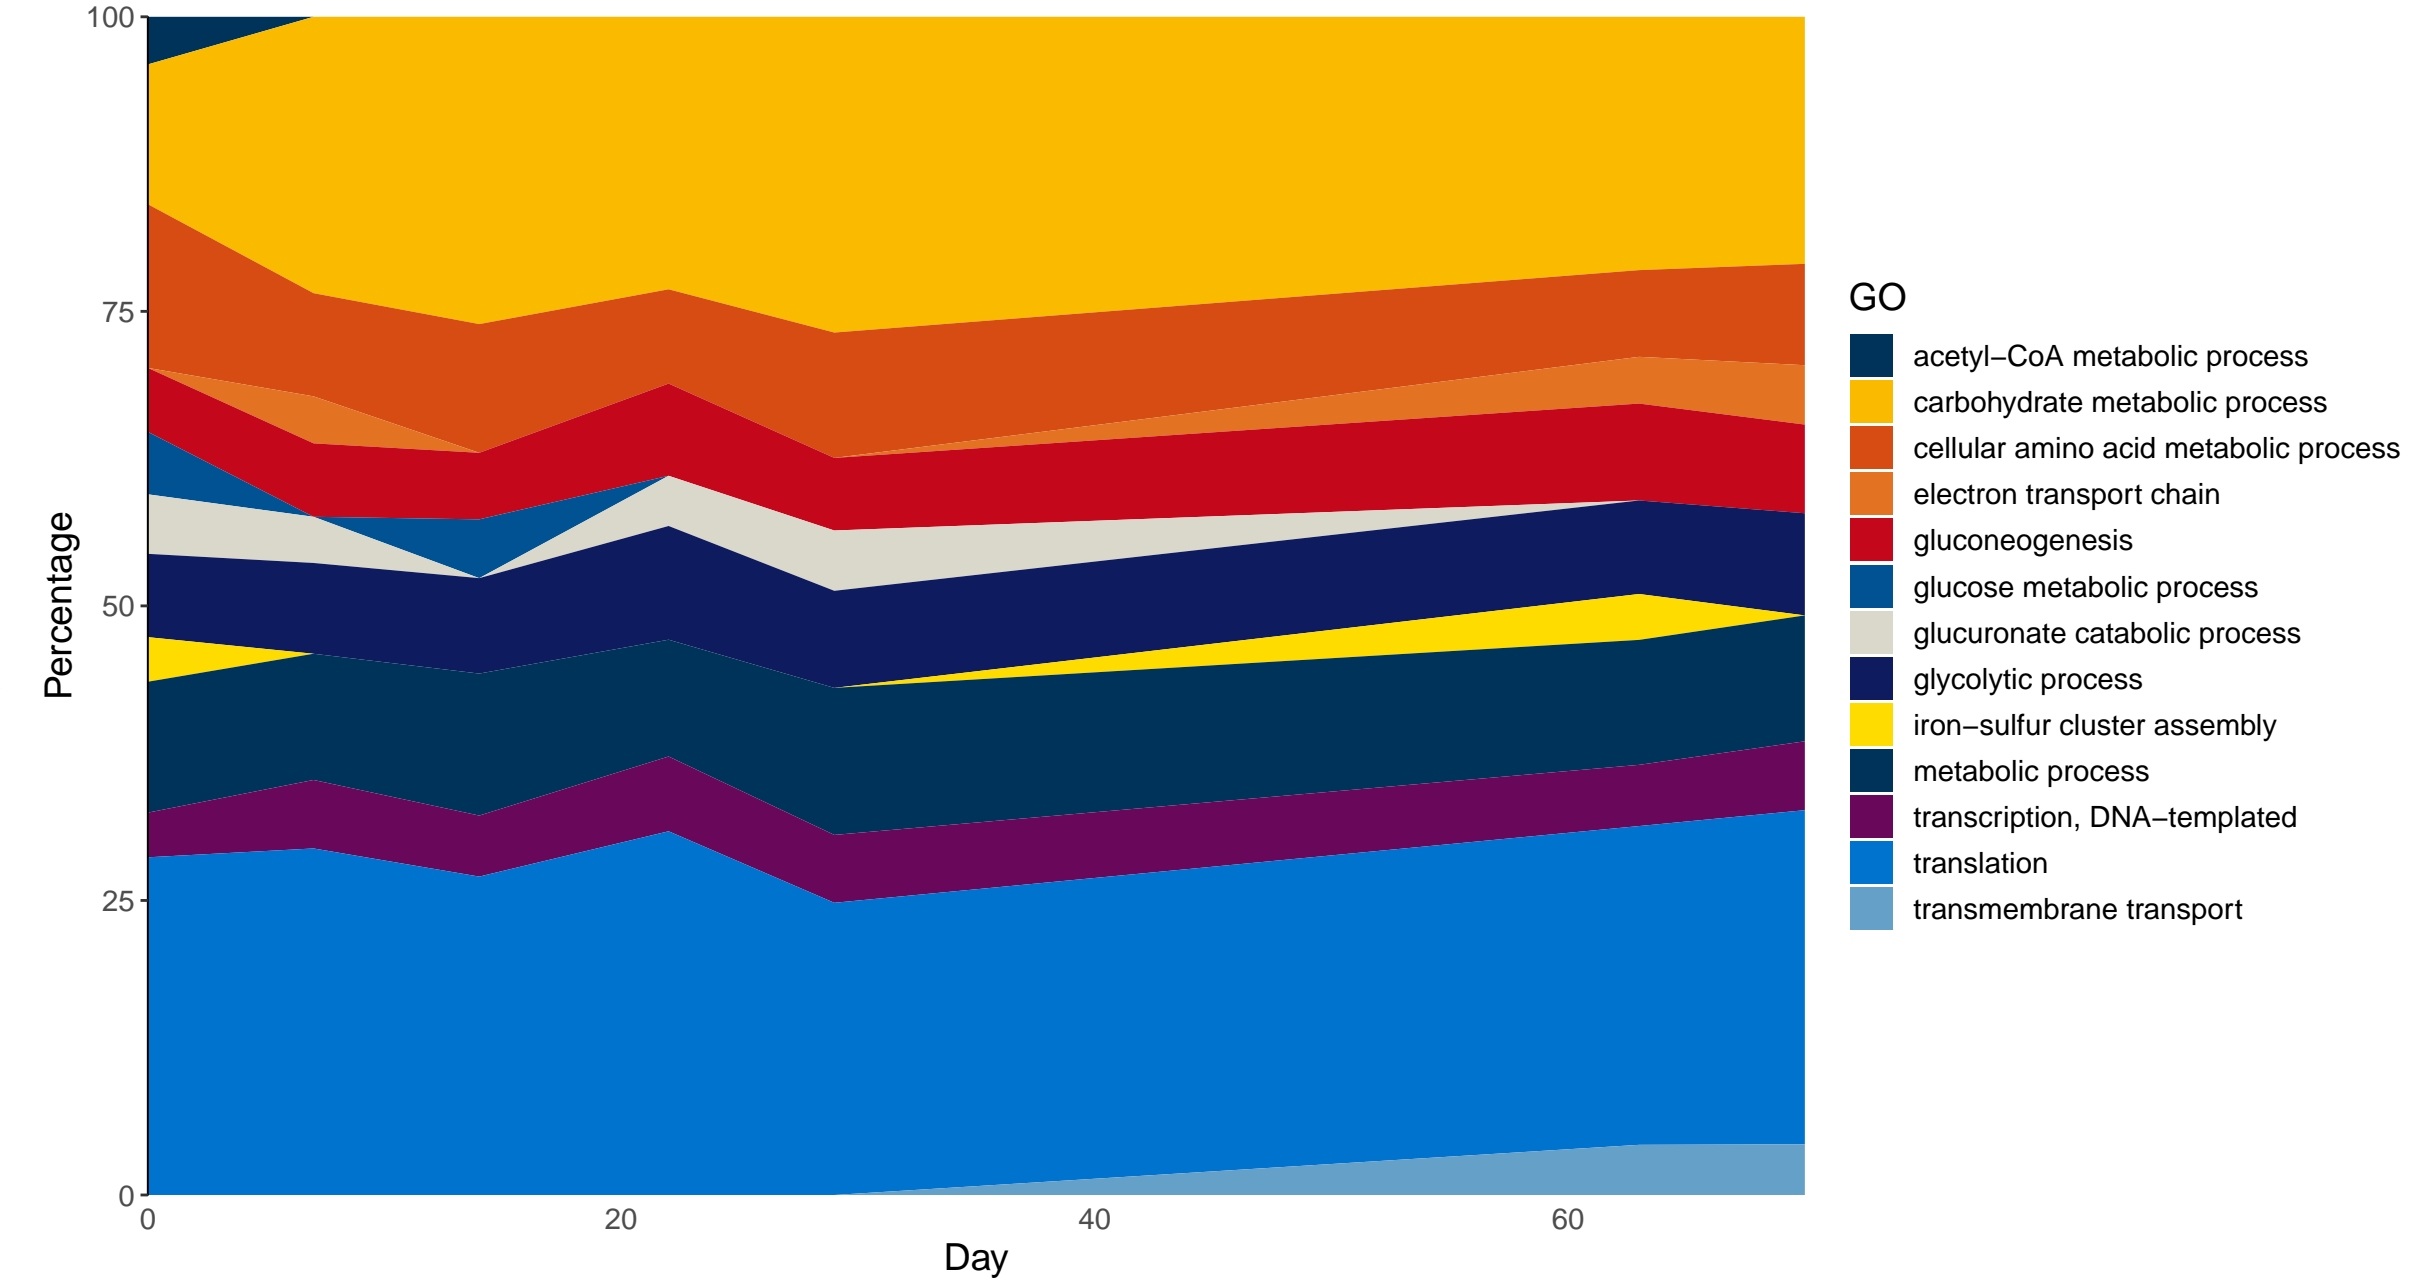

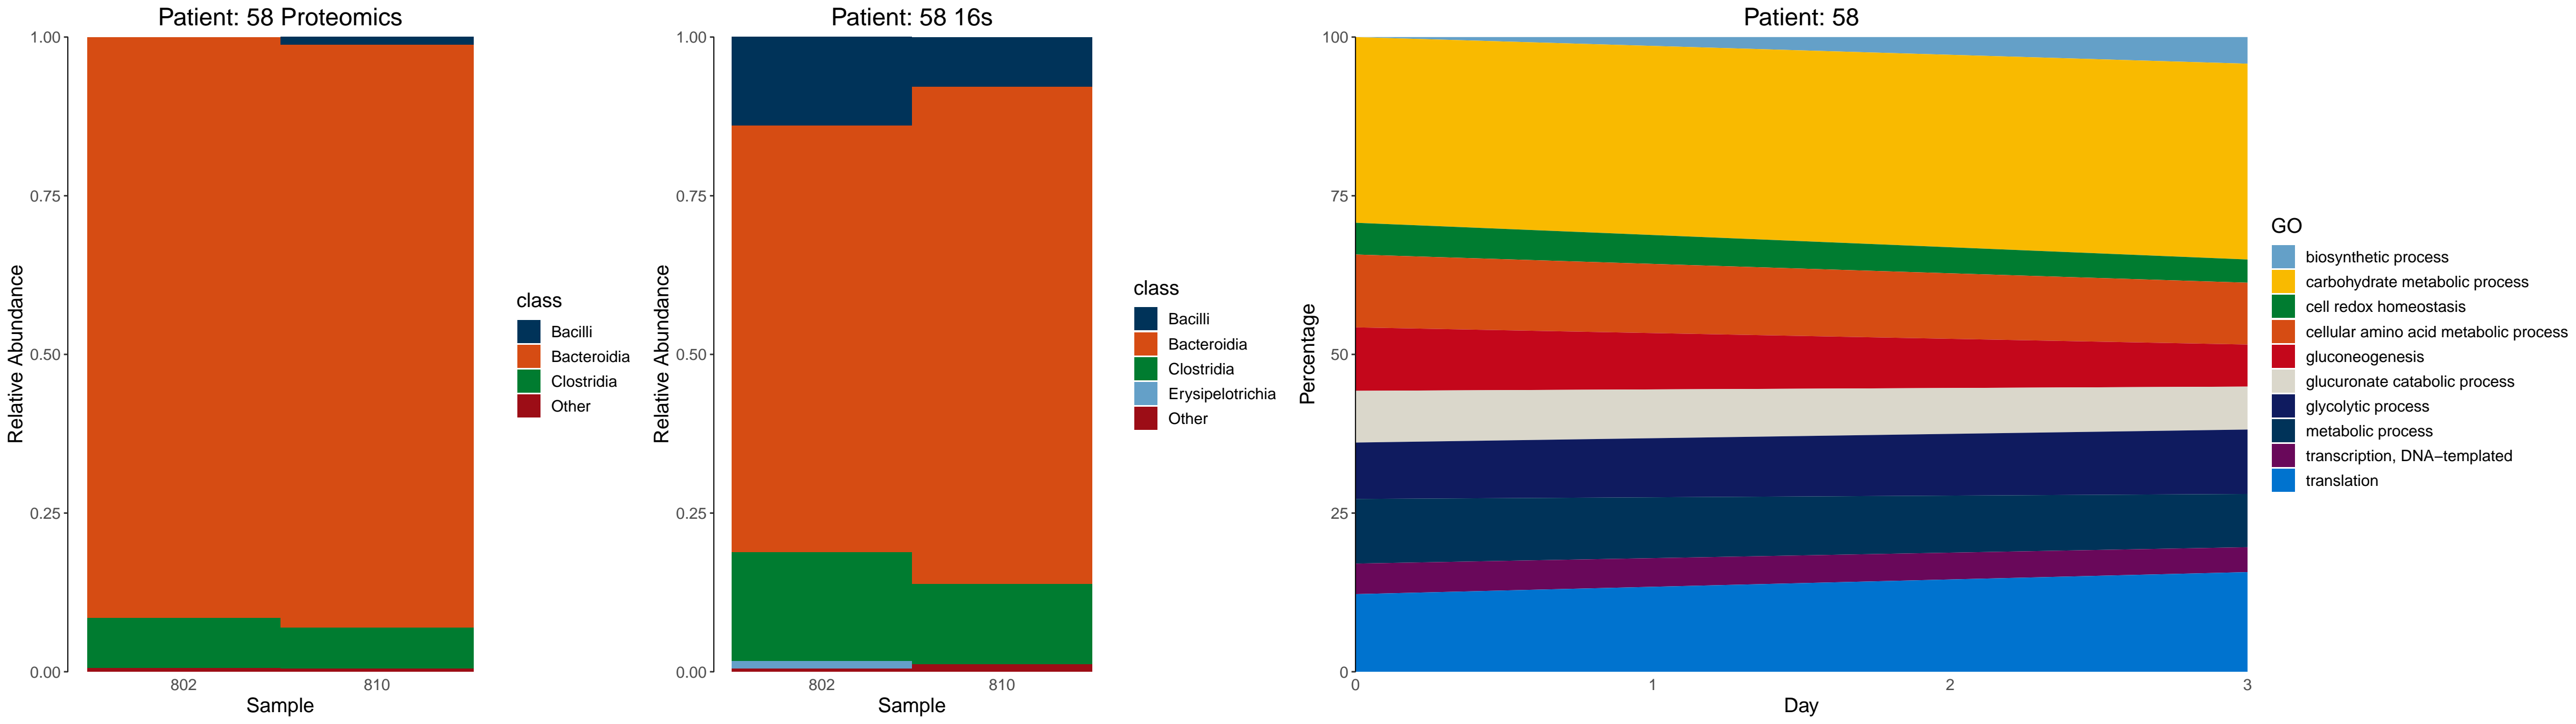



Patient: 59 Proteomics

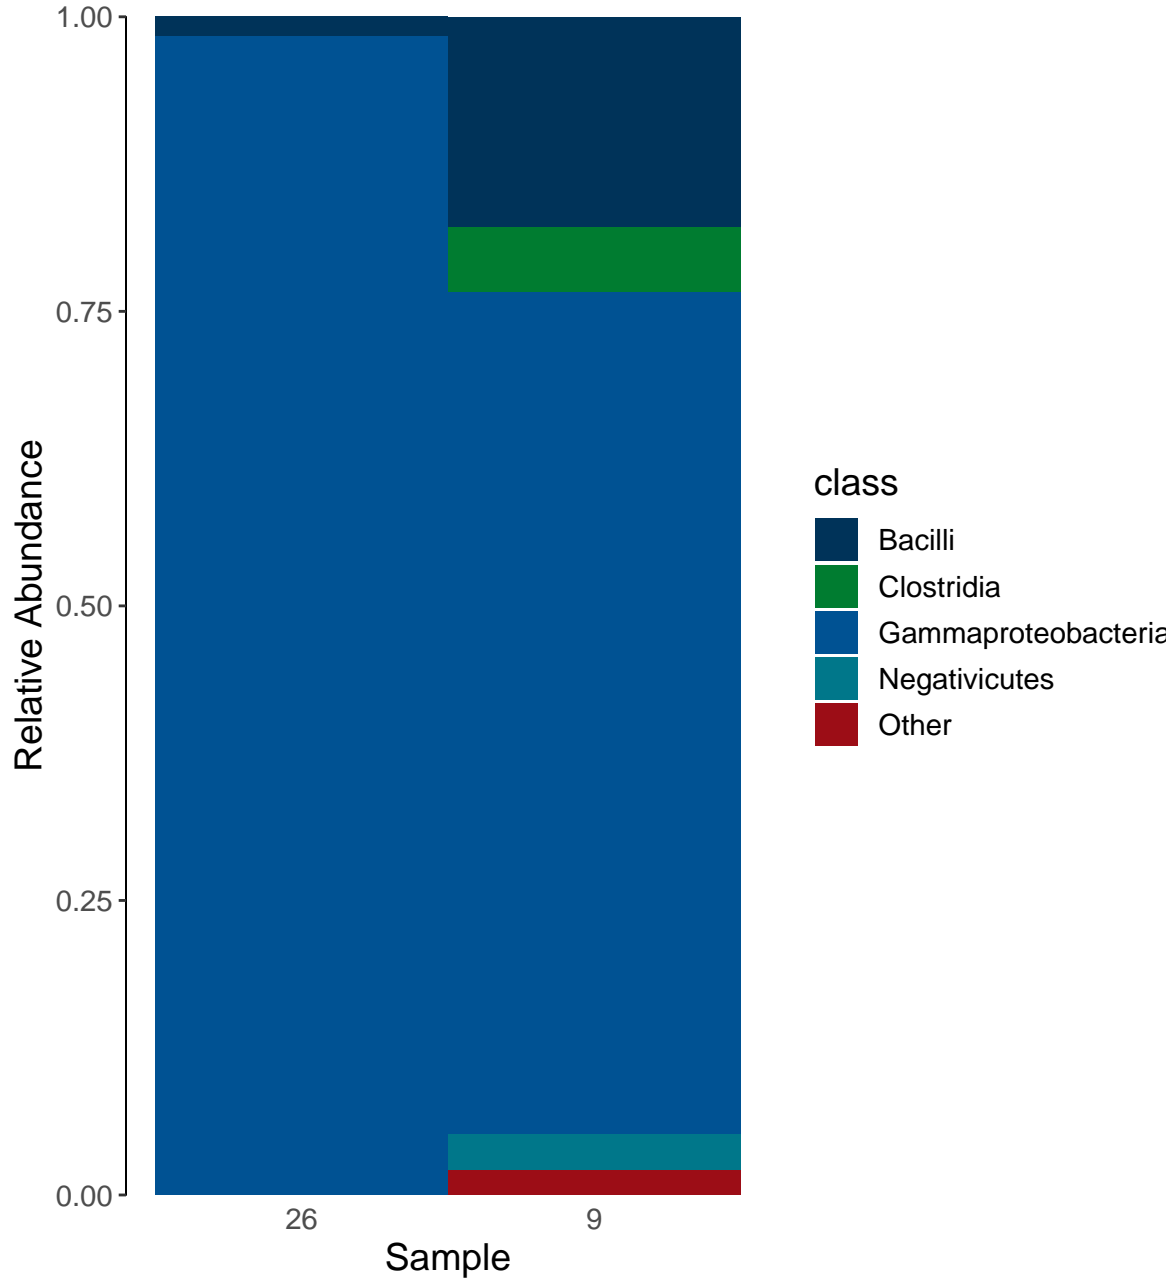

Patient: 59 16s

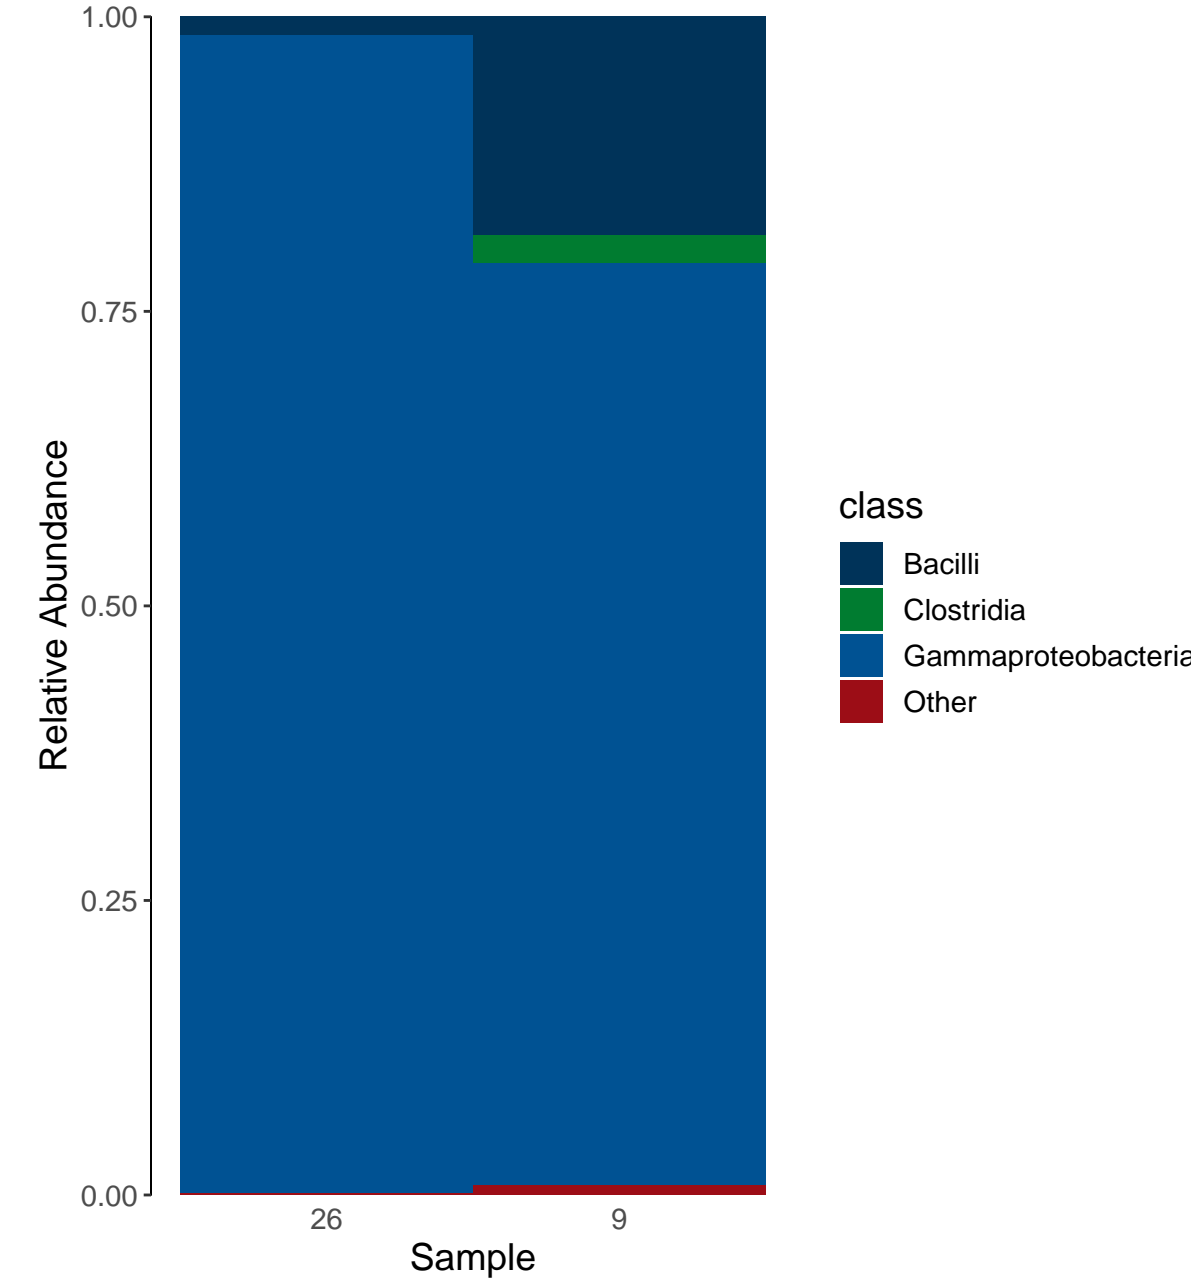

Patient: 59

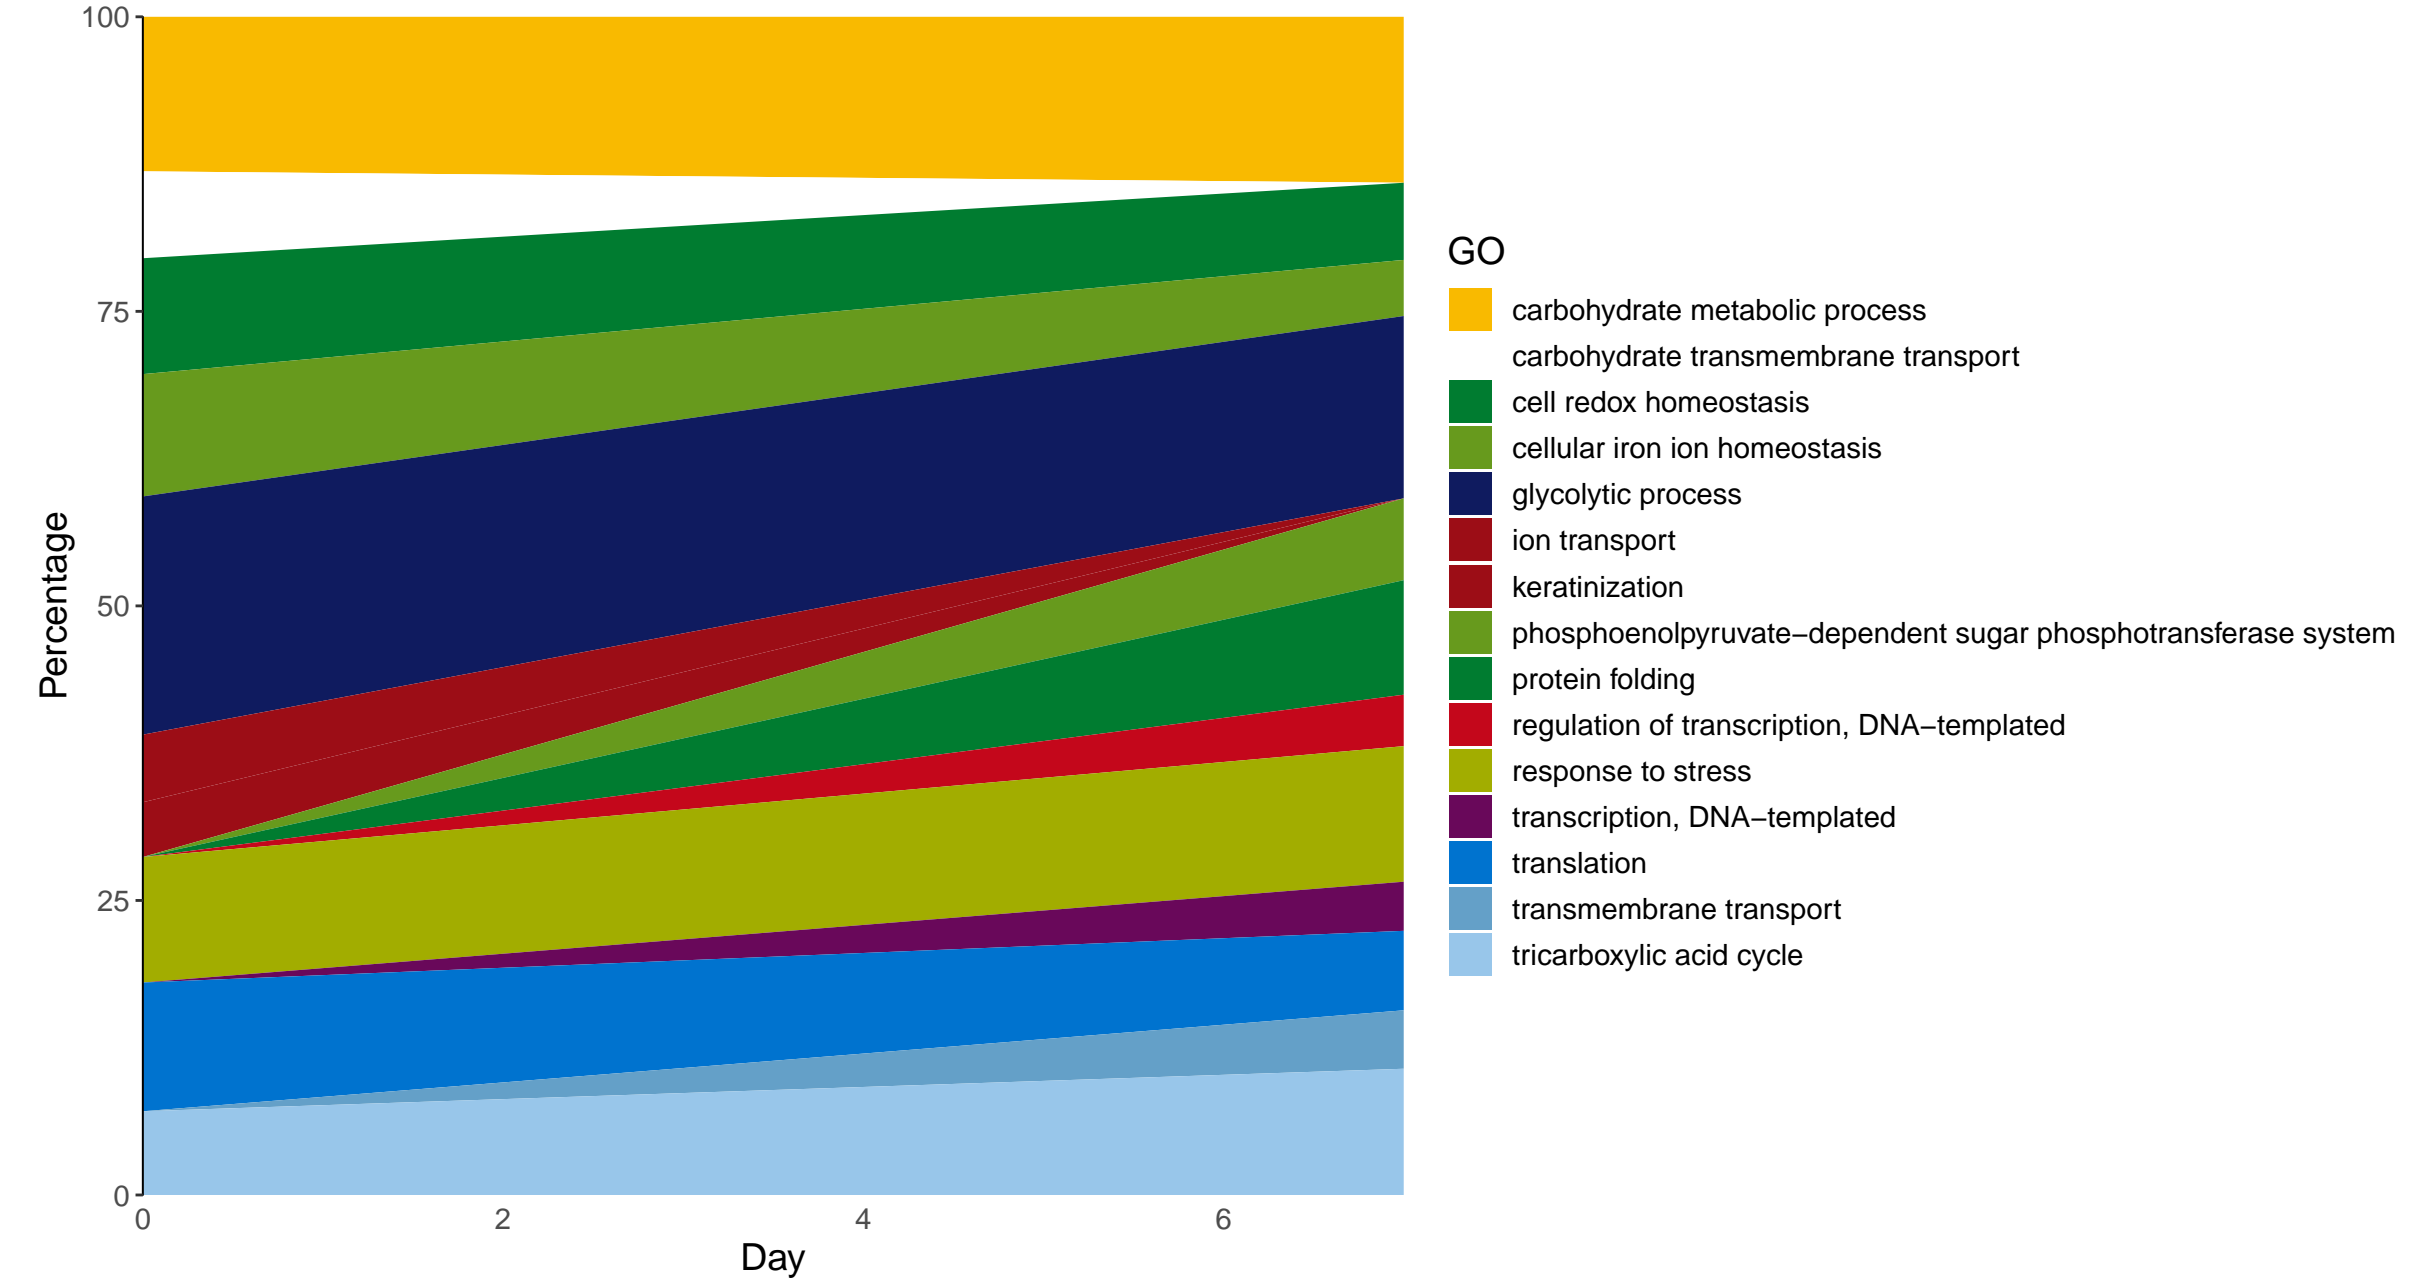

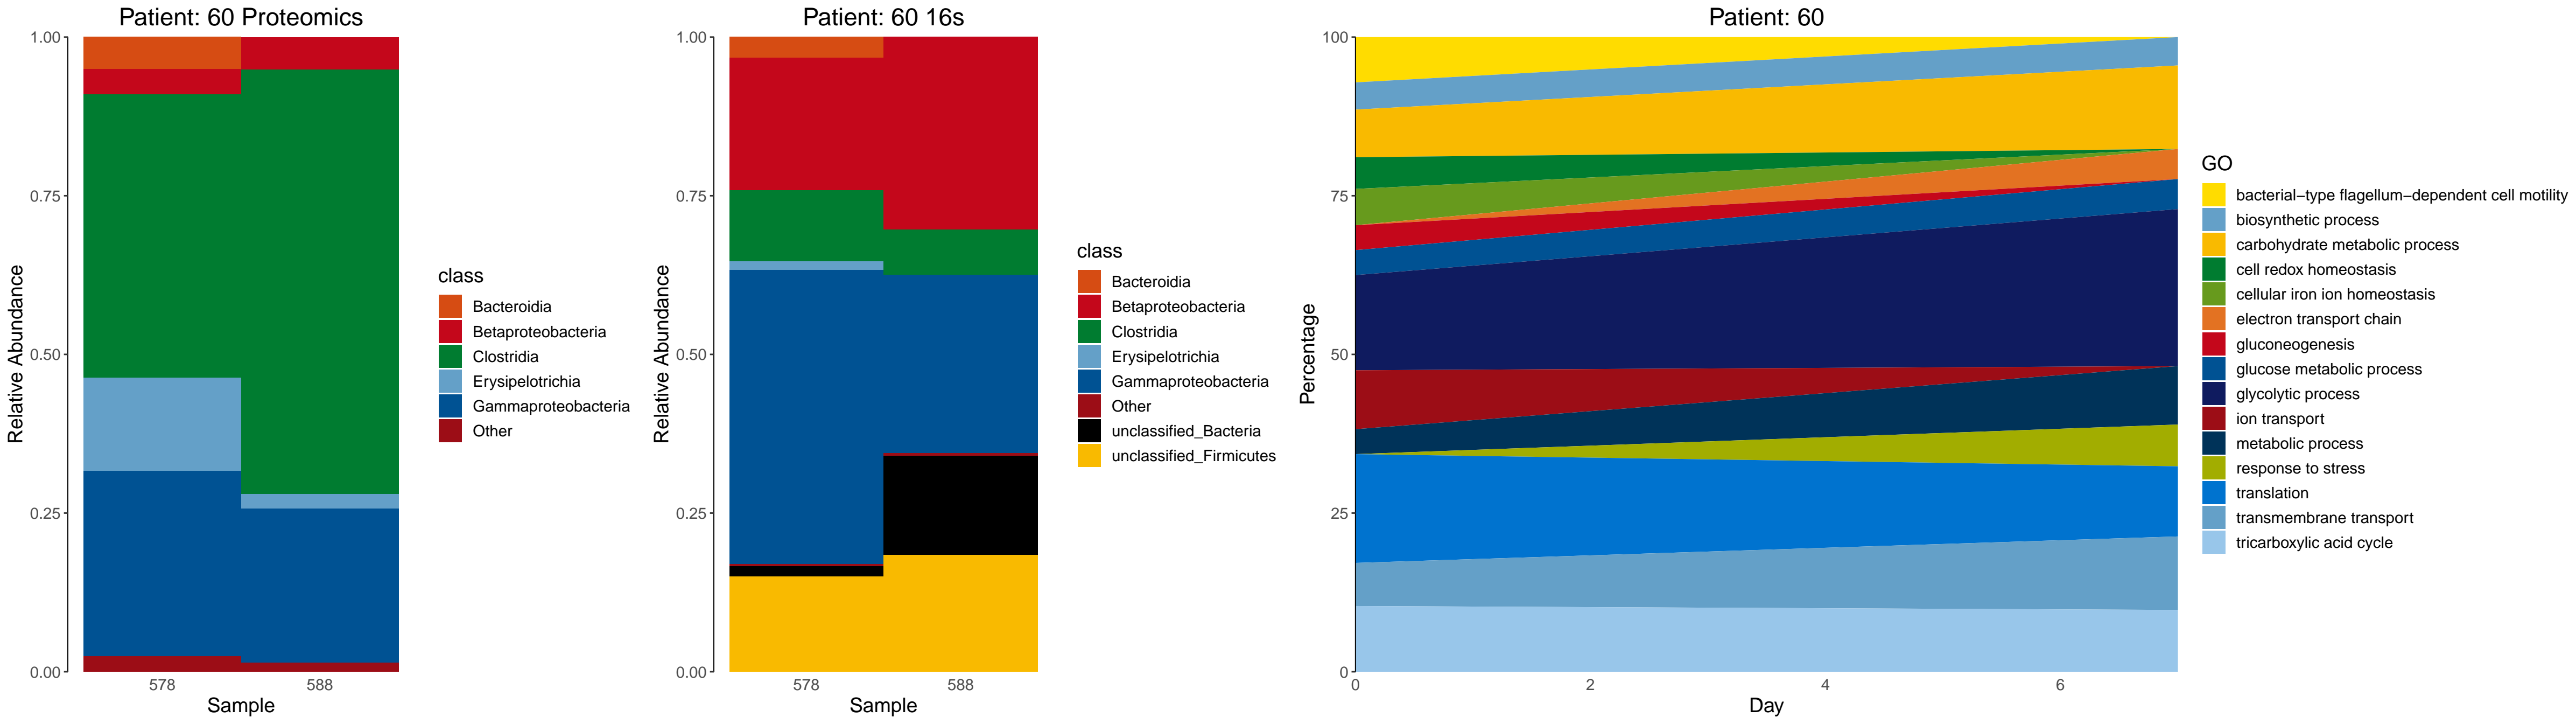

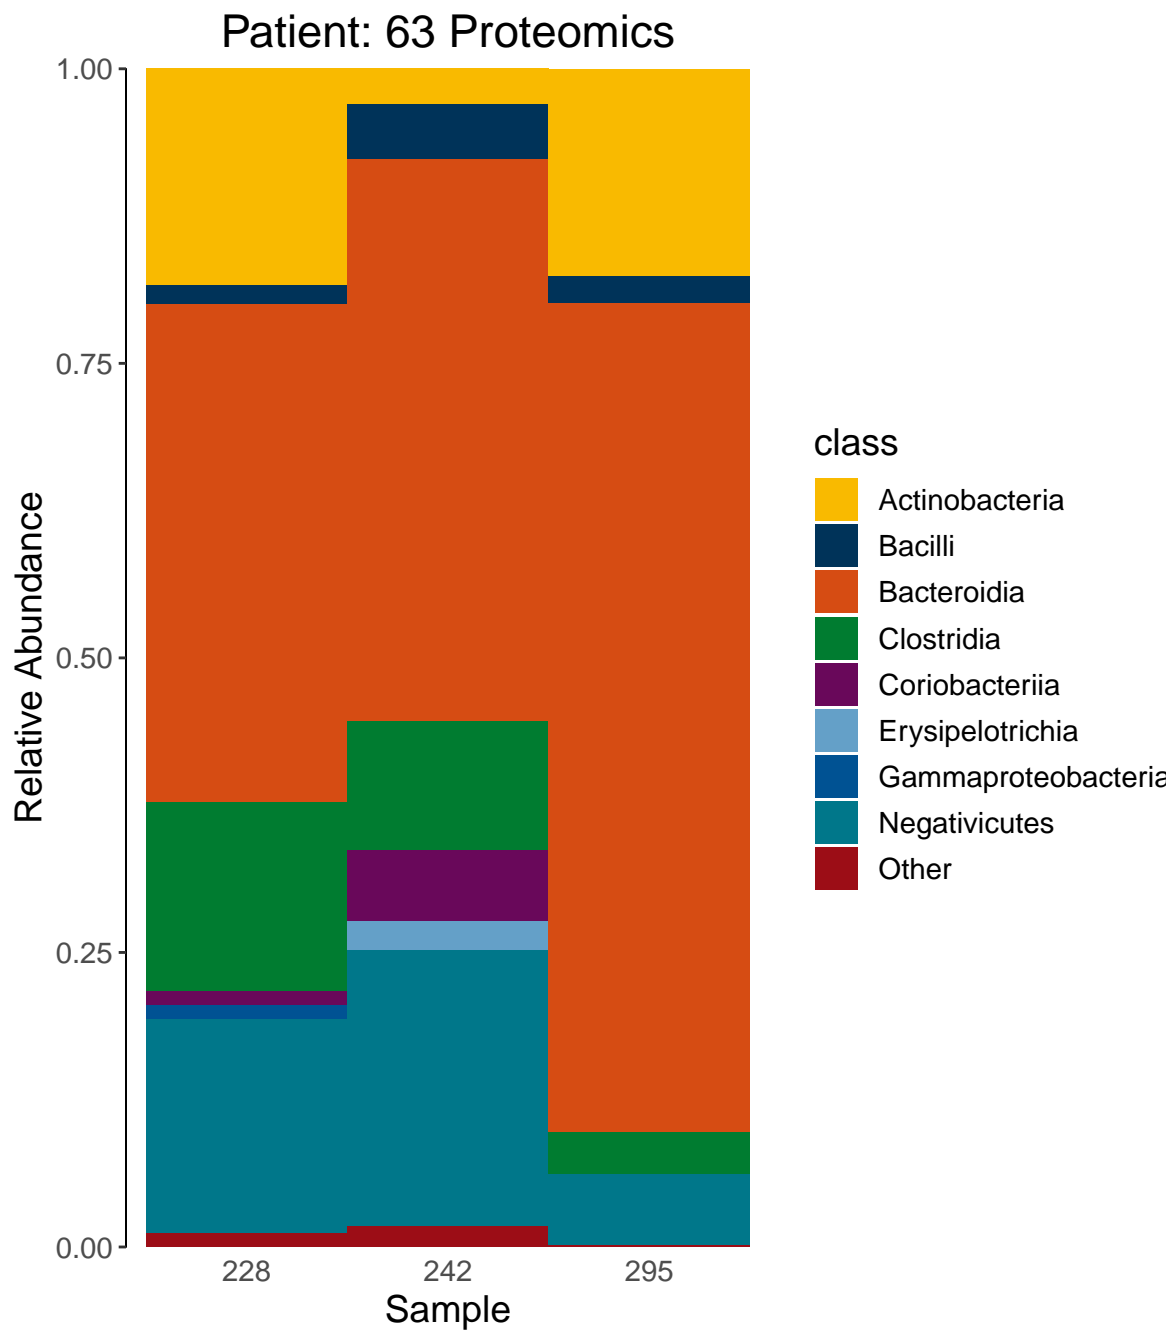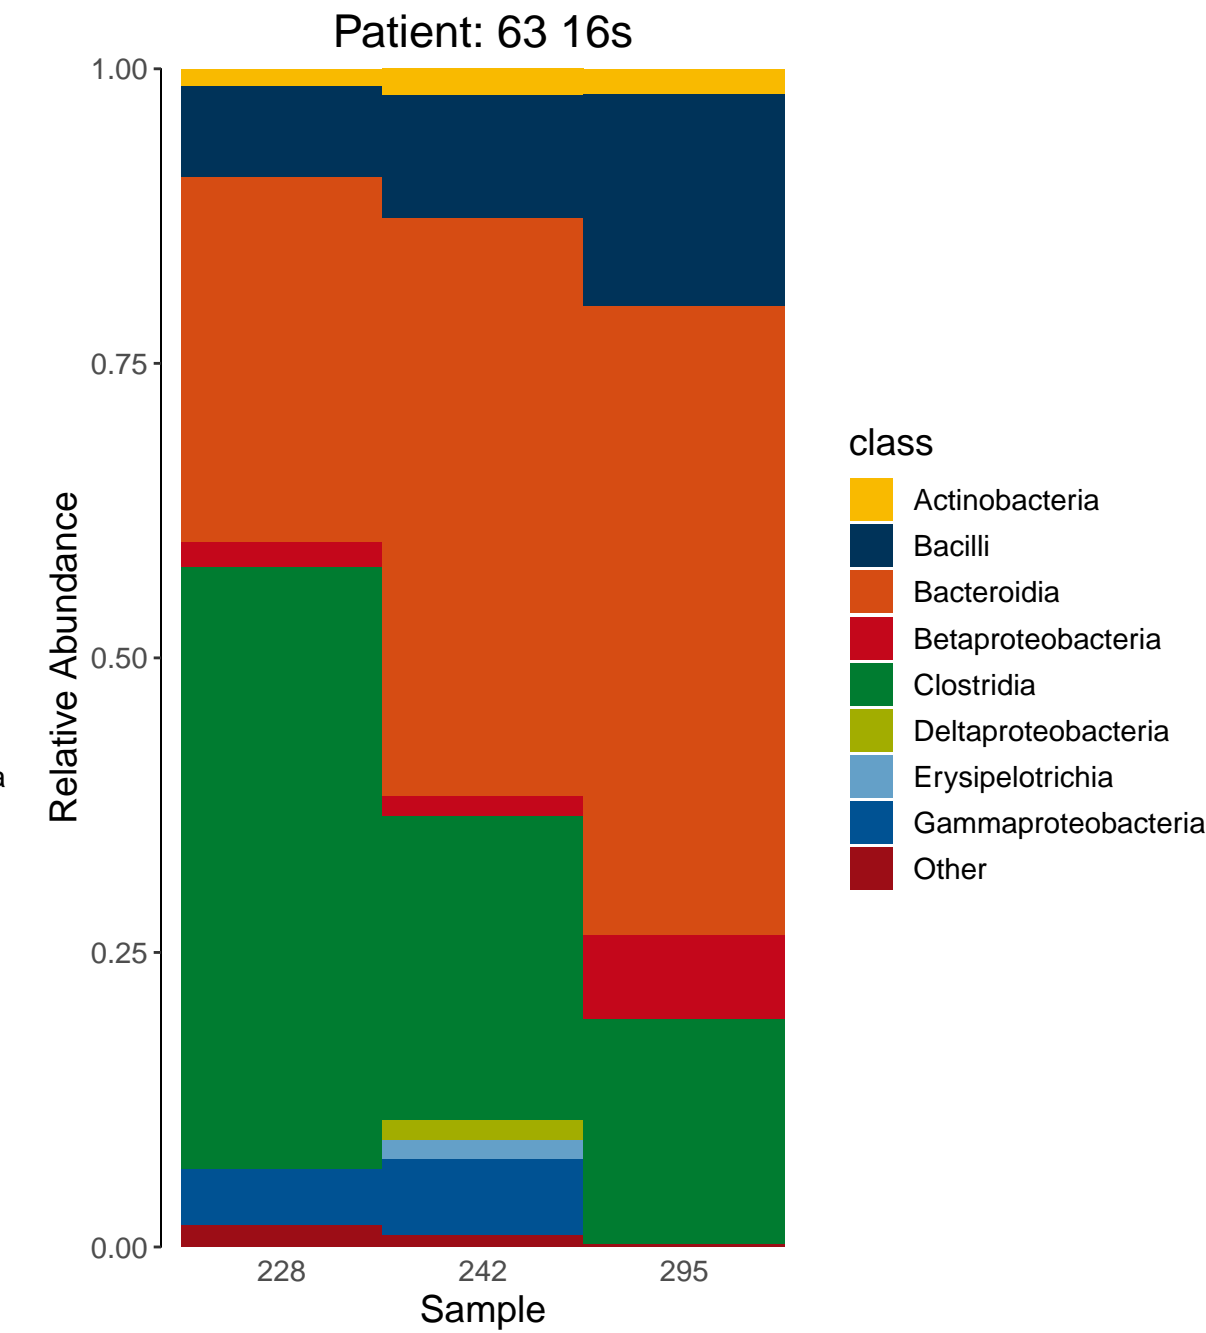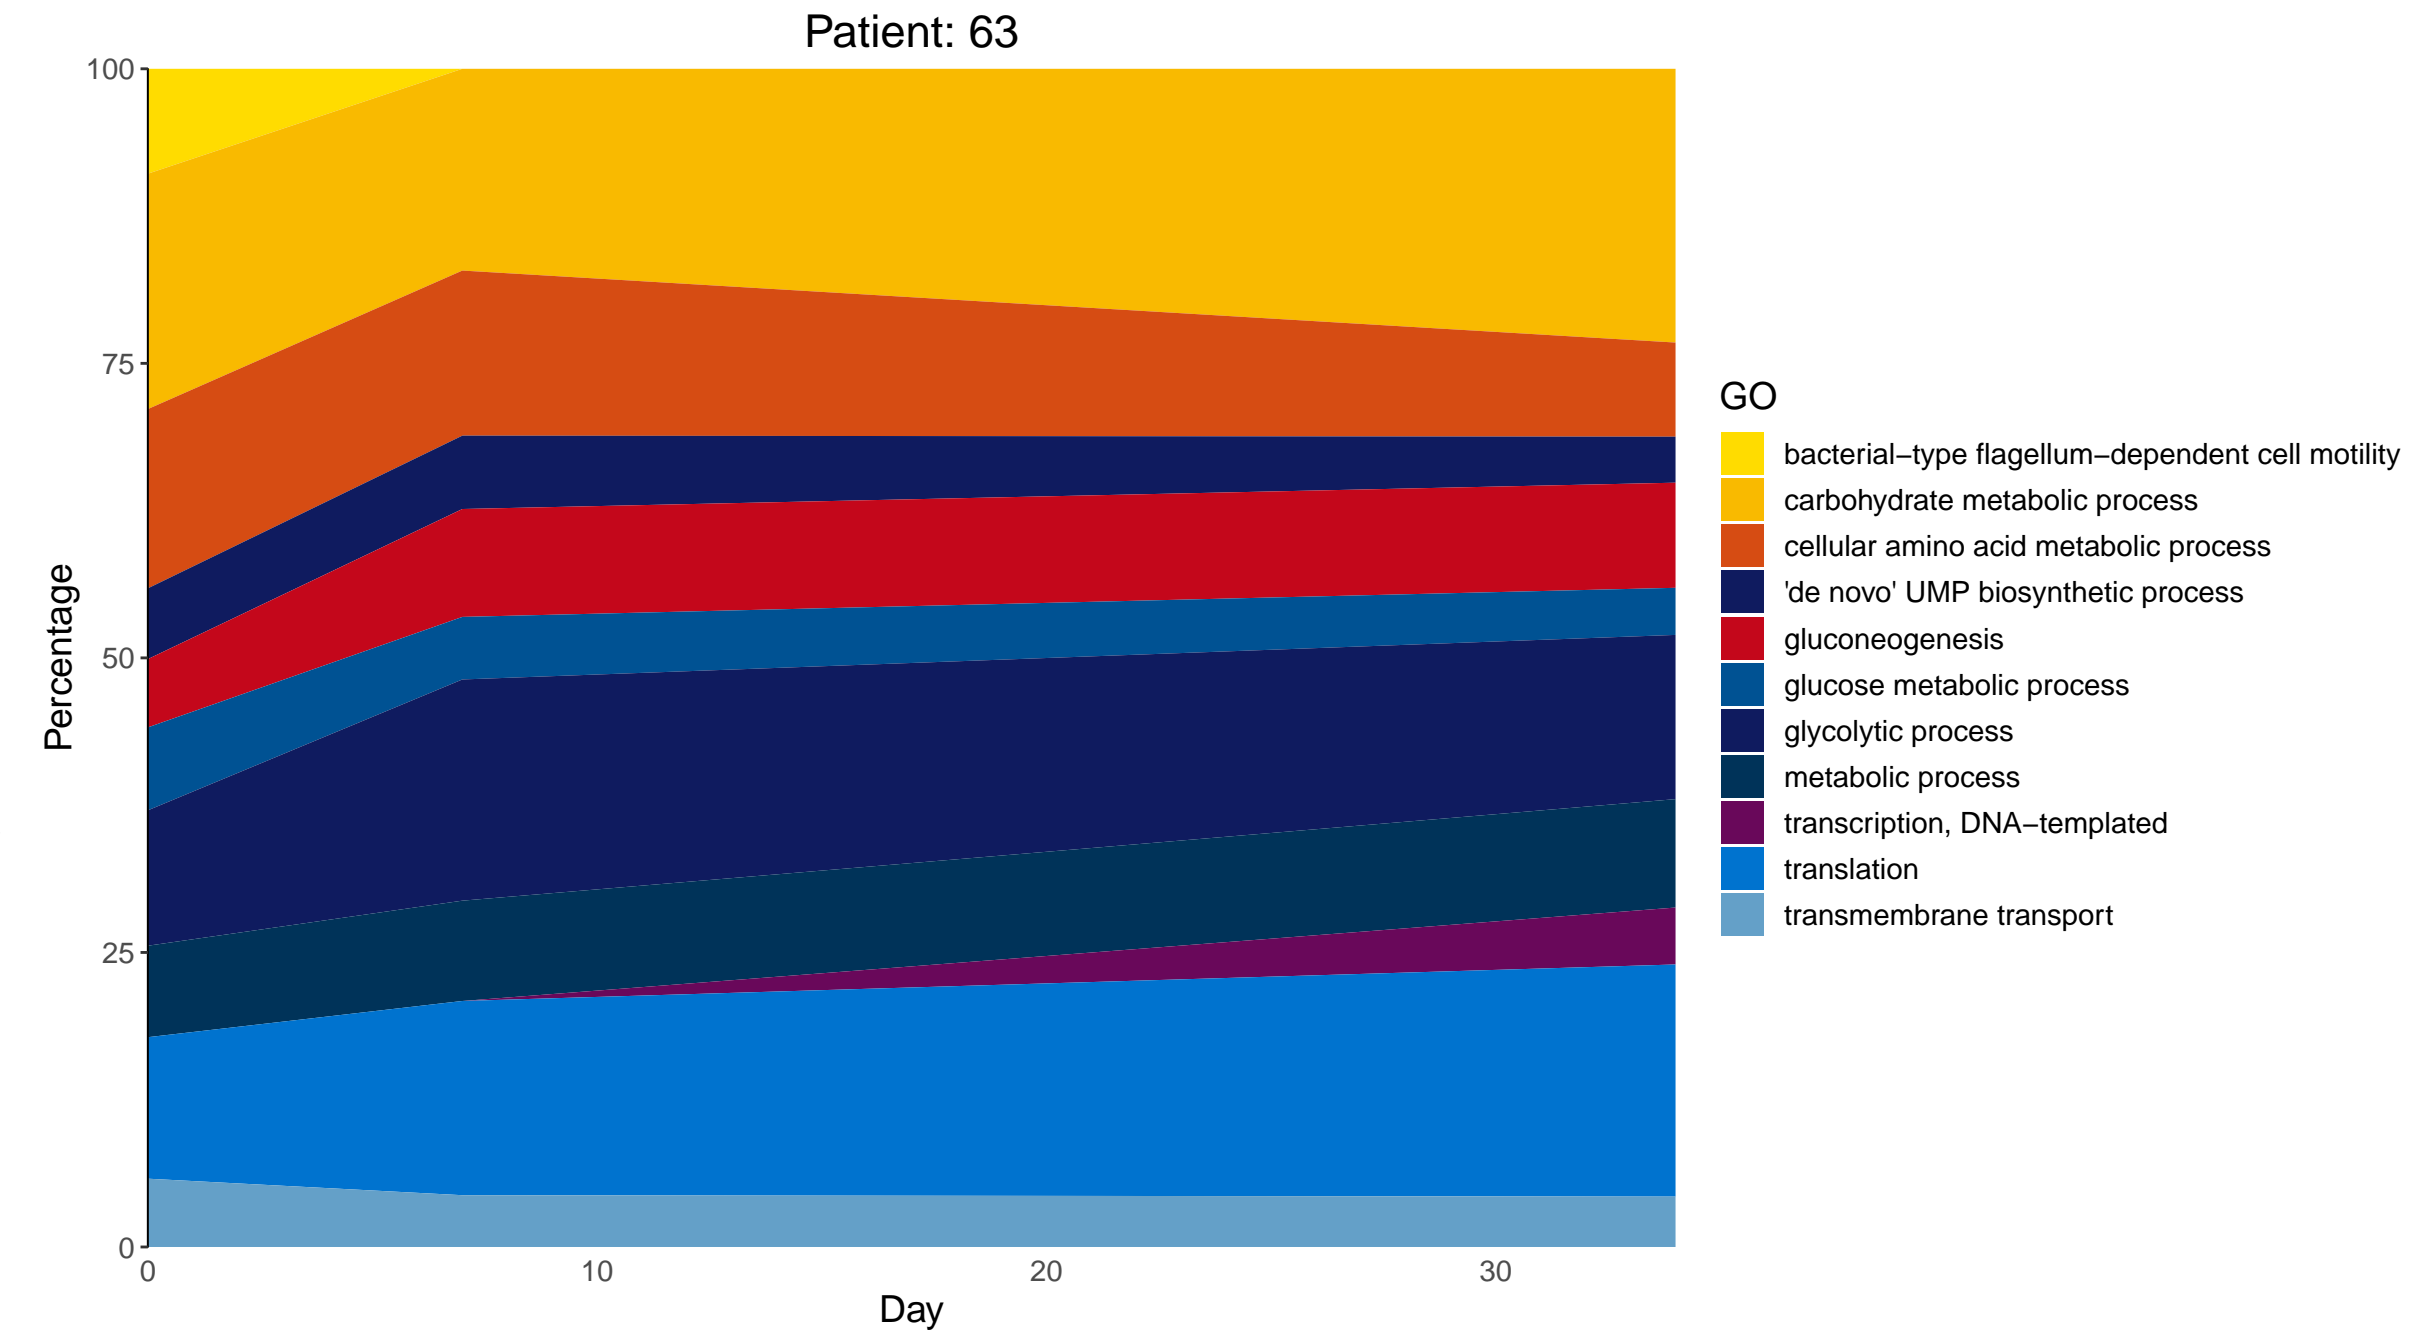

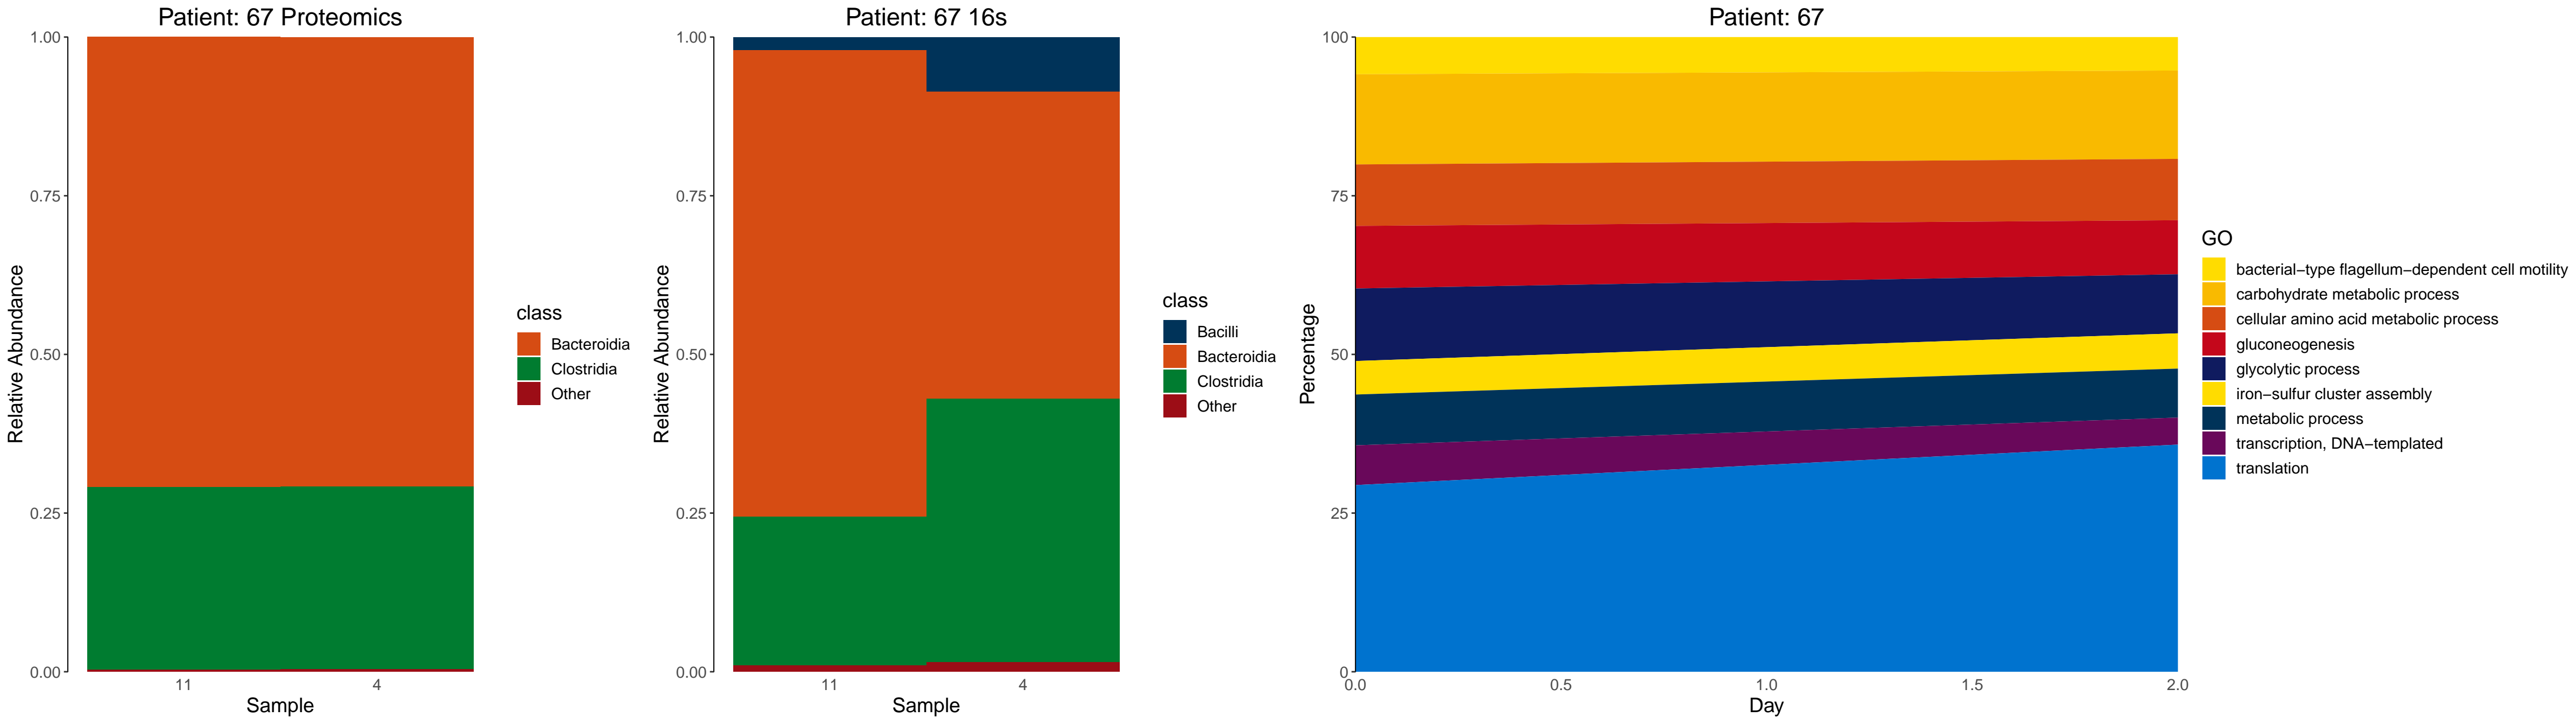

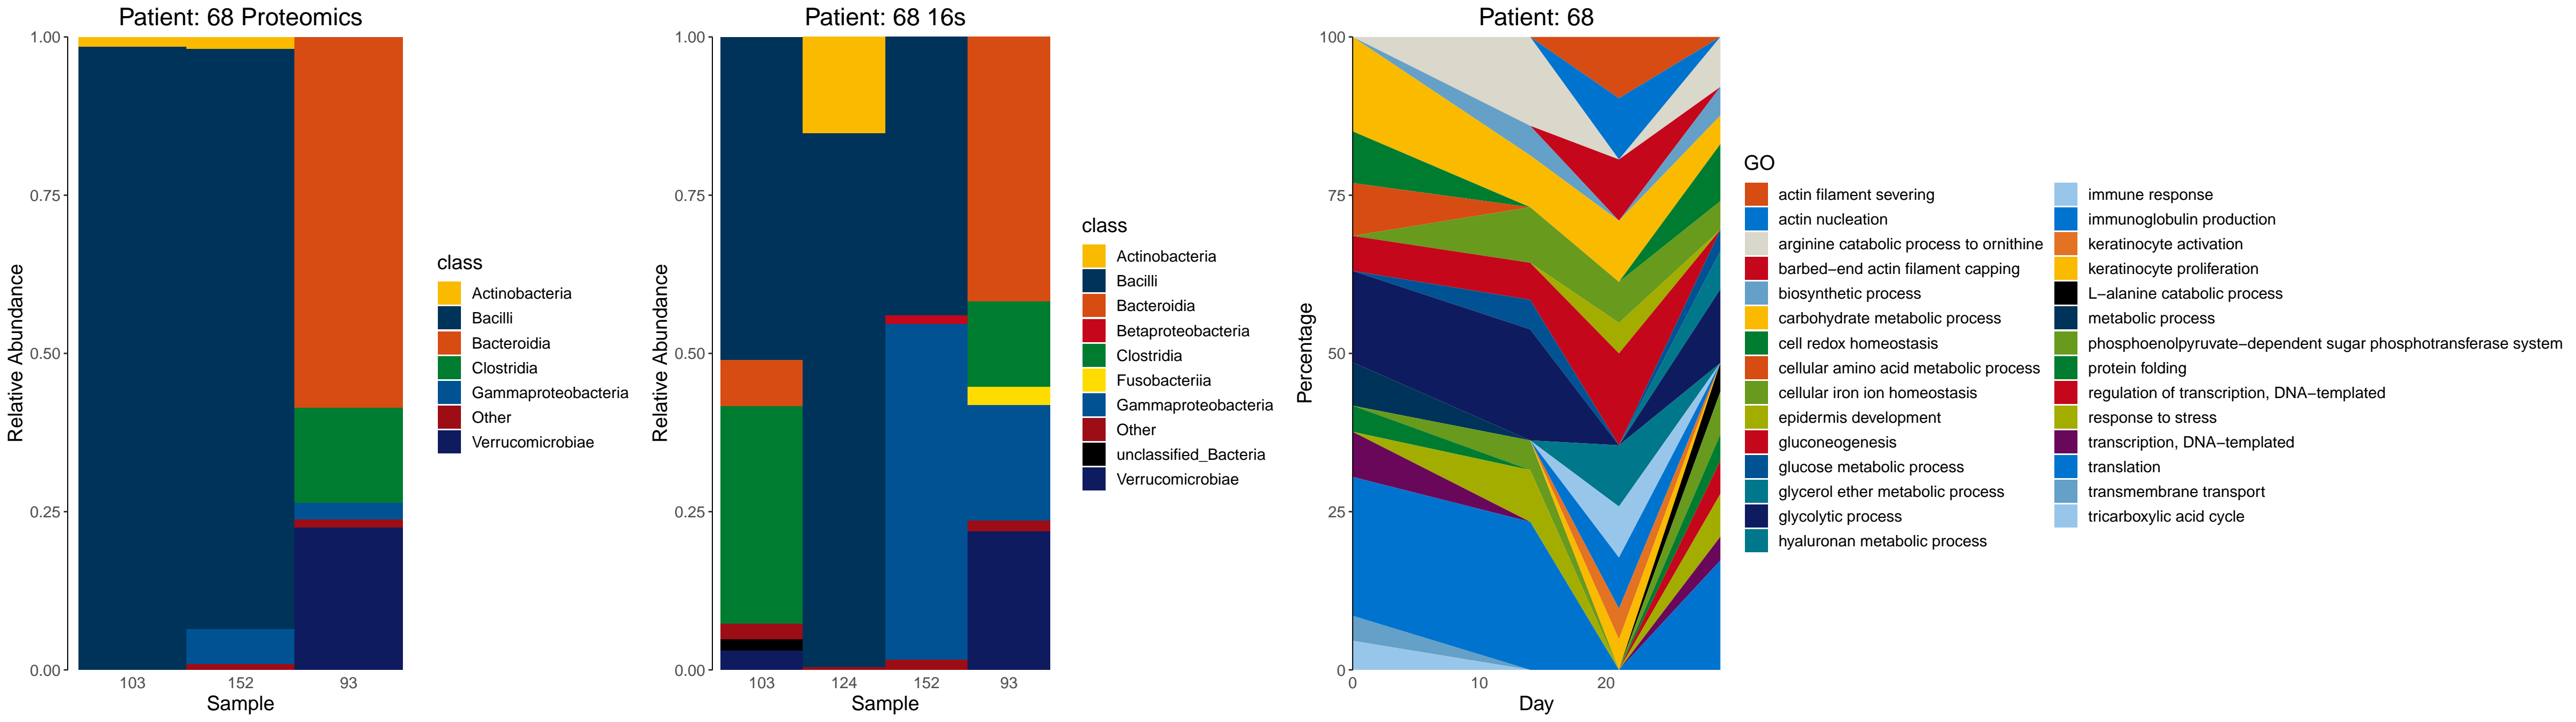



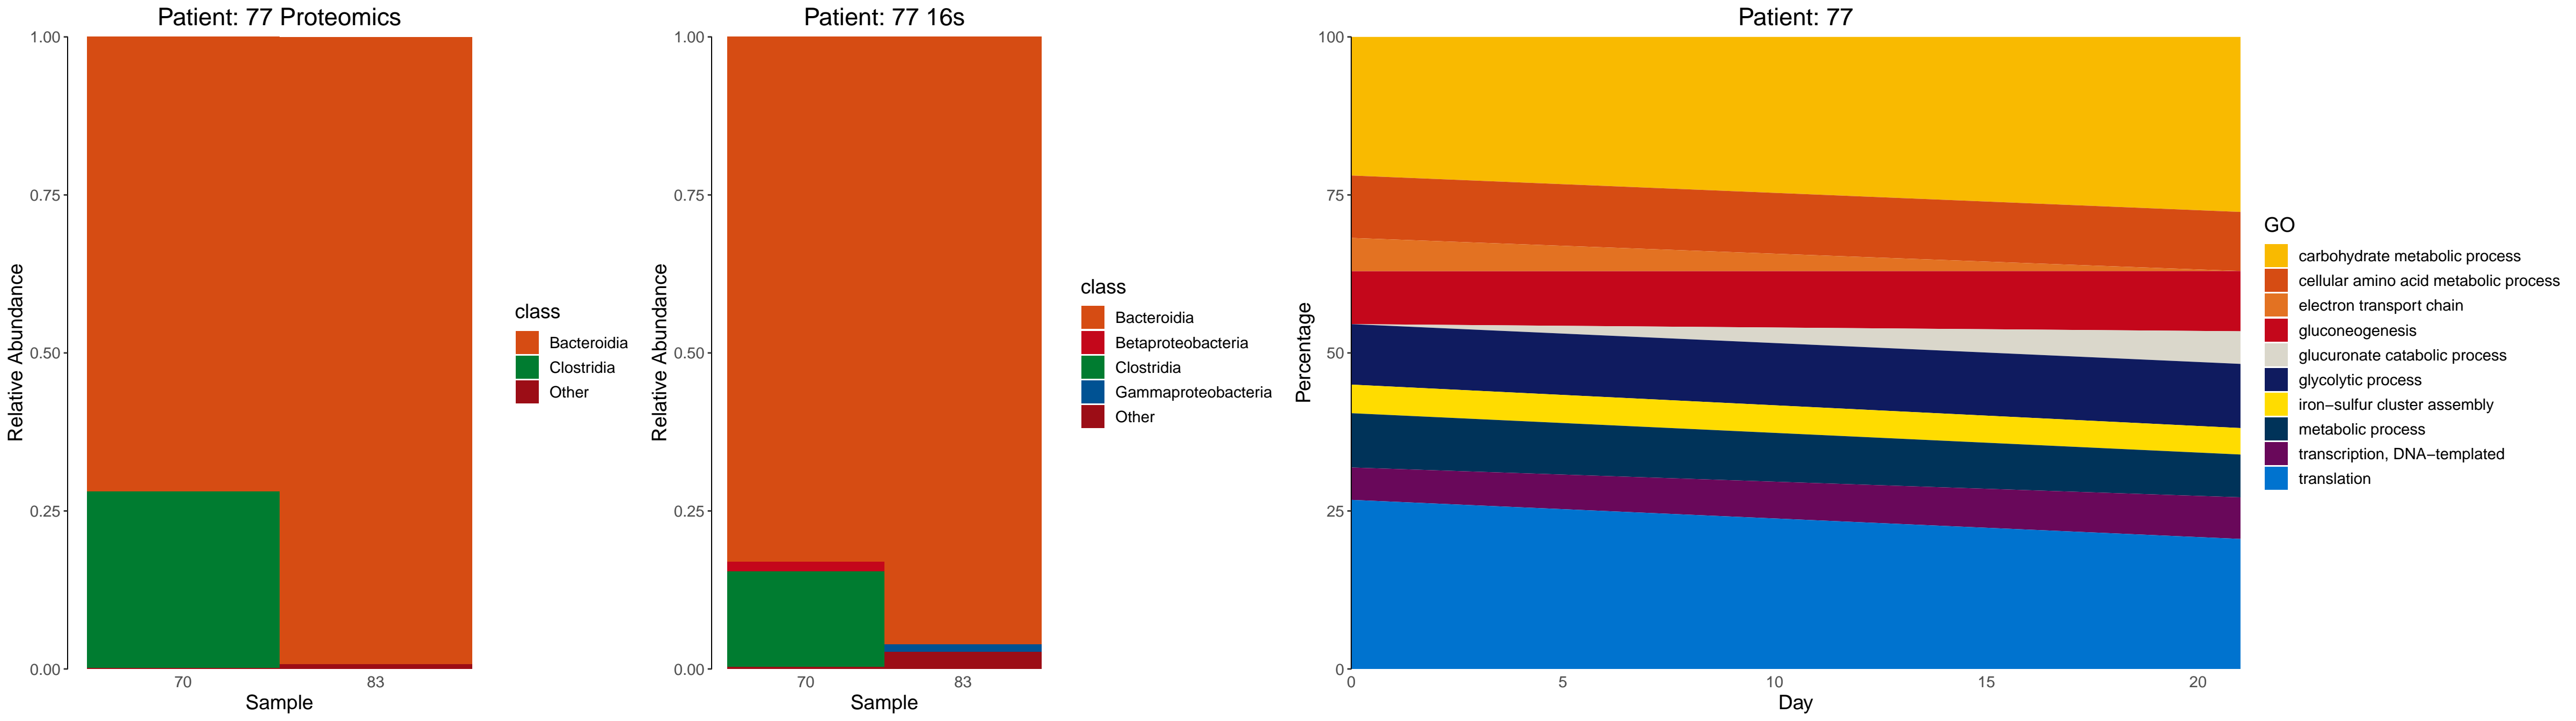

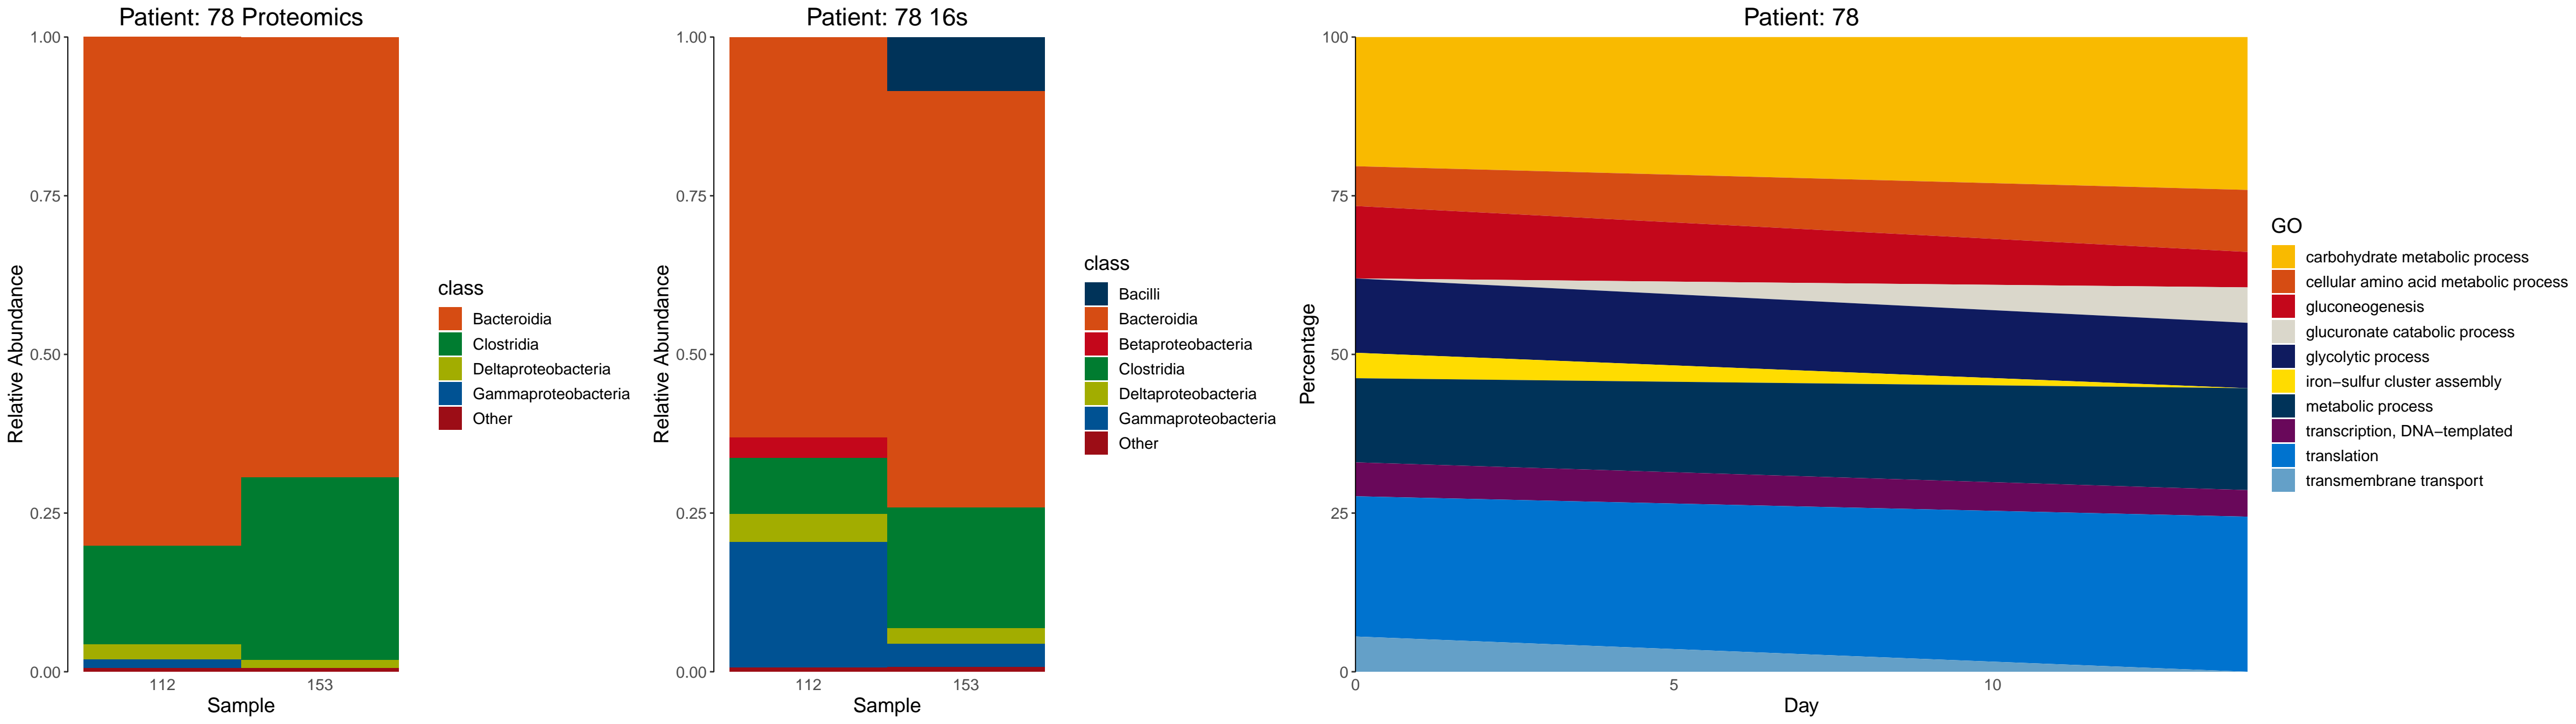



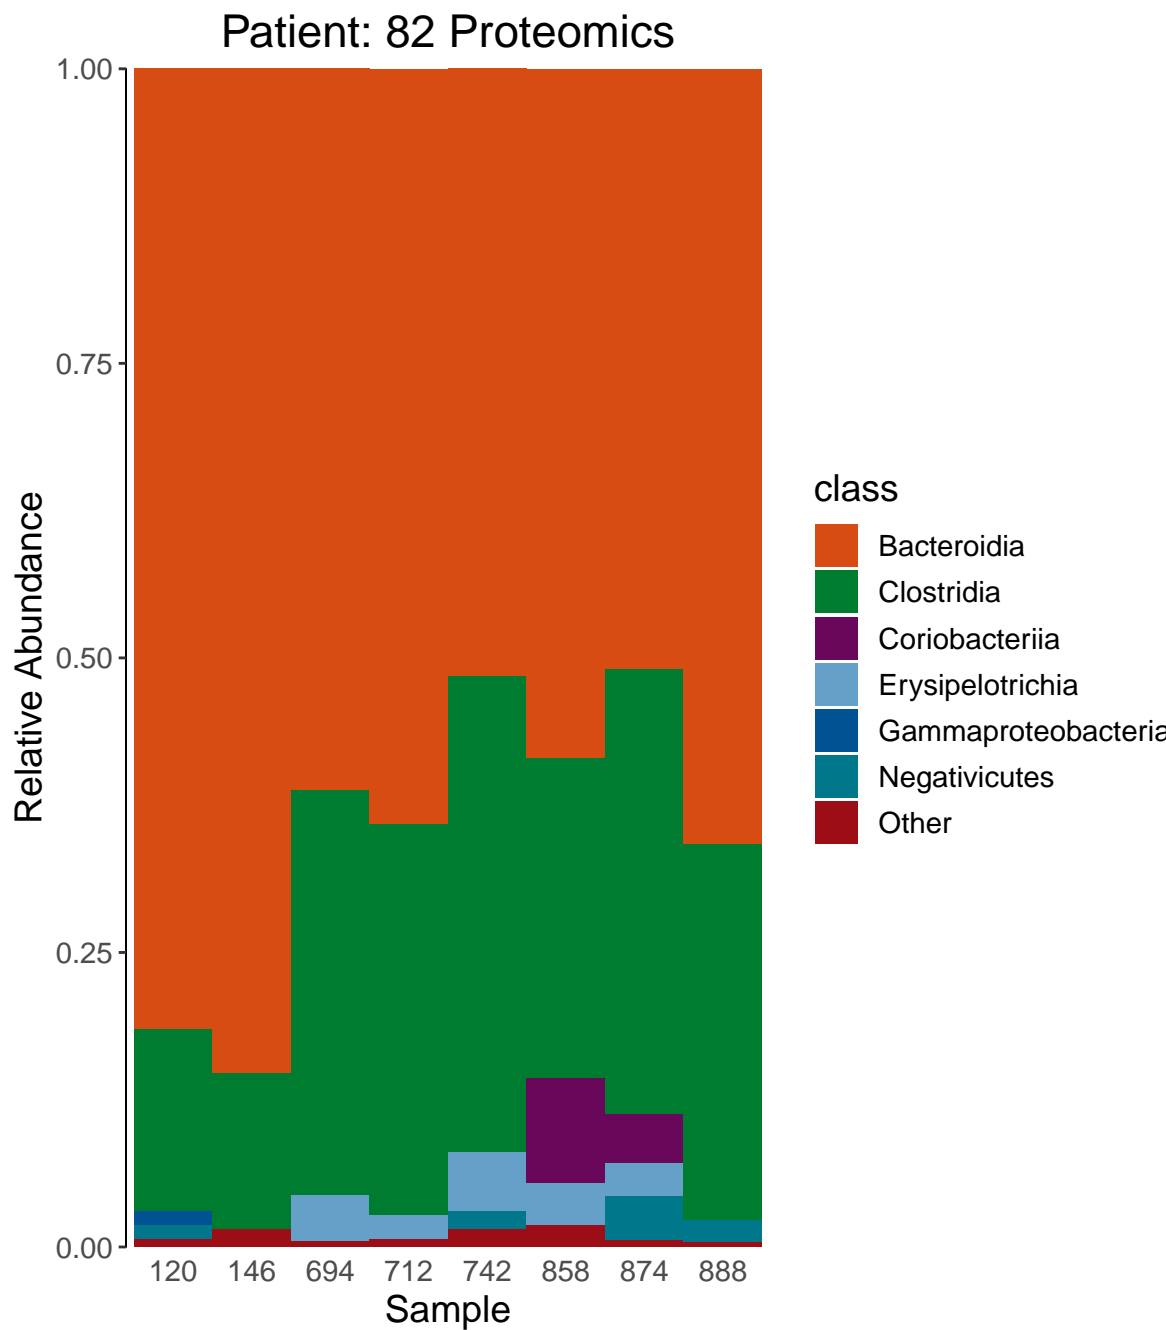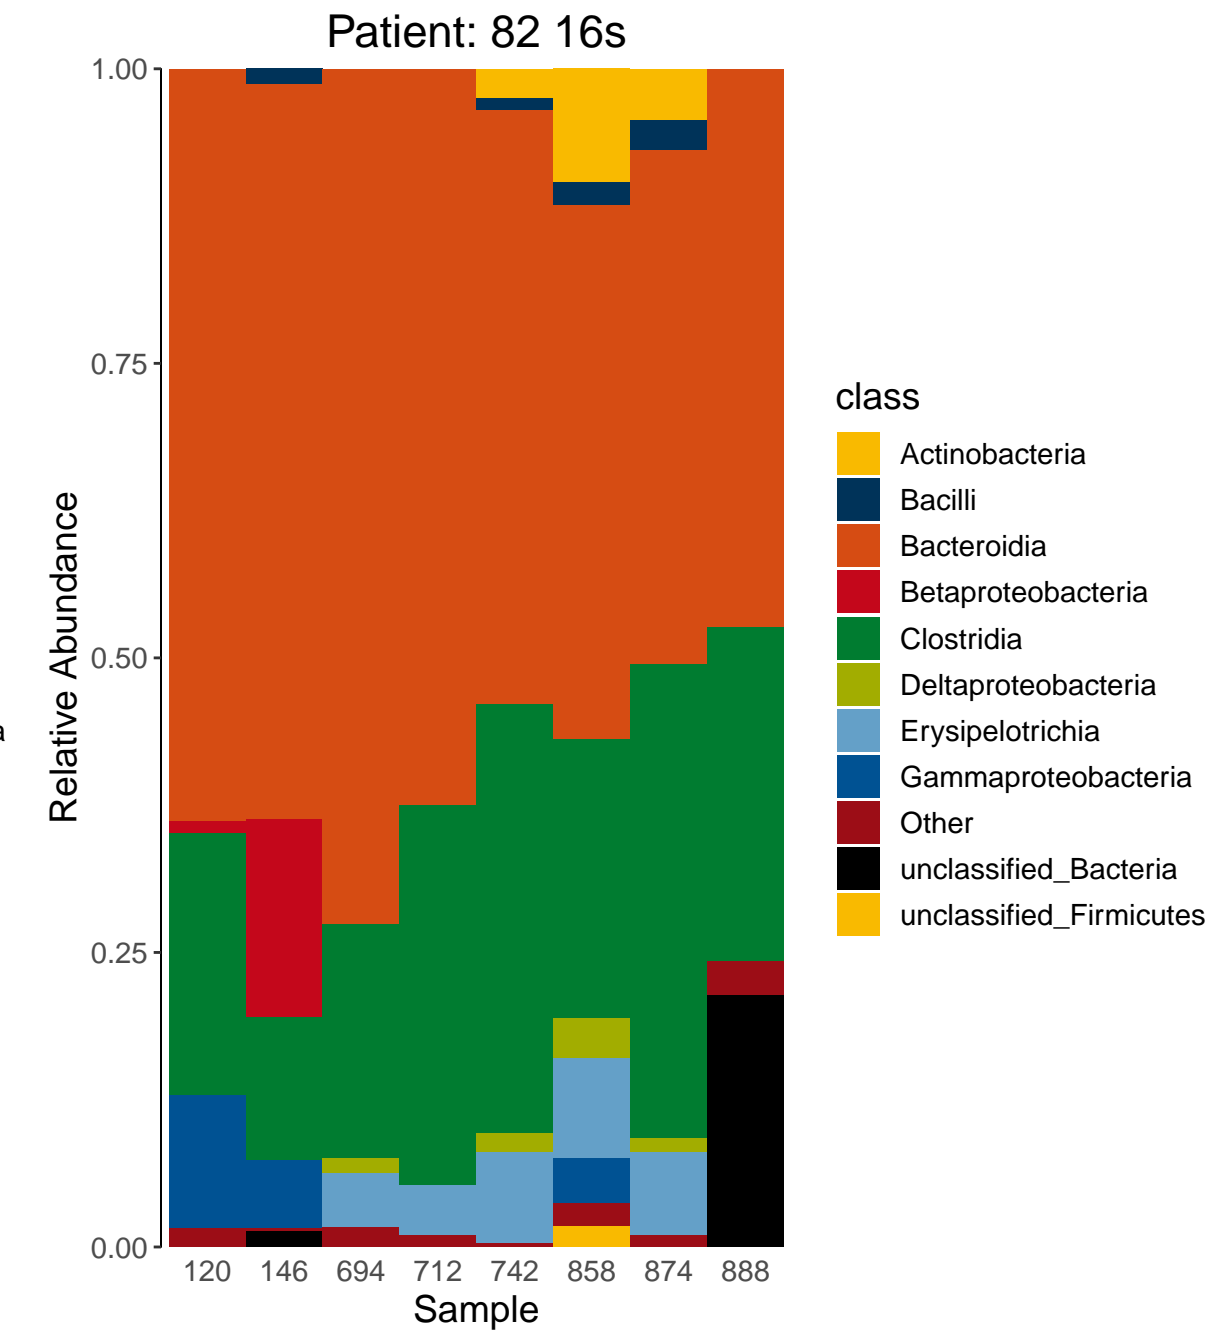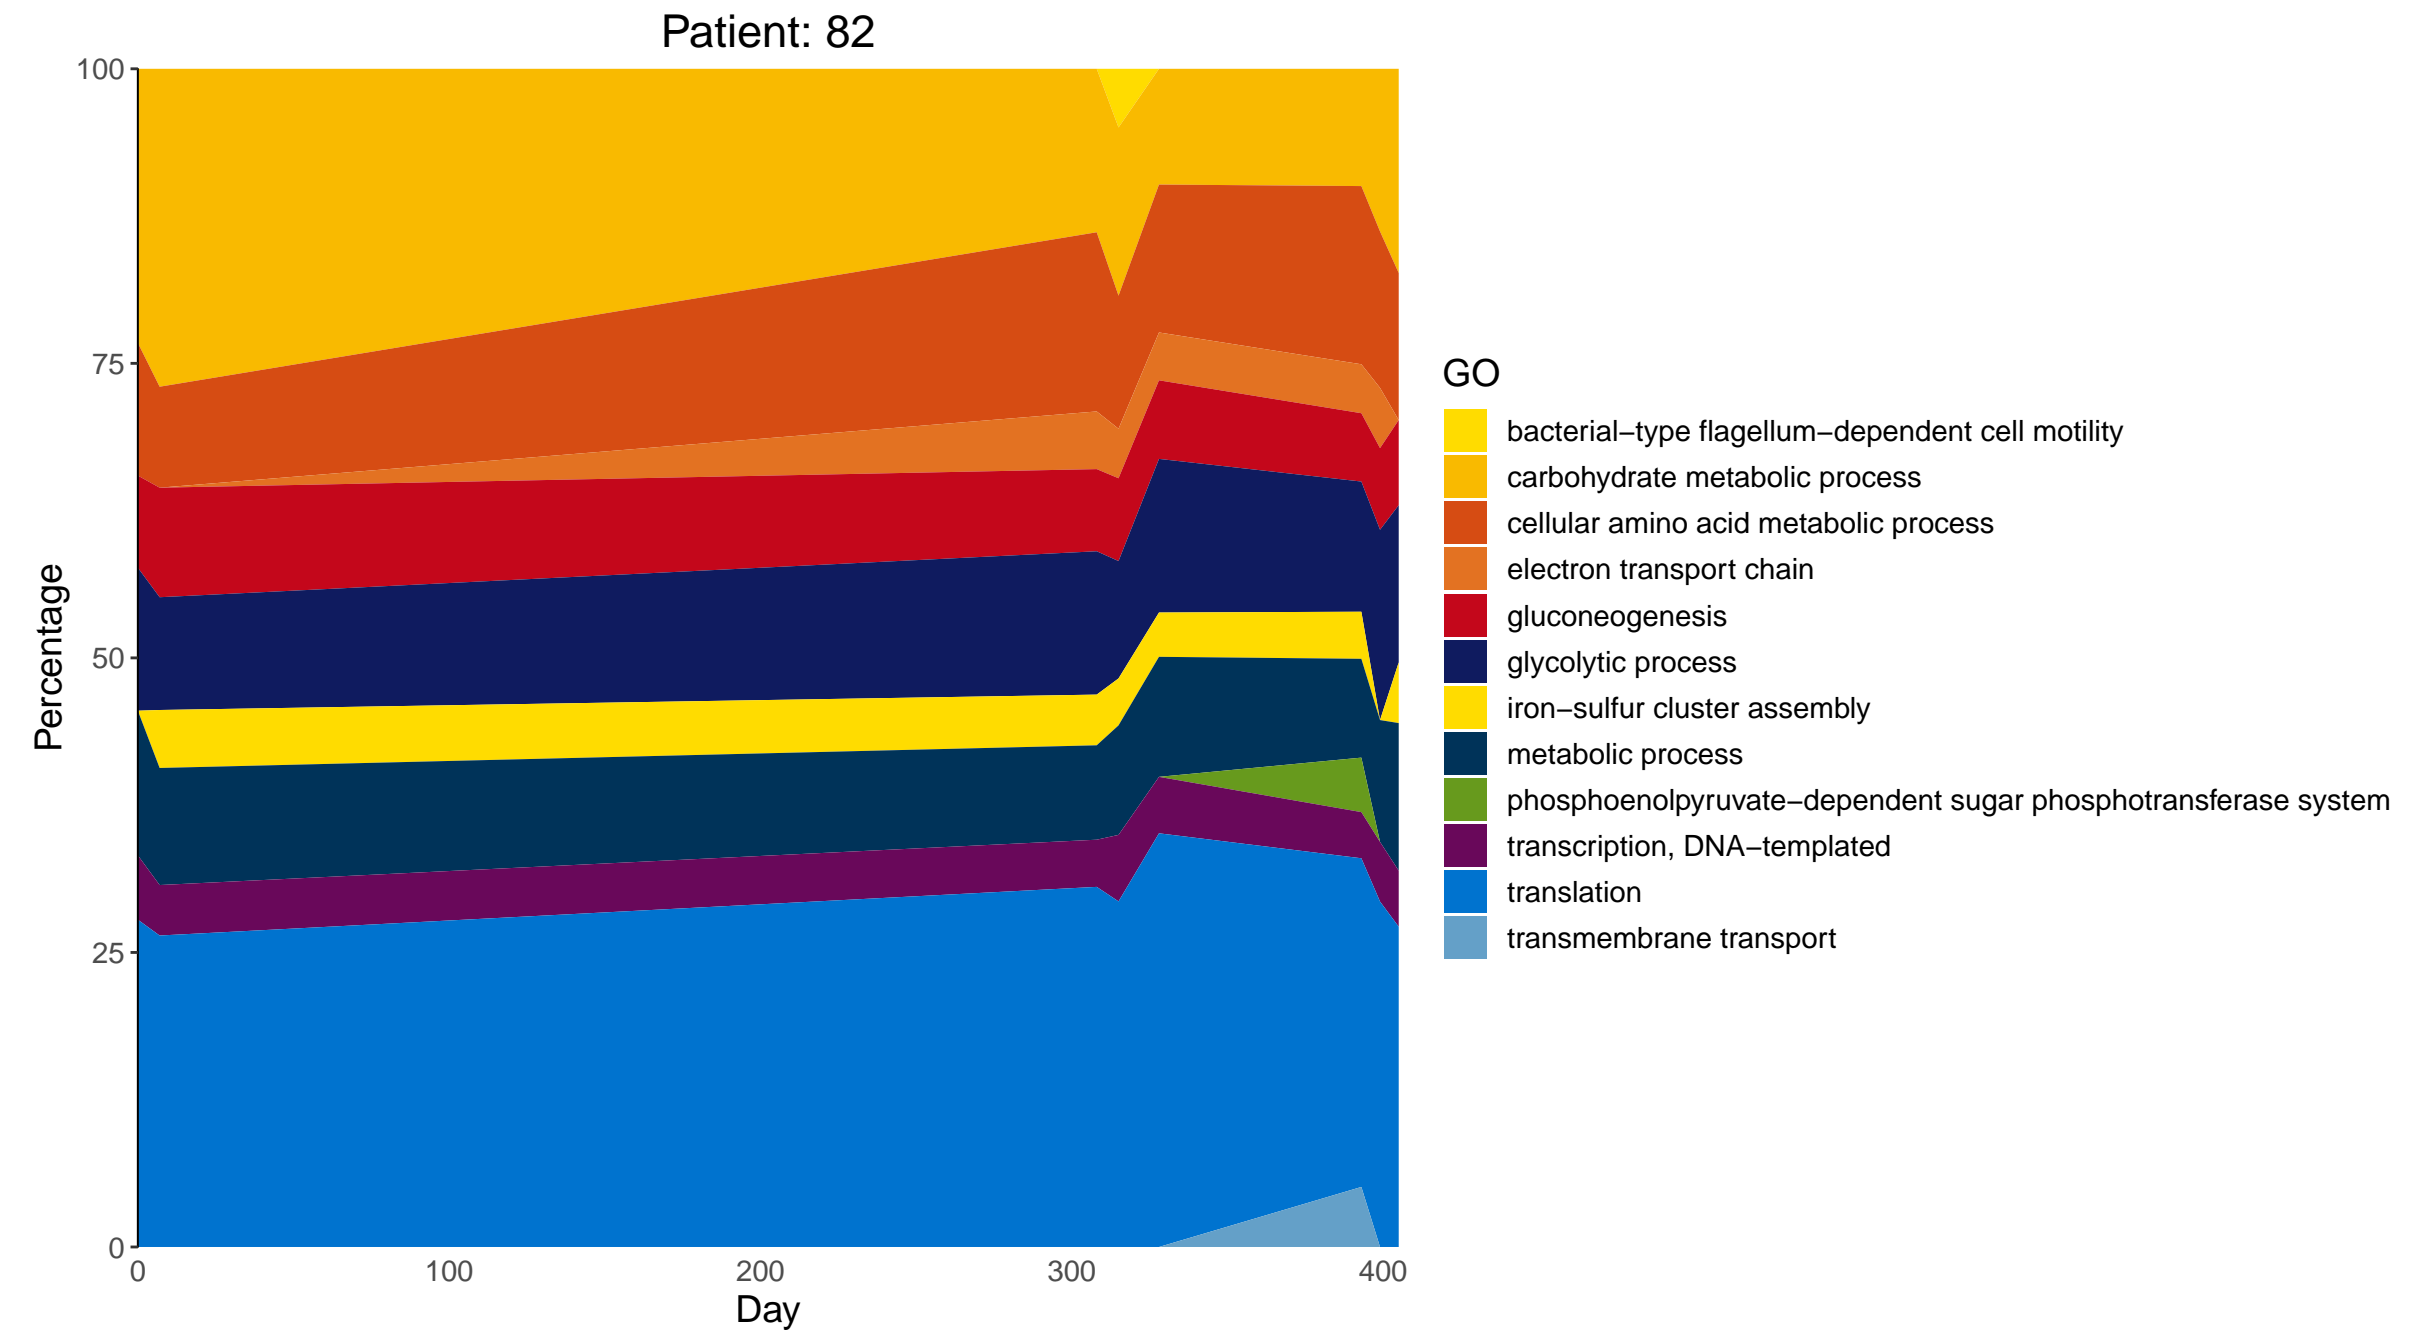

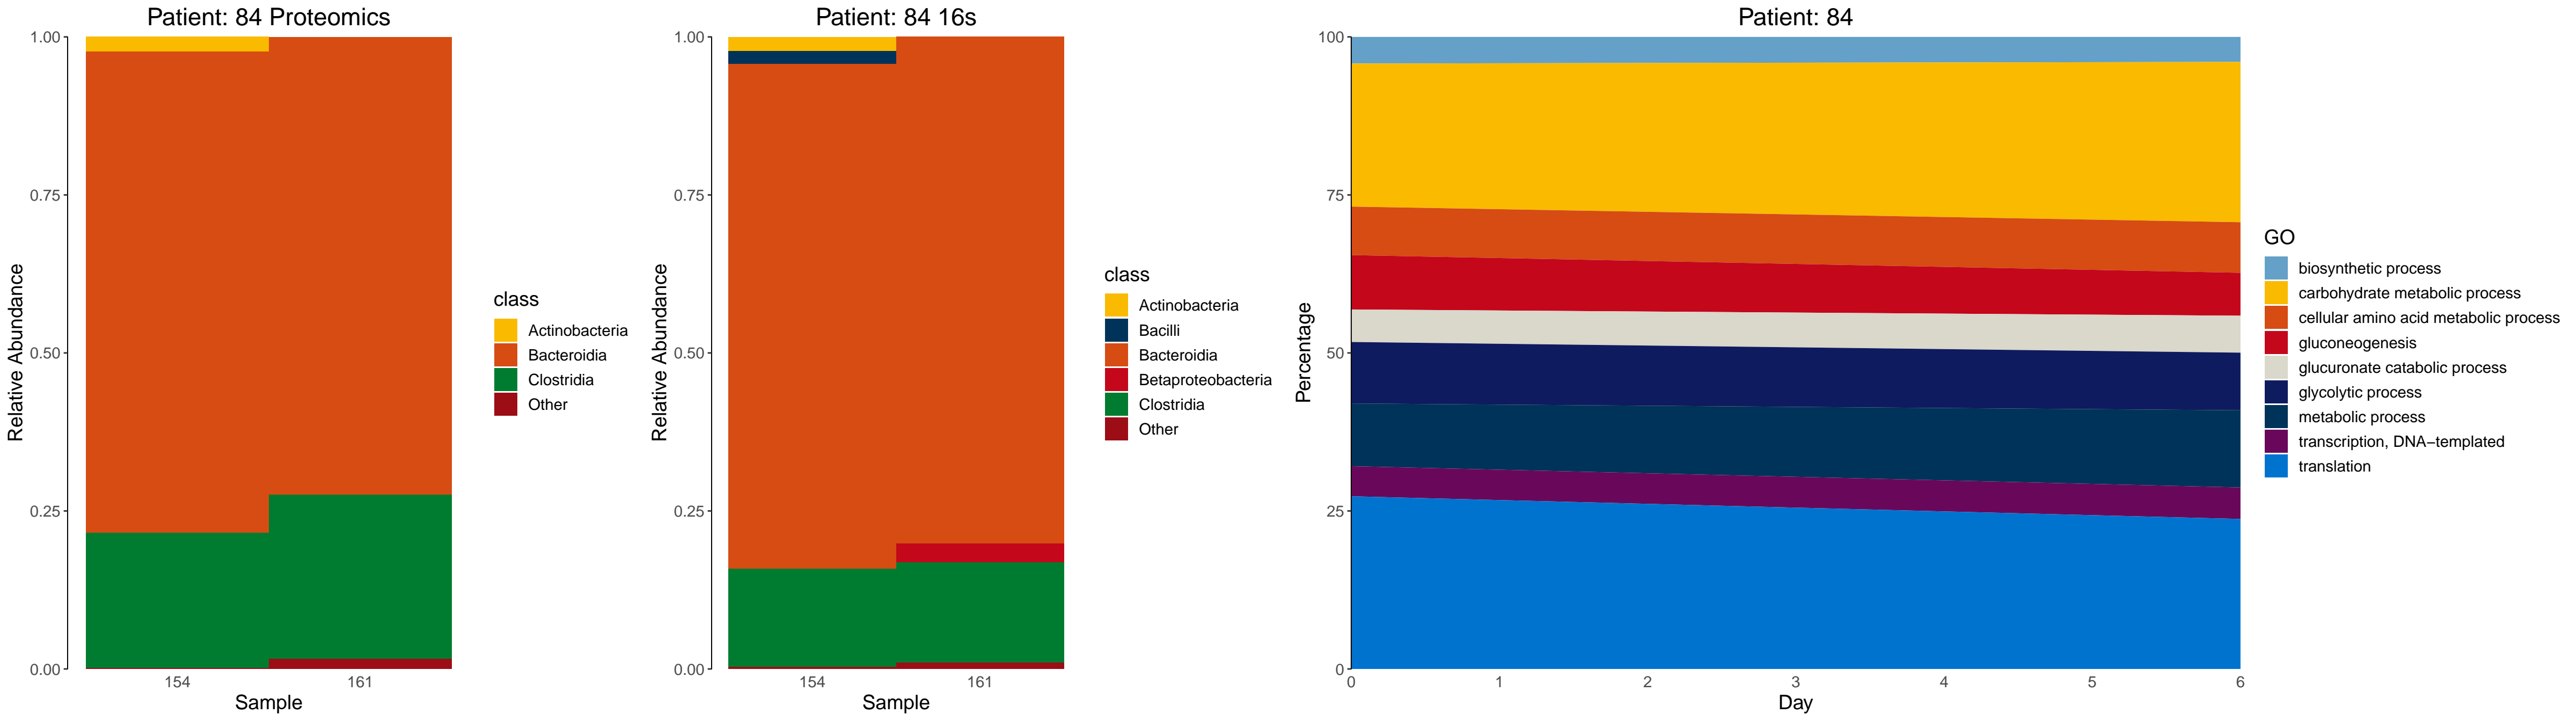

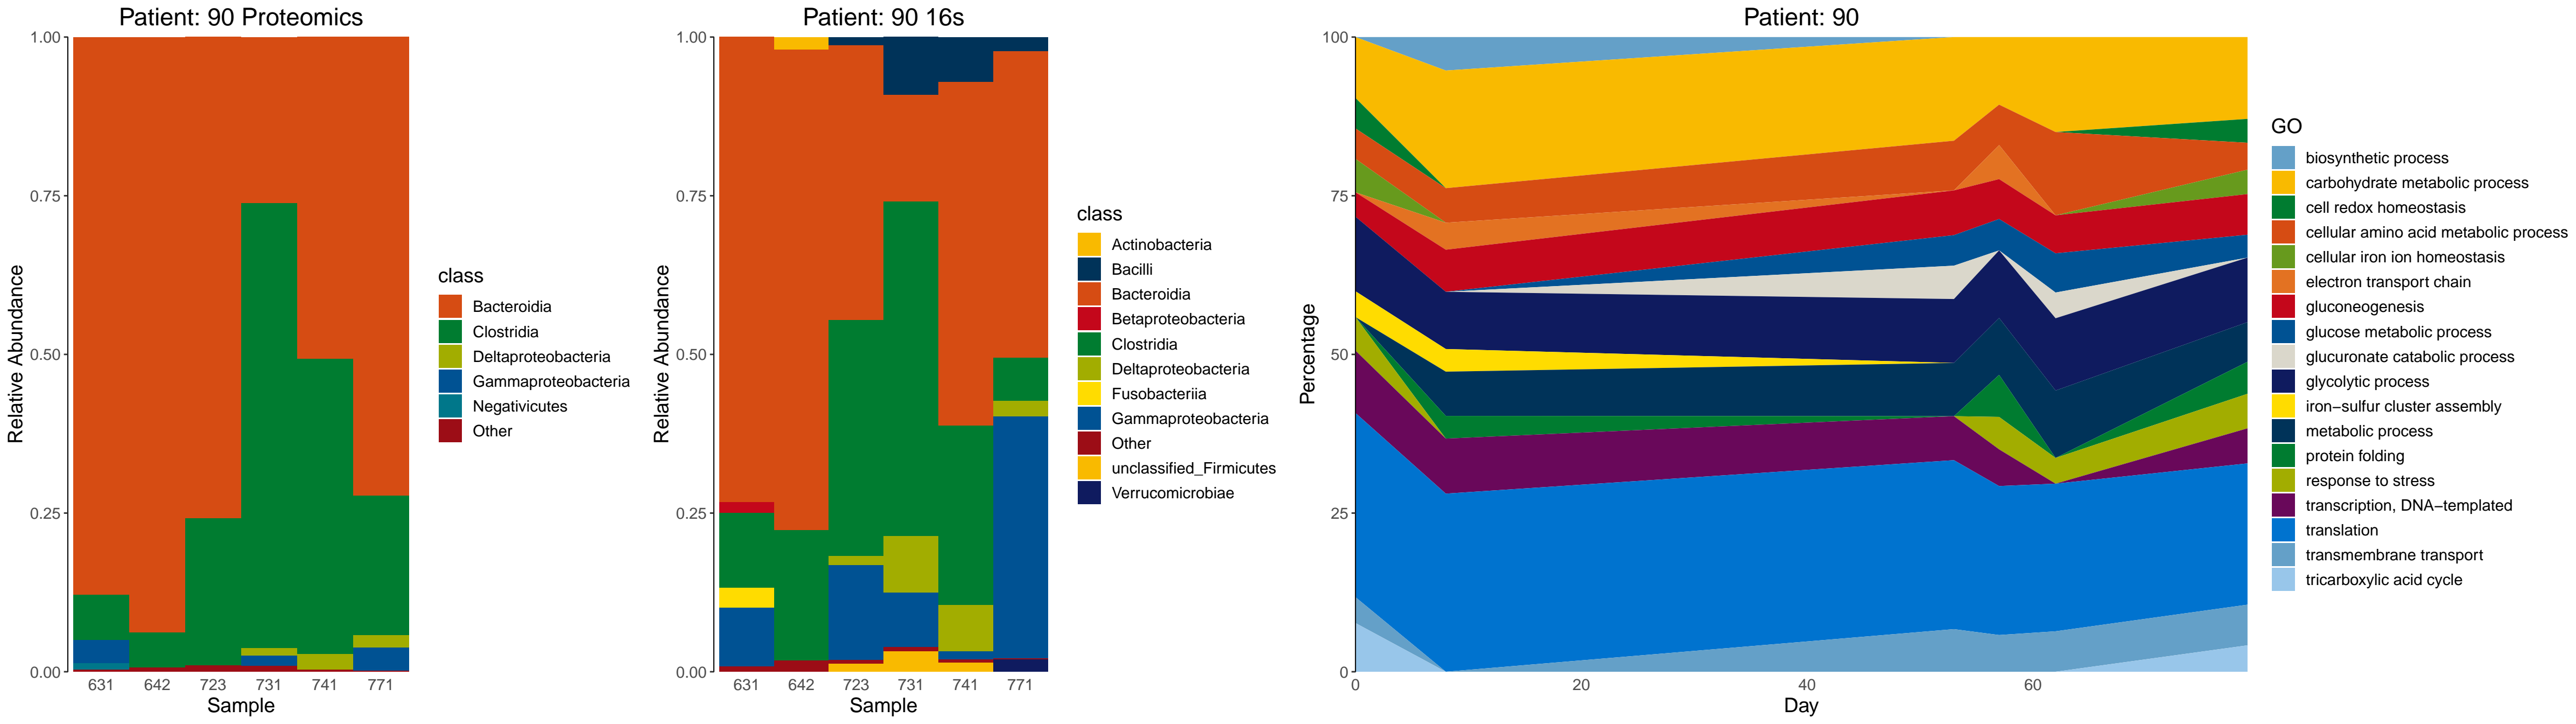

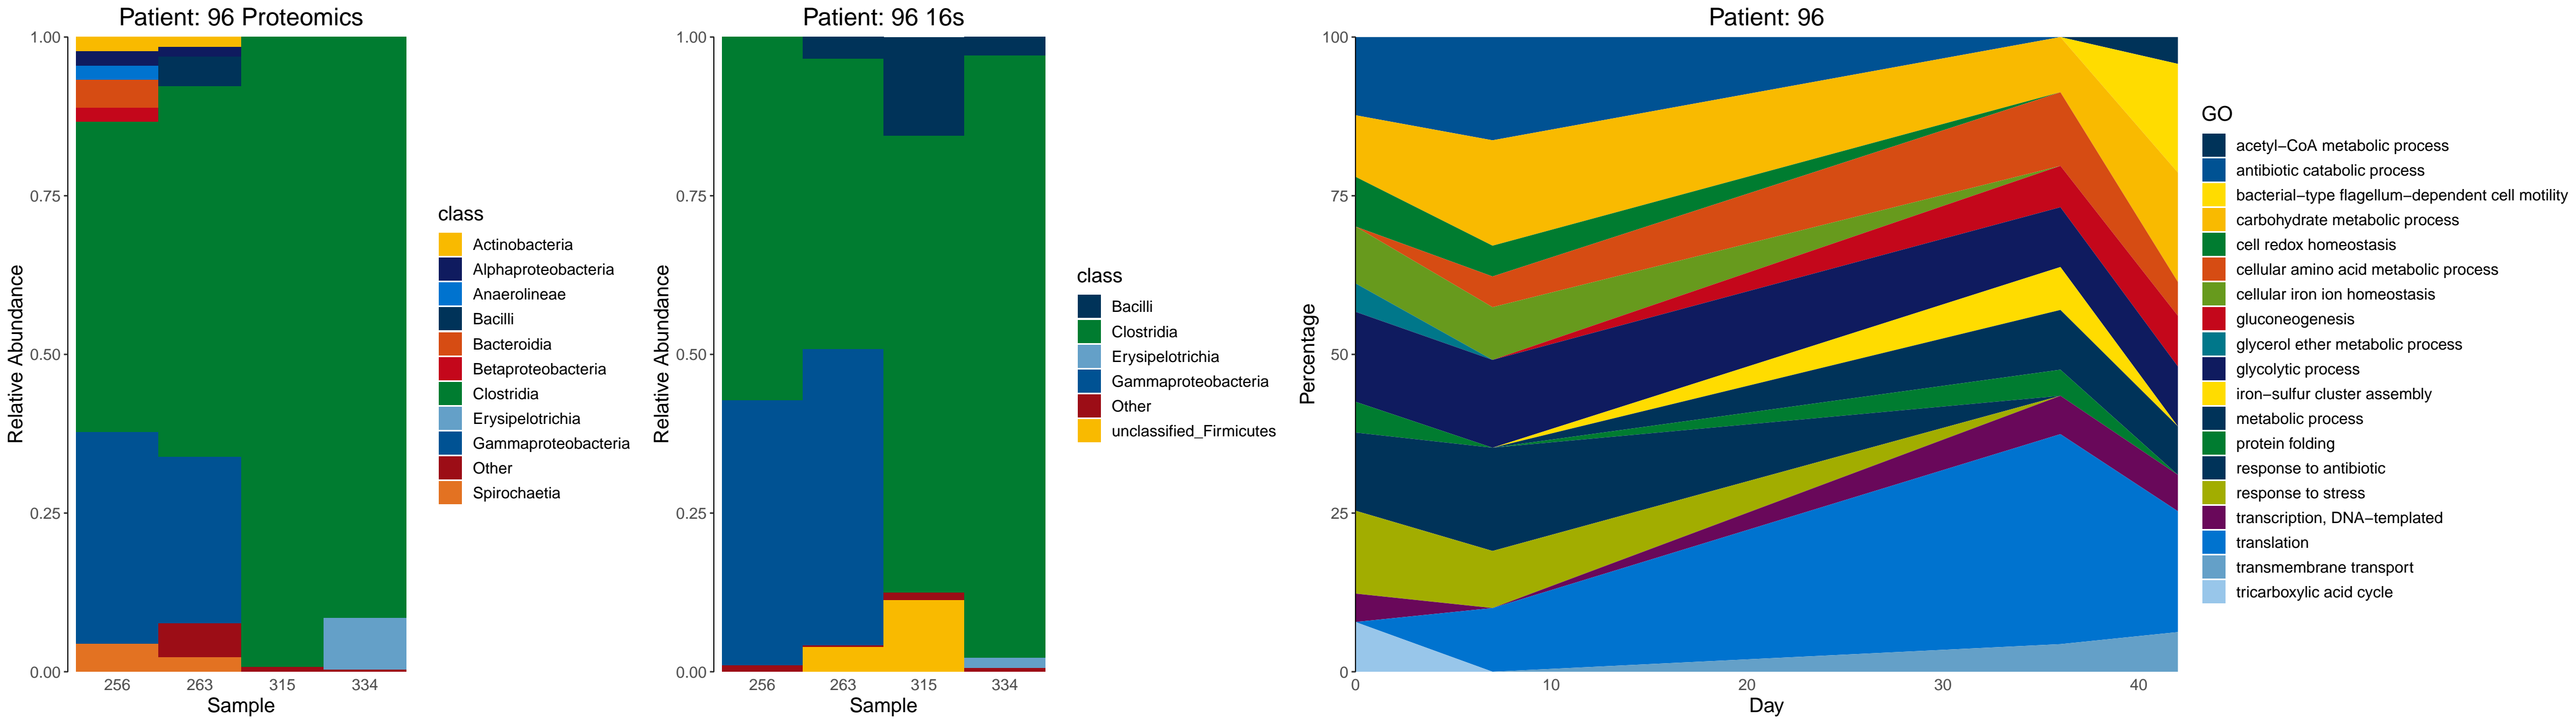

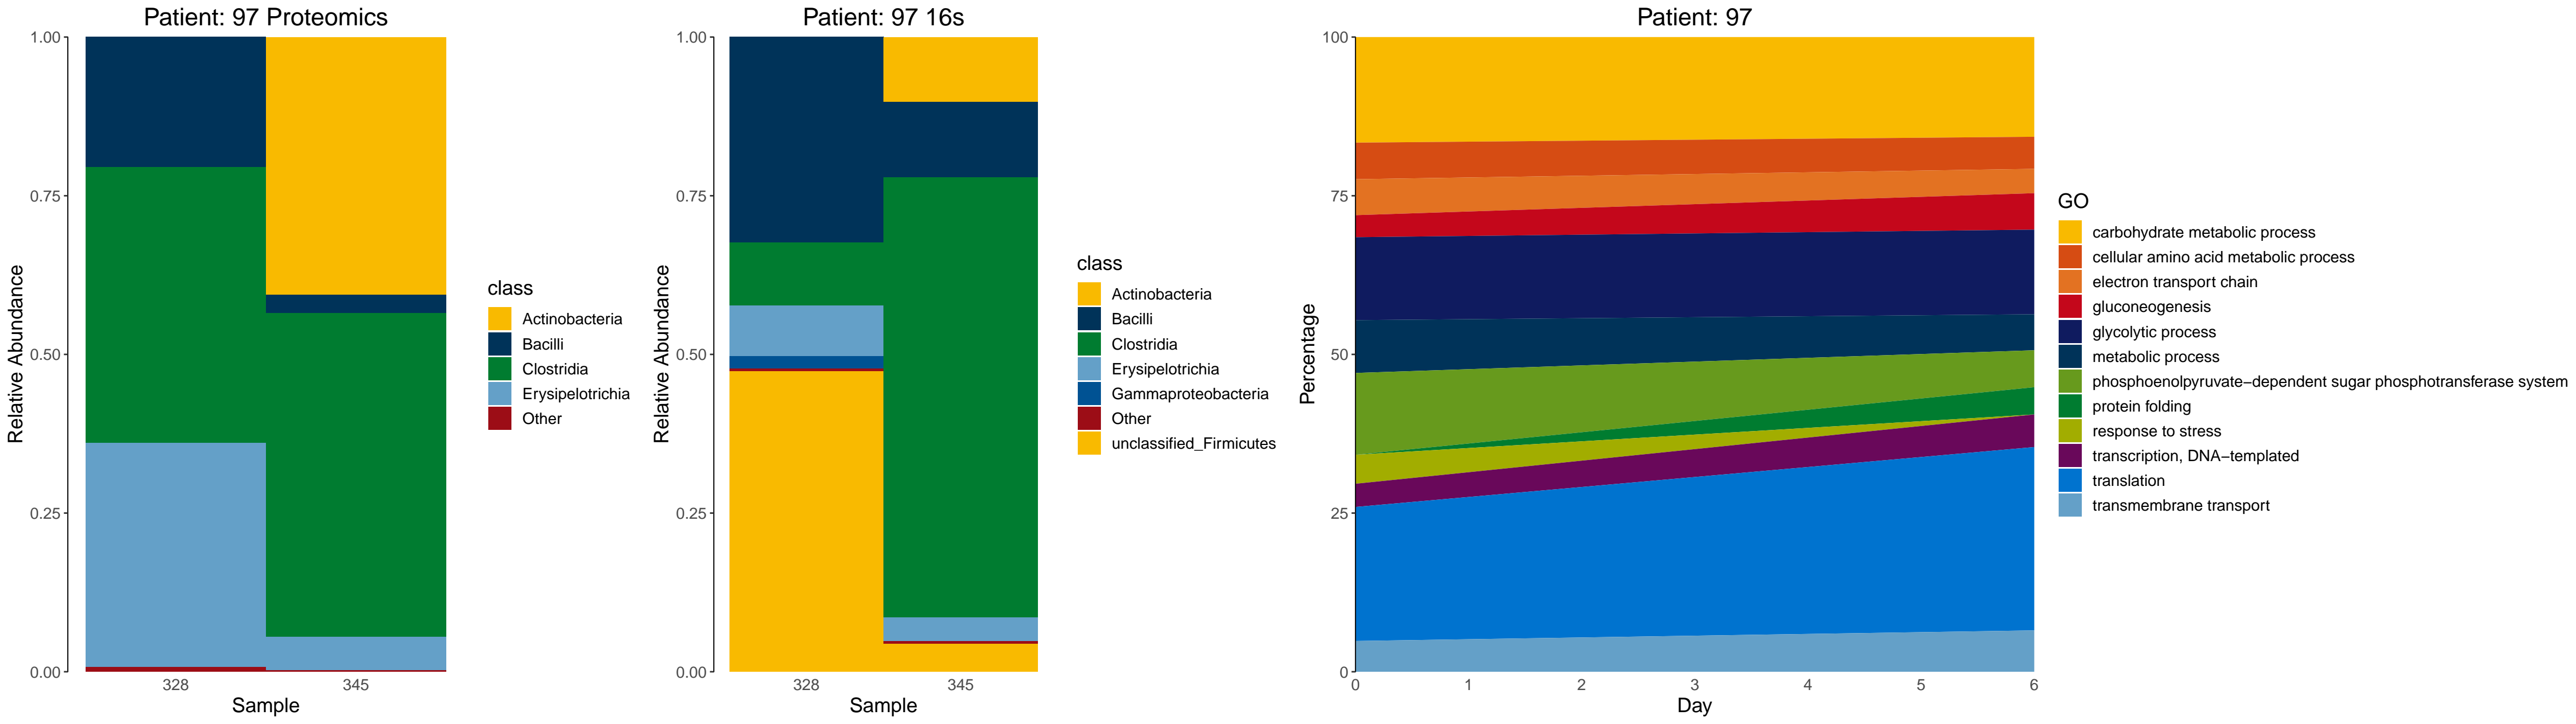

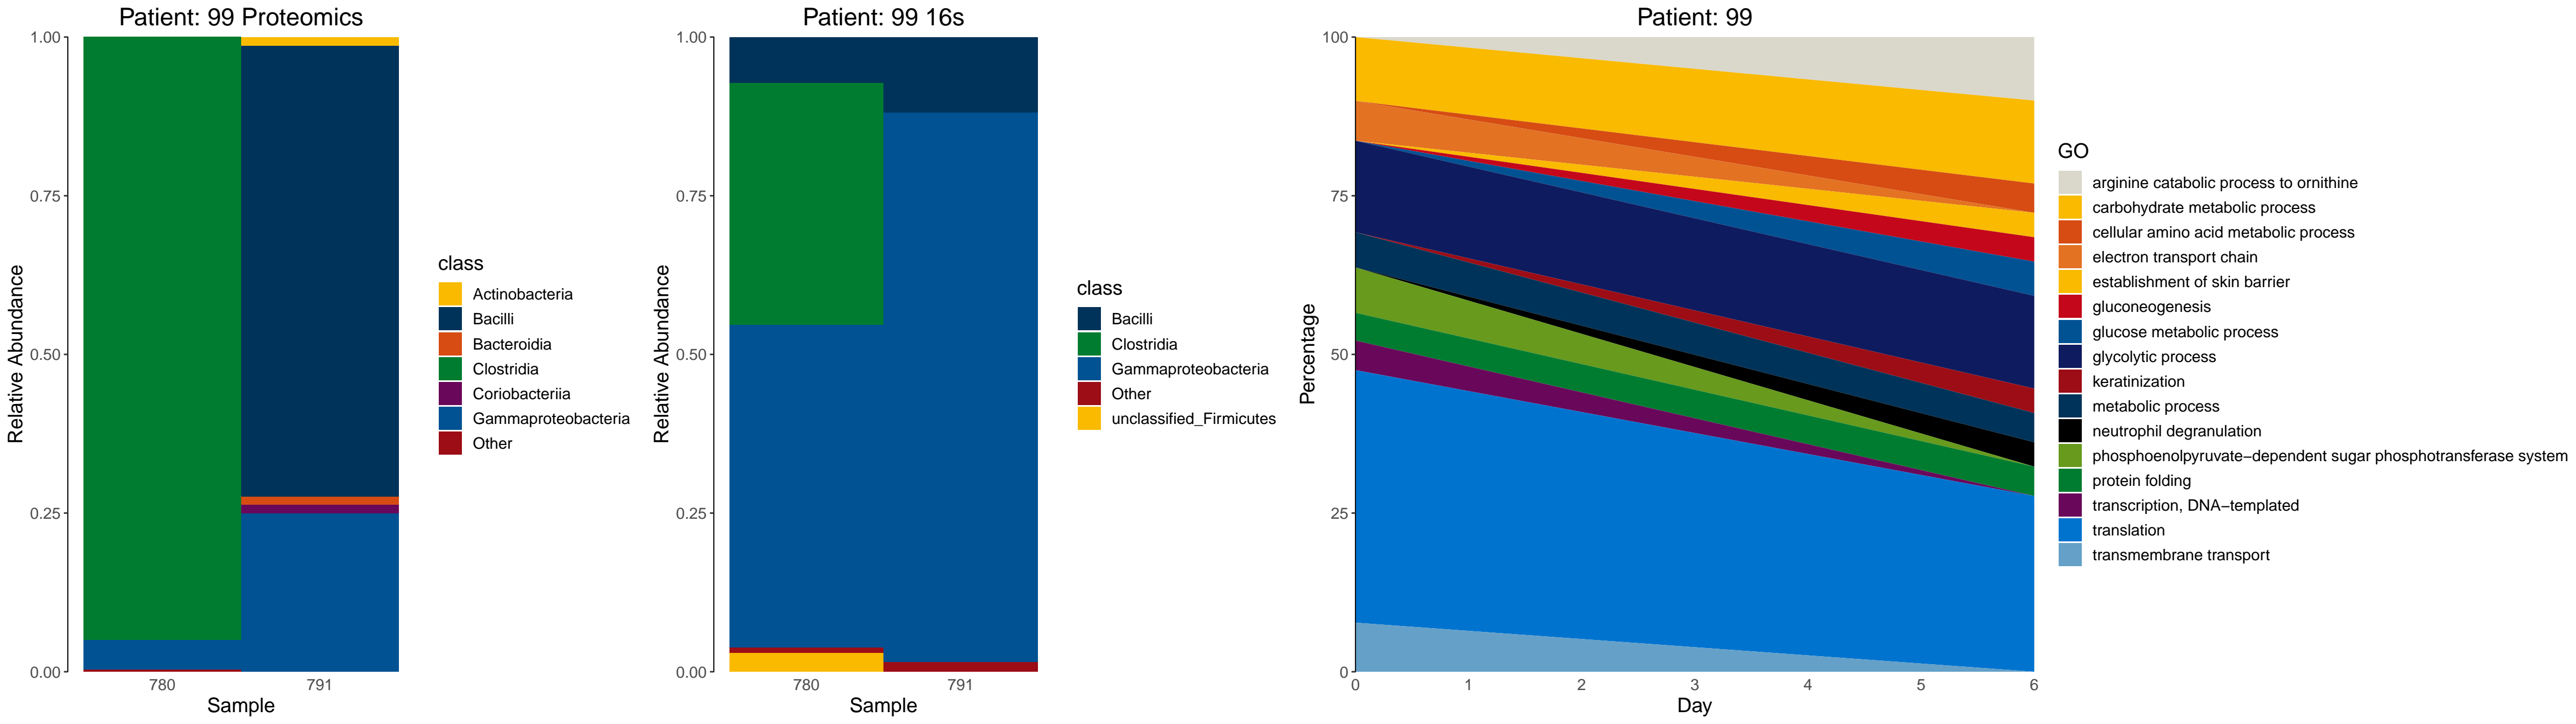

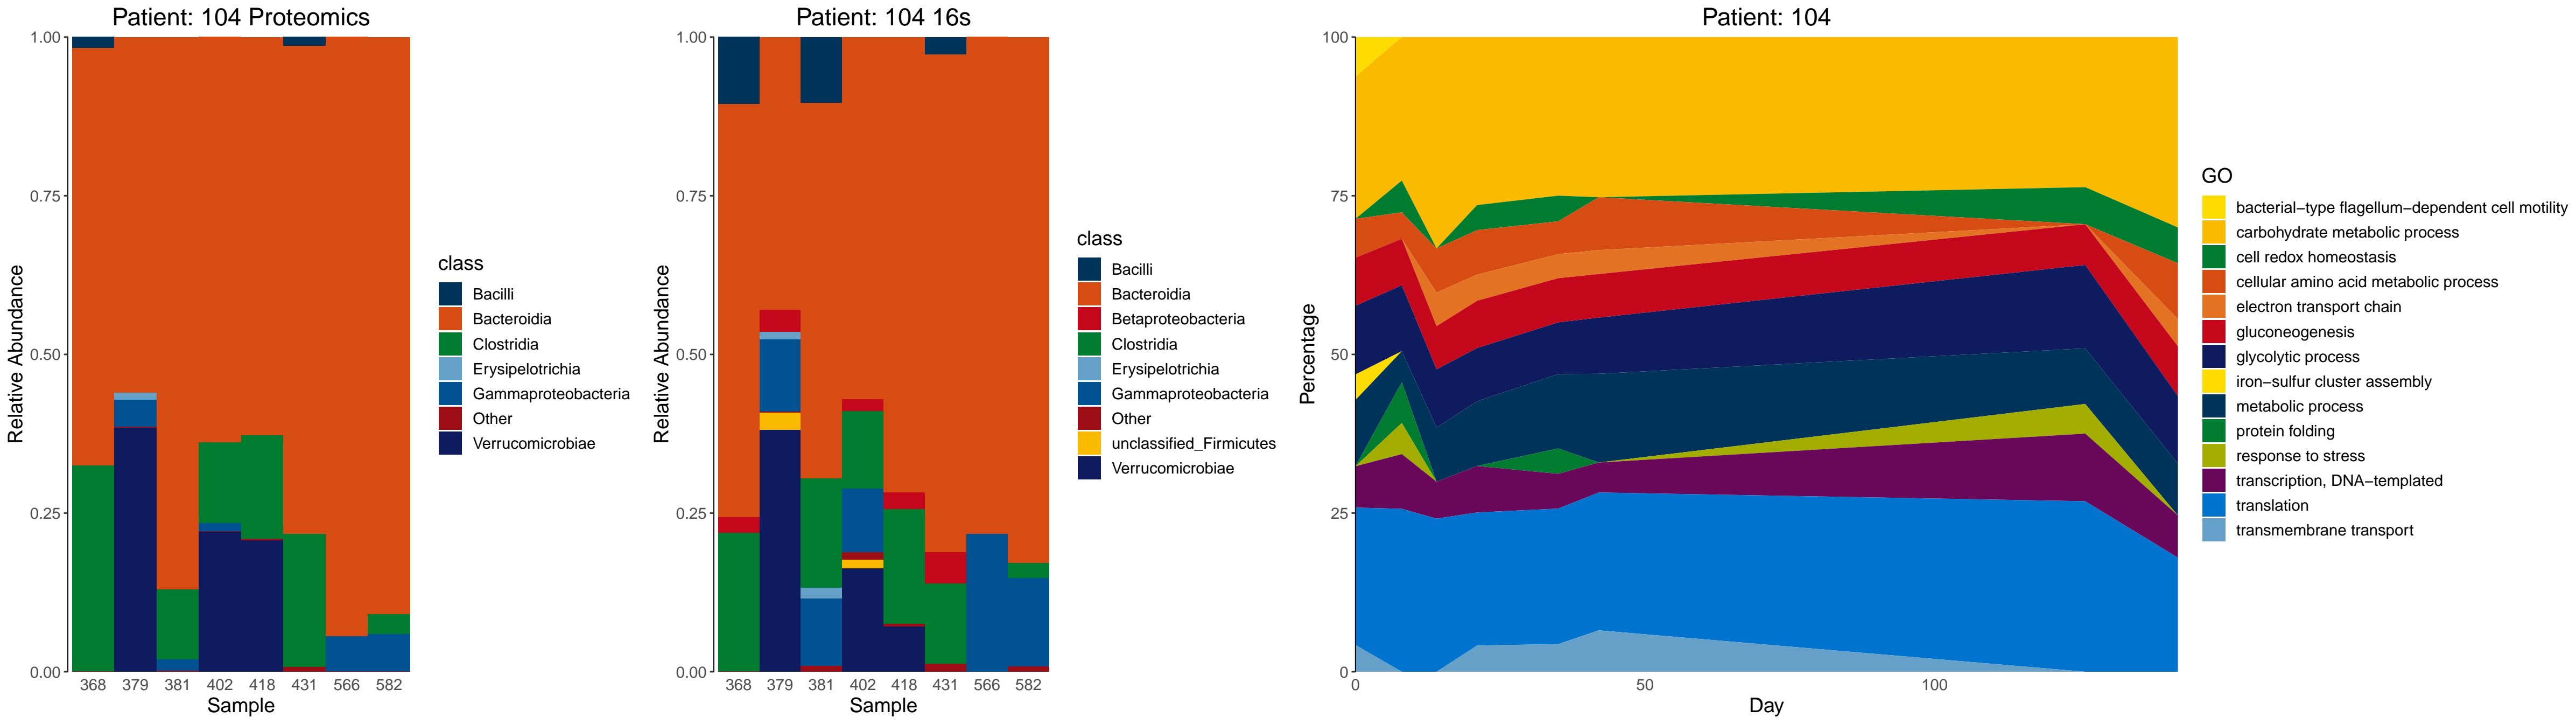

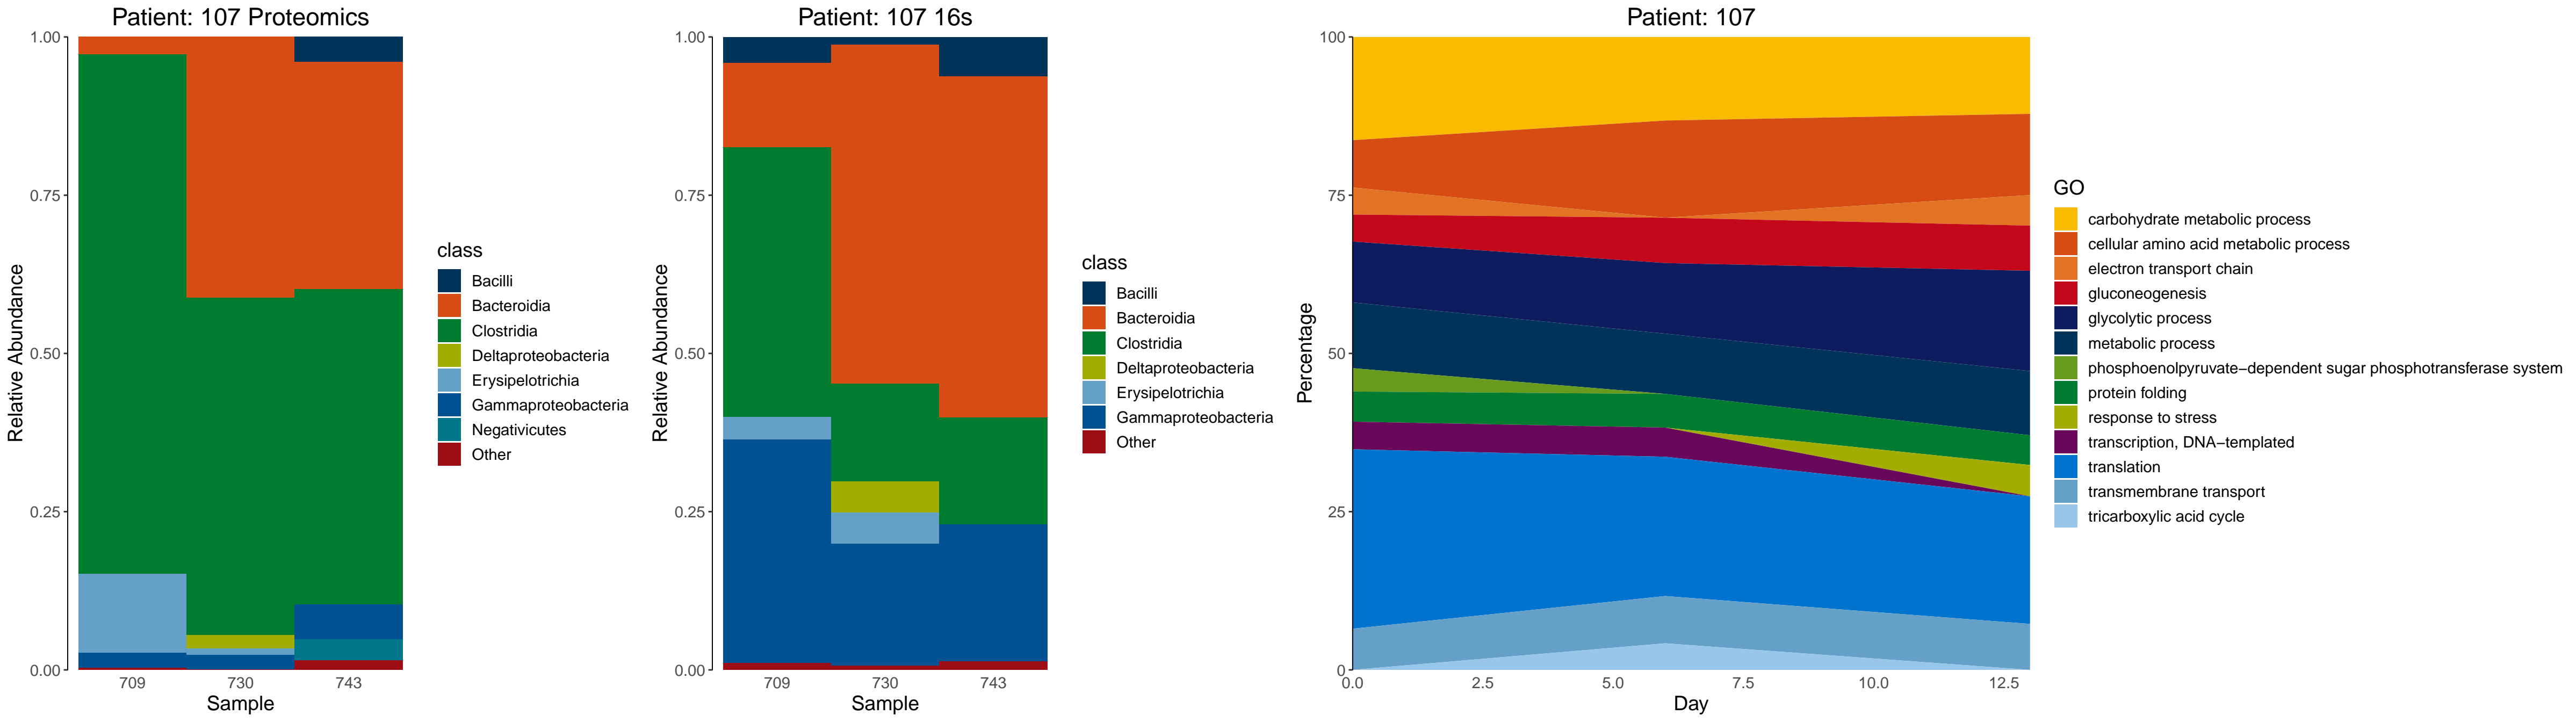



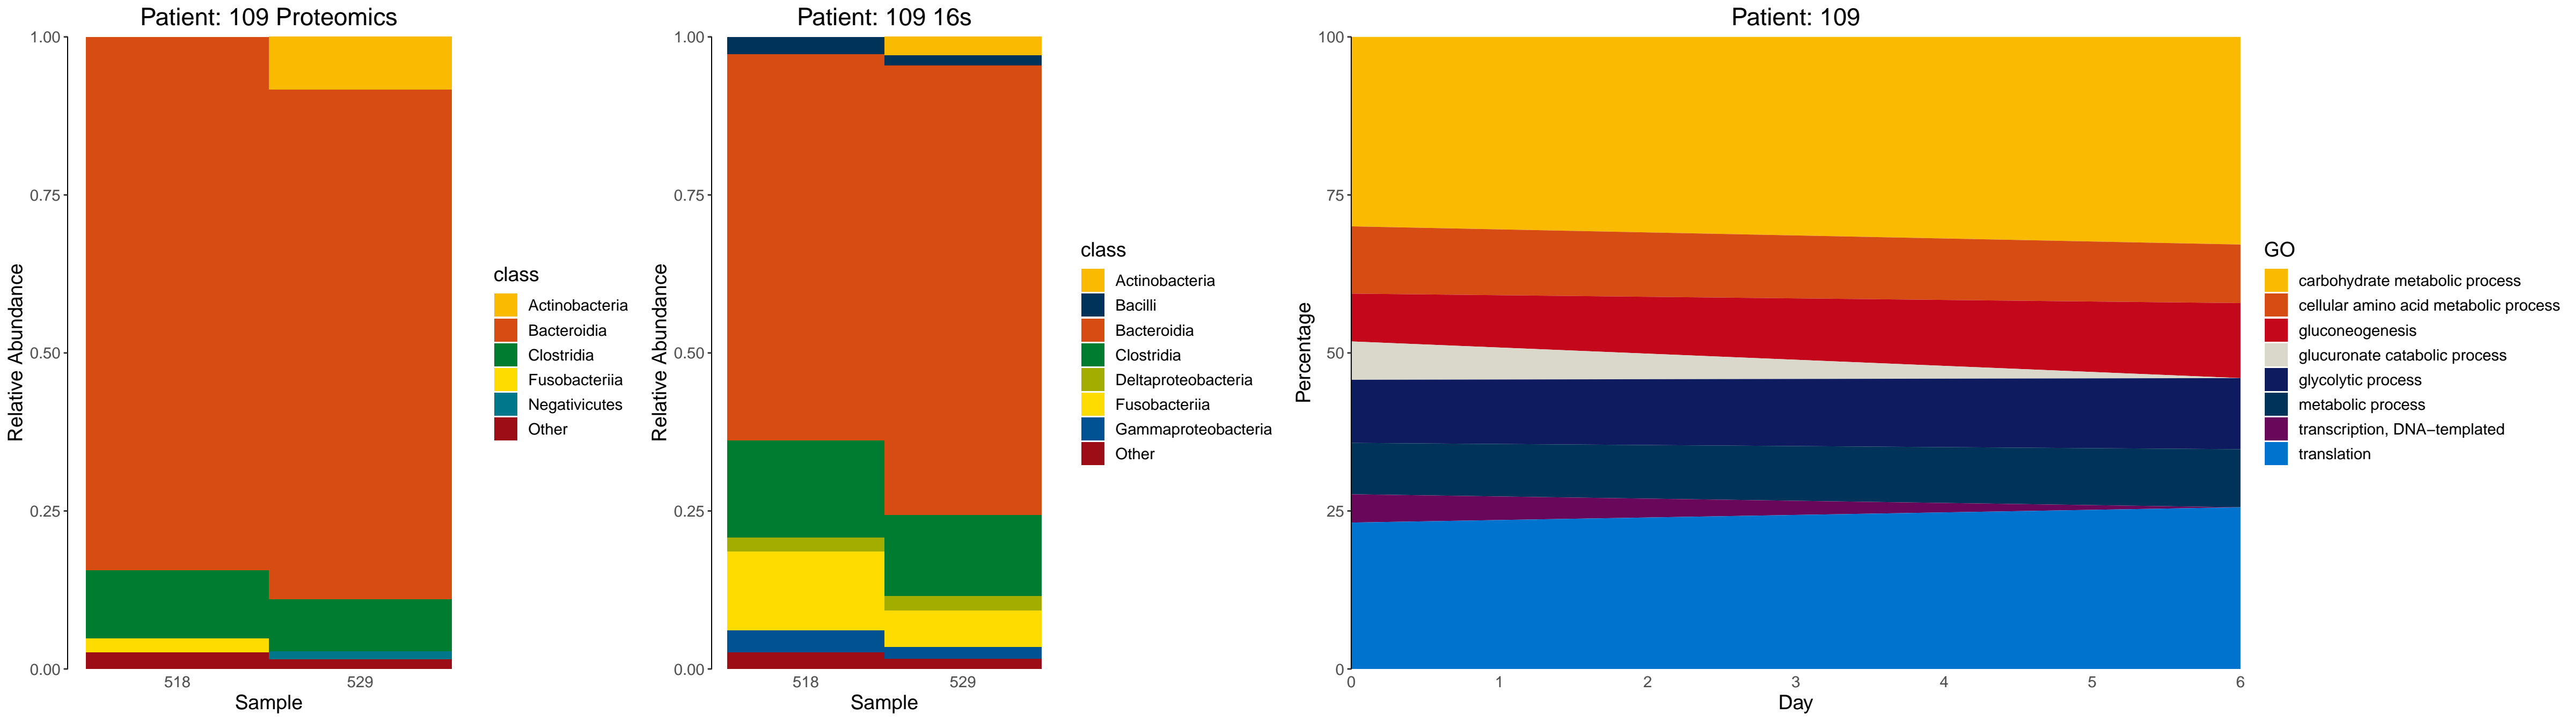

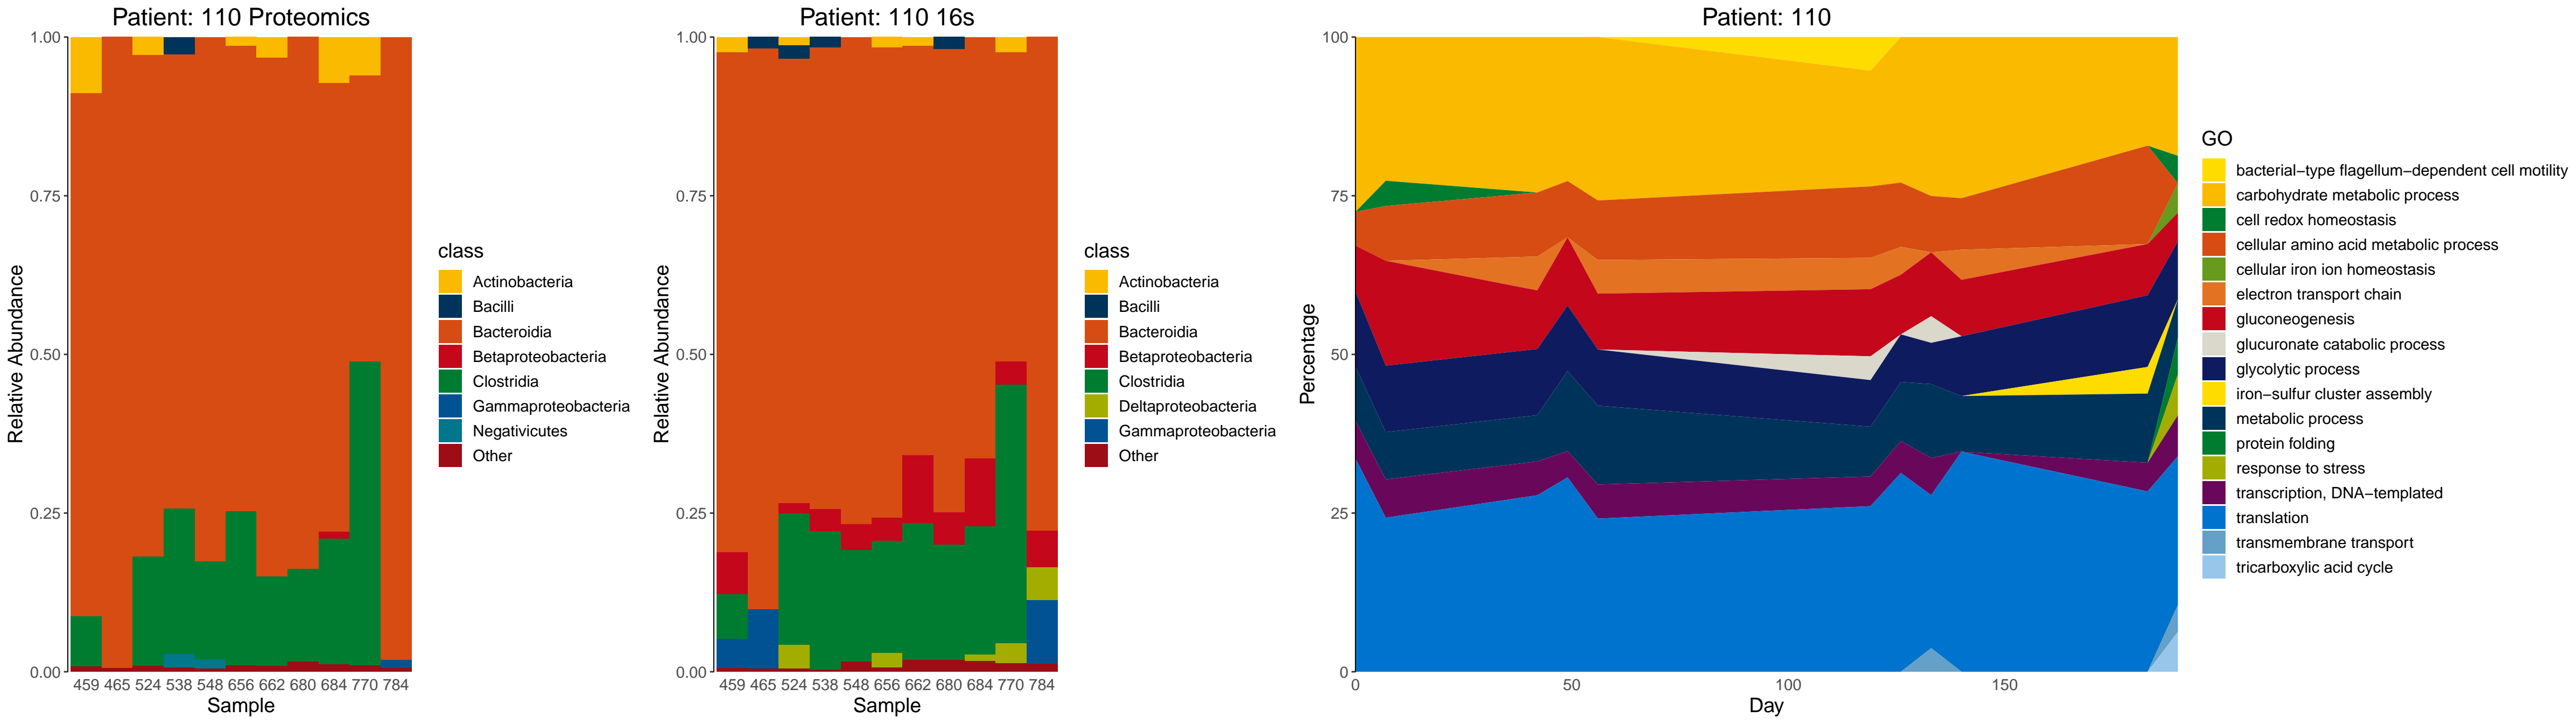

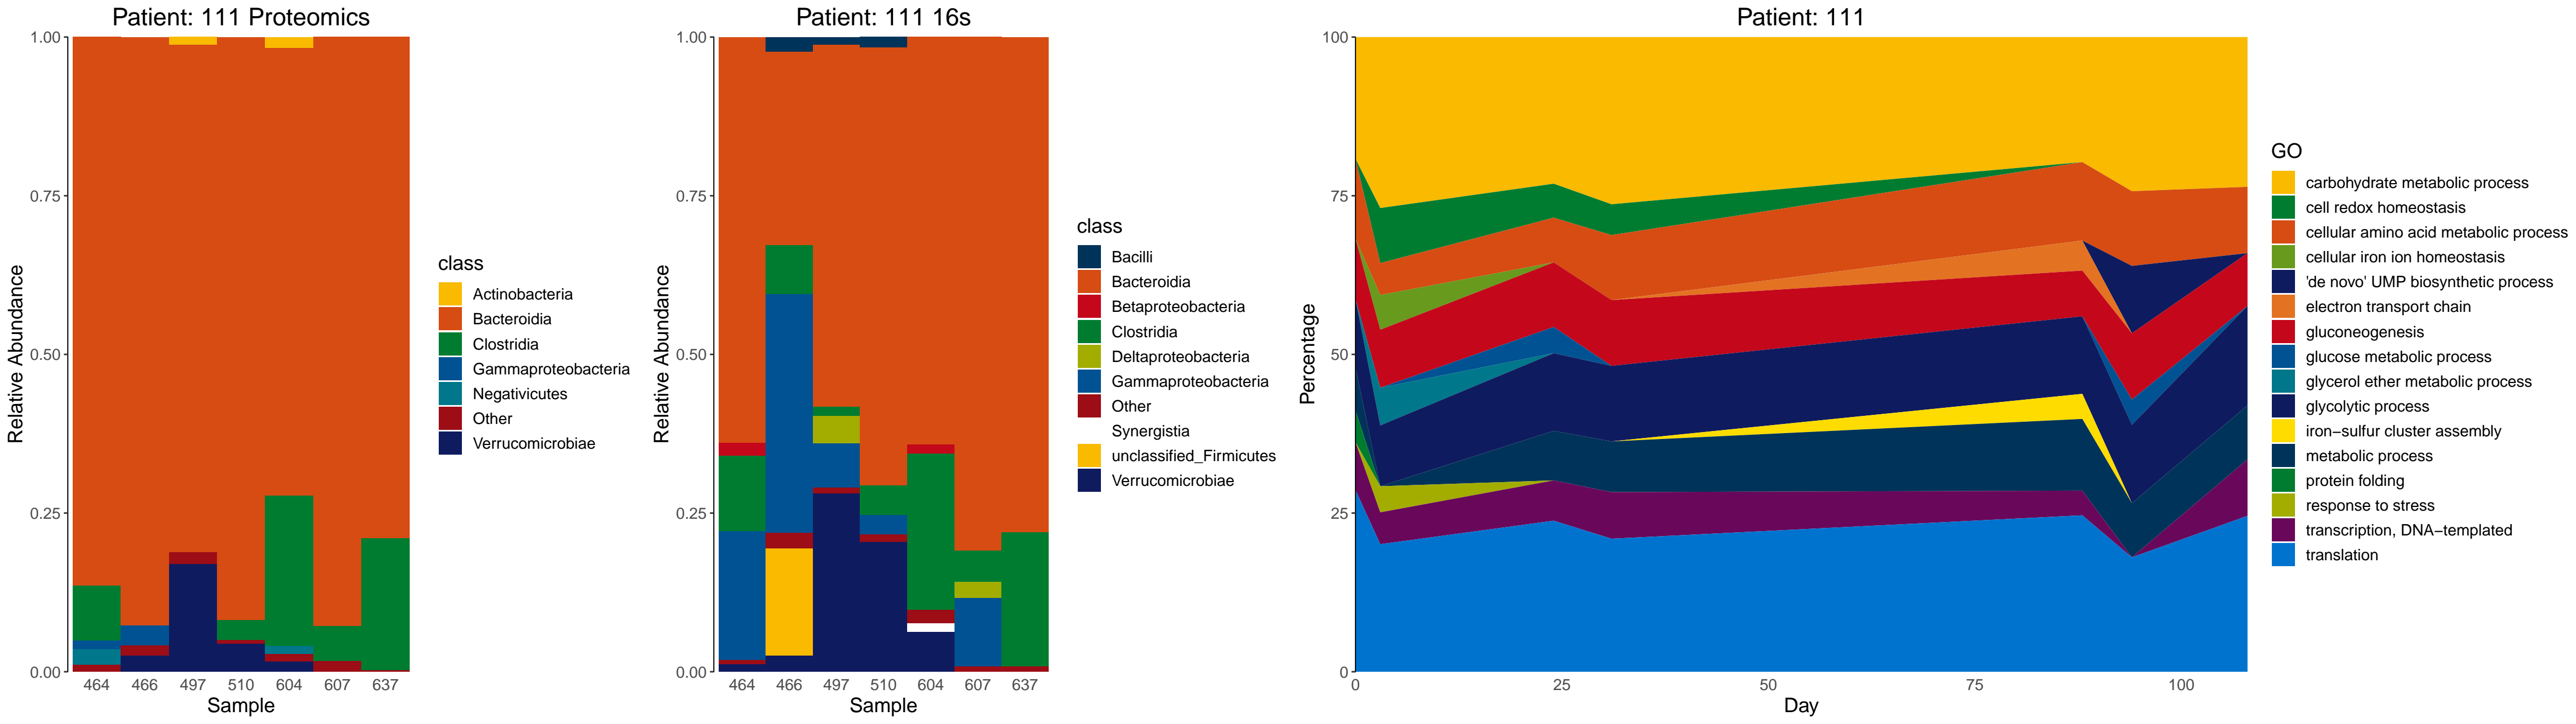

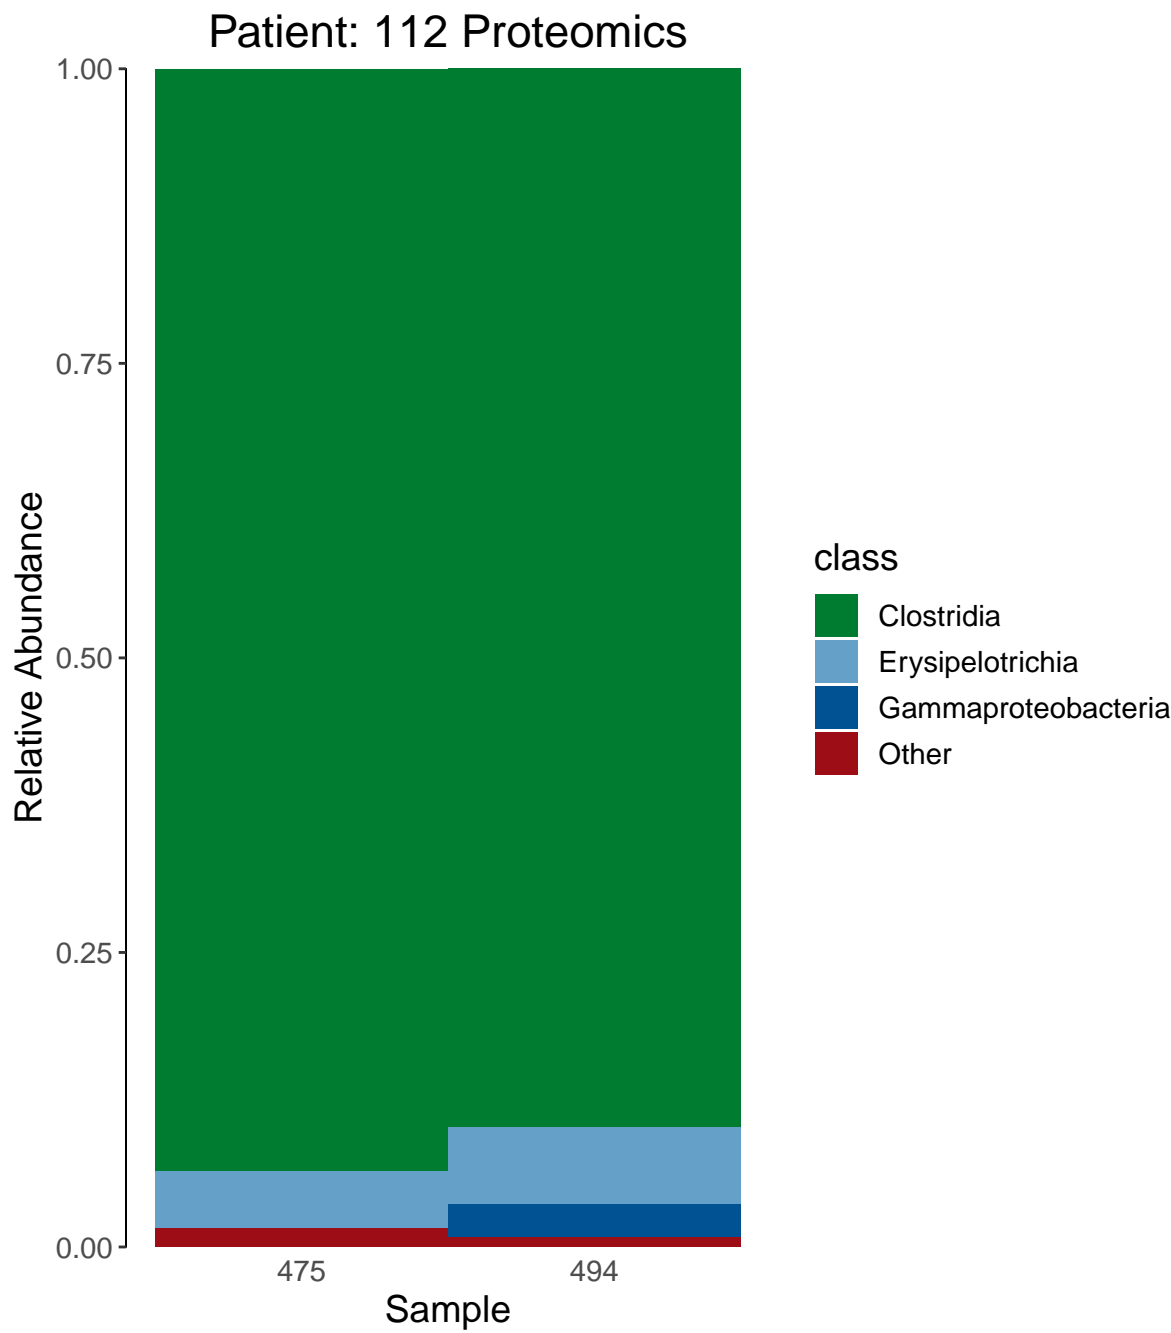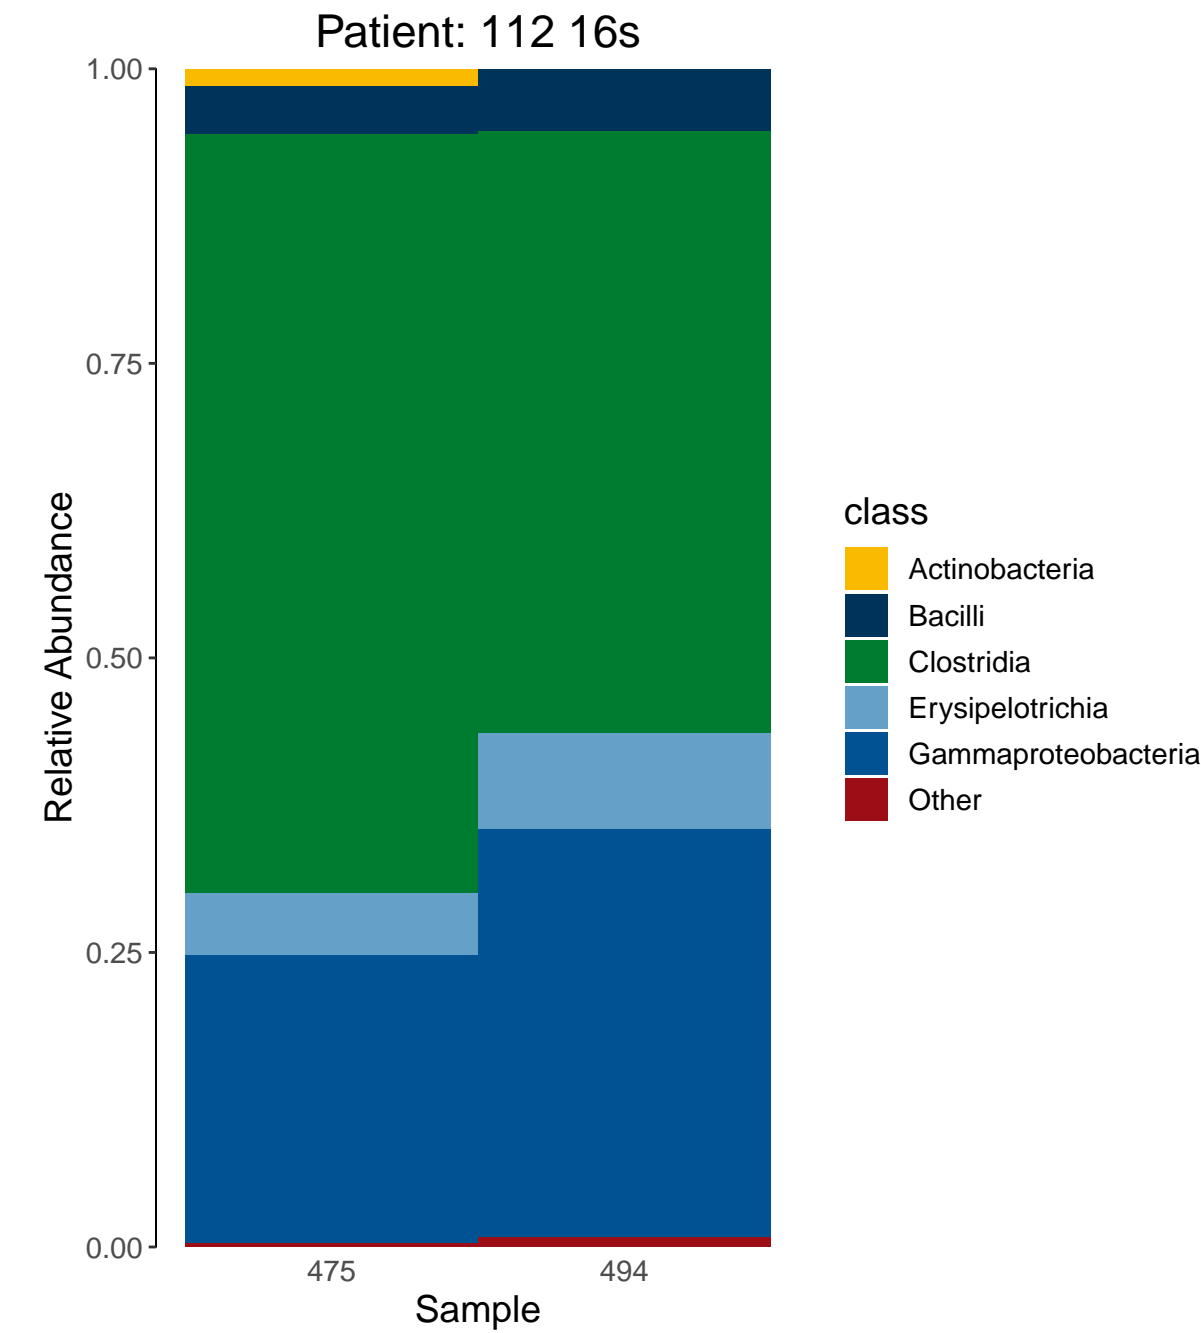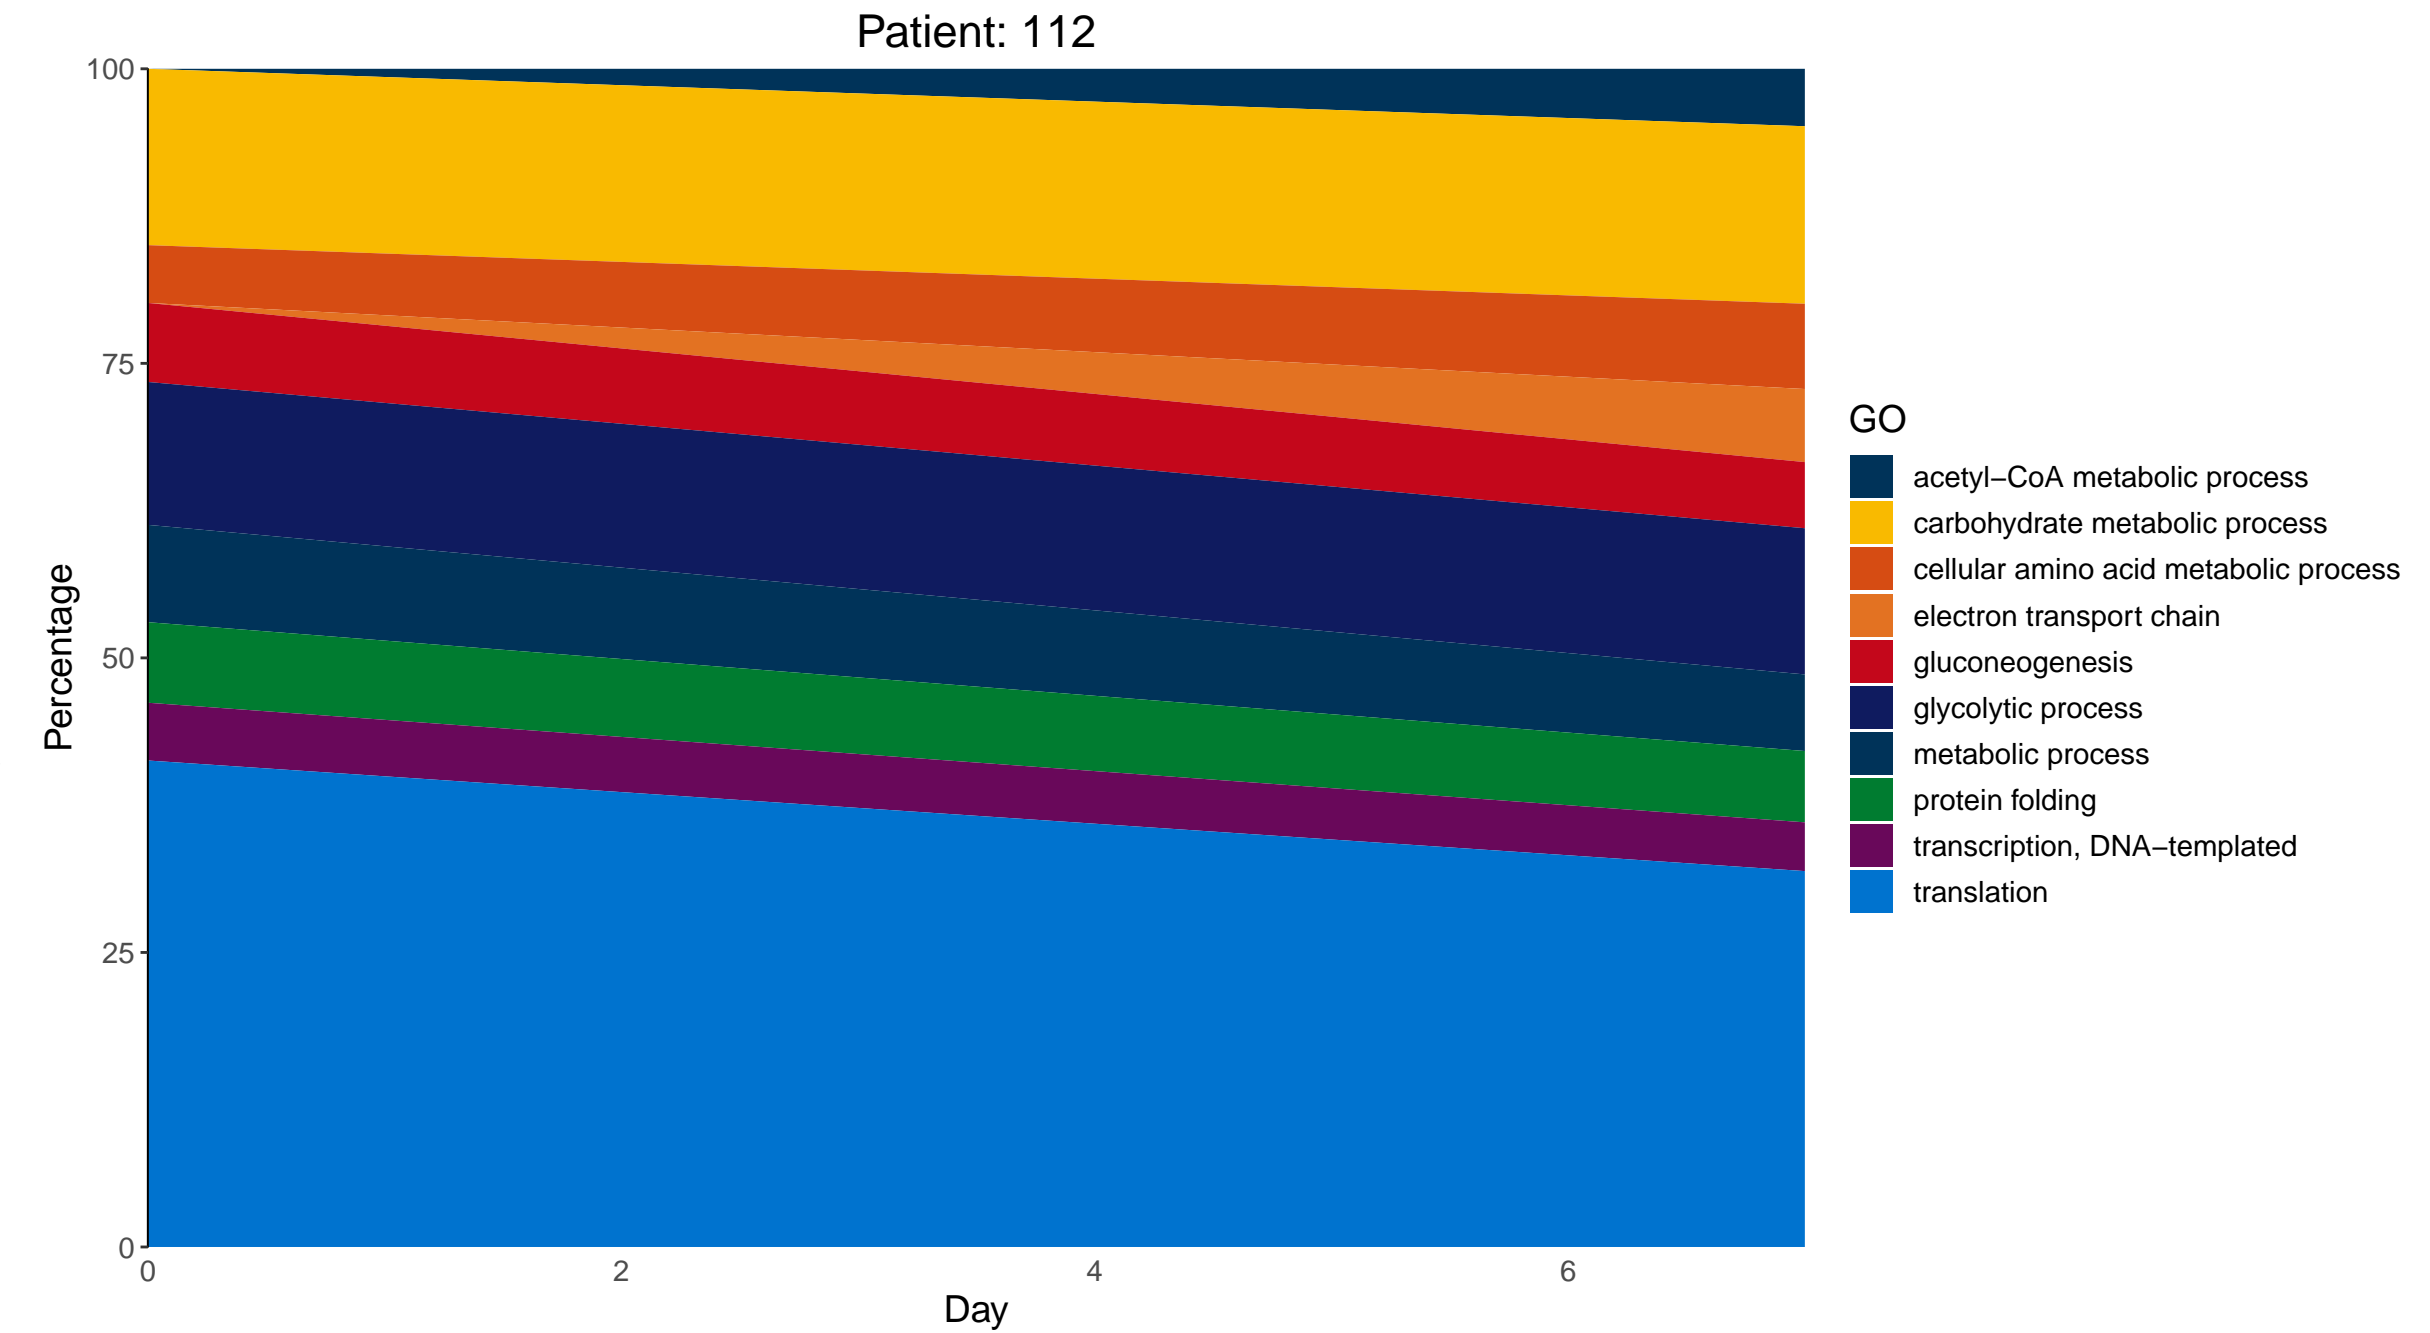

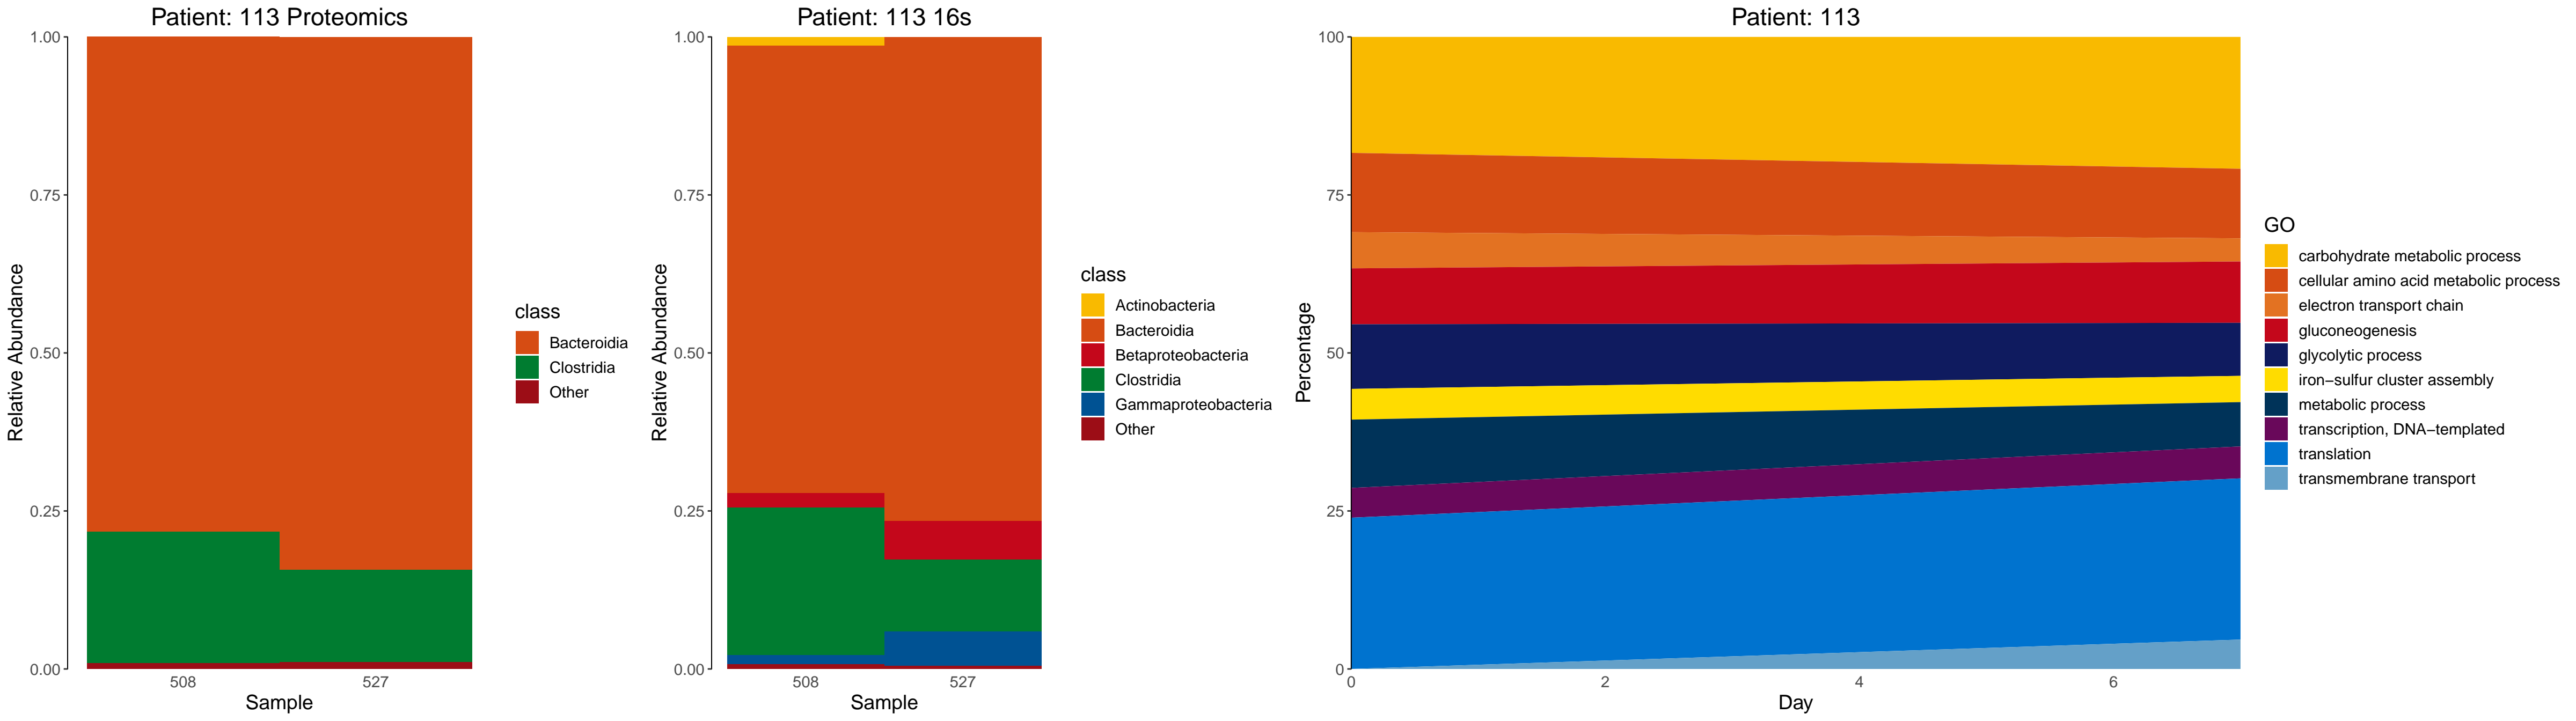

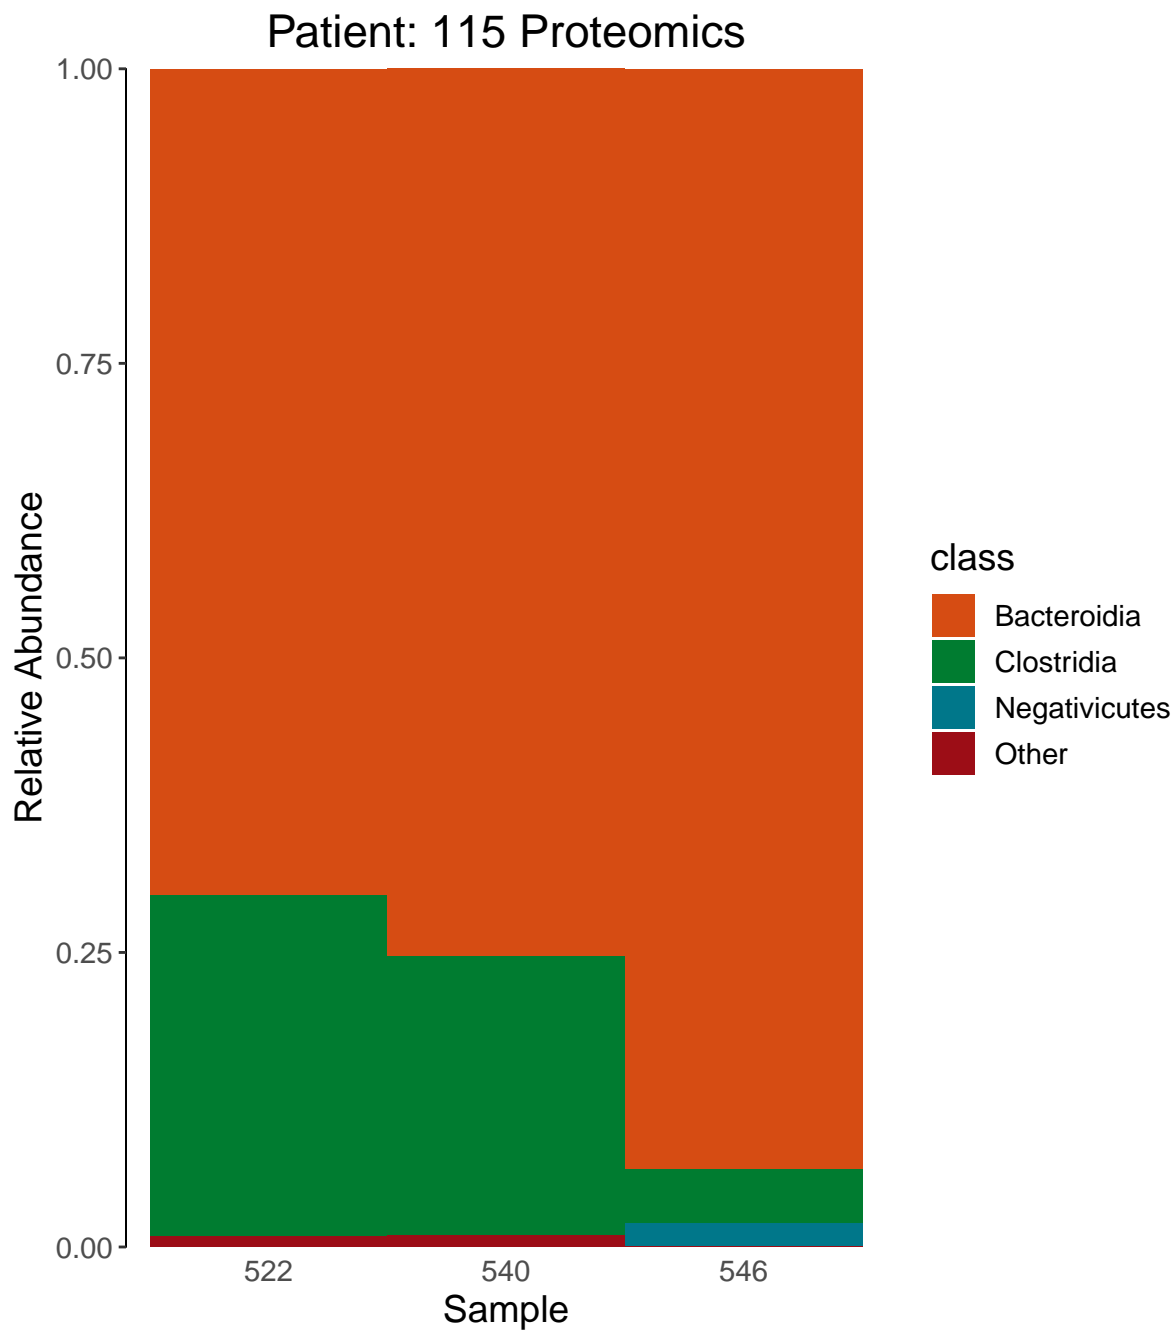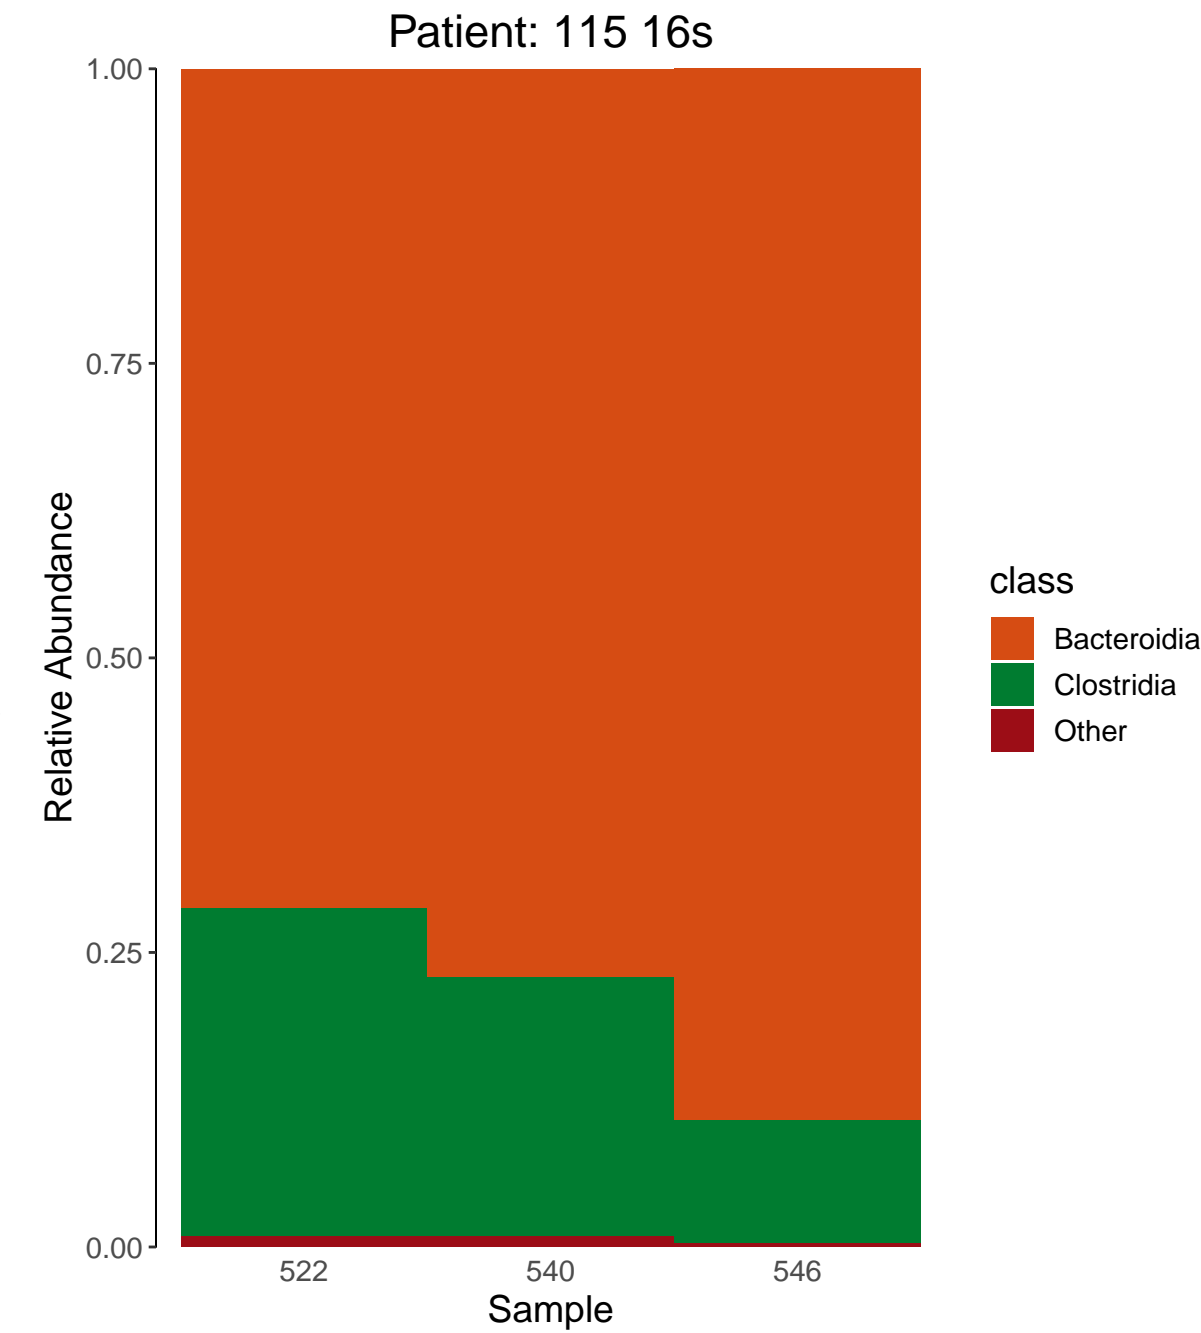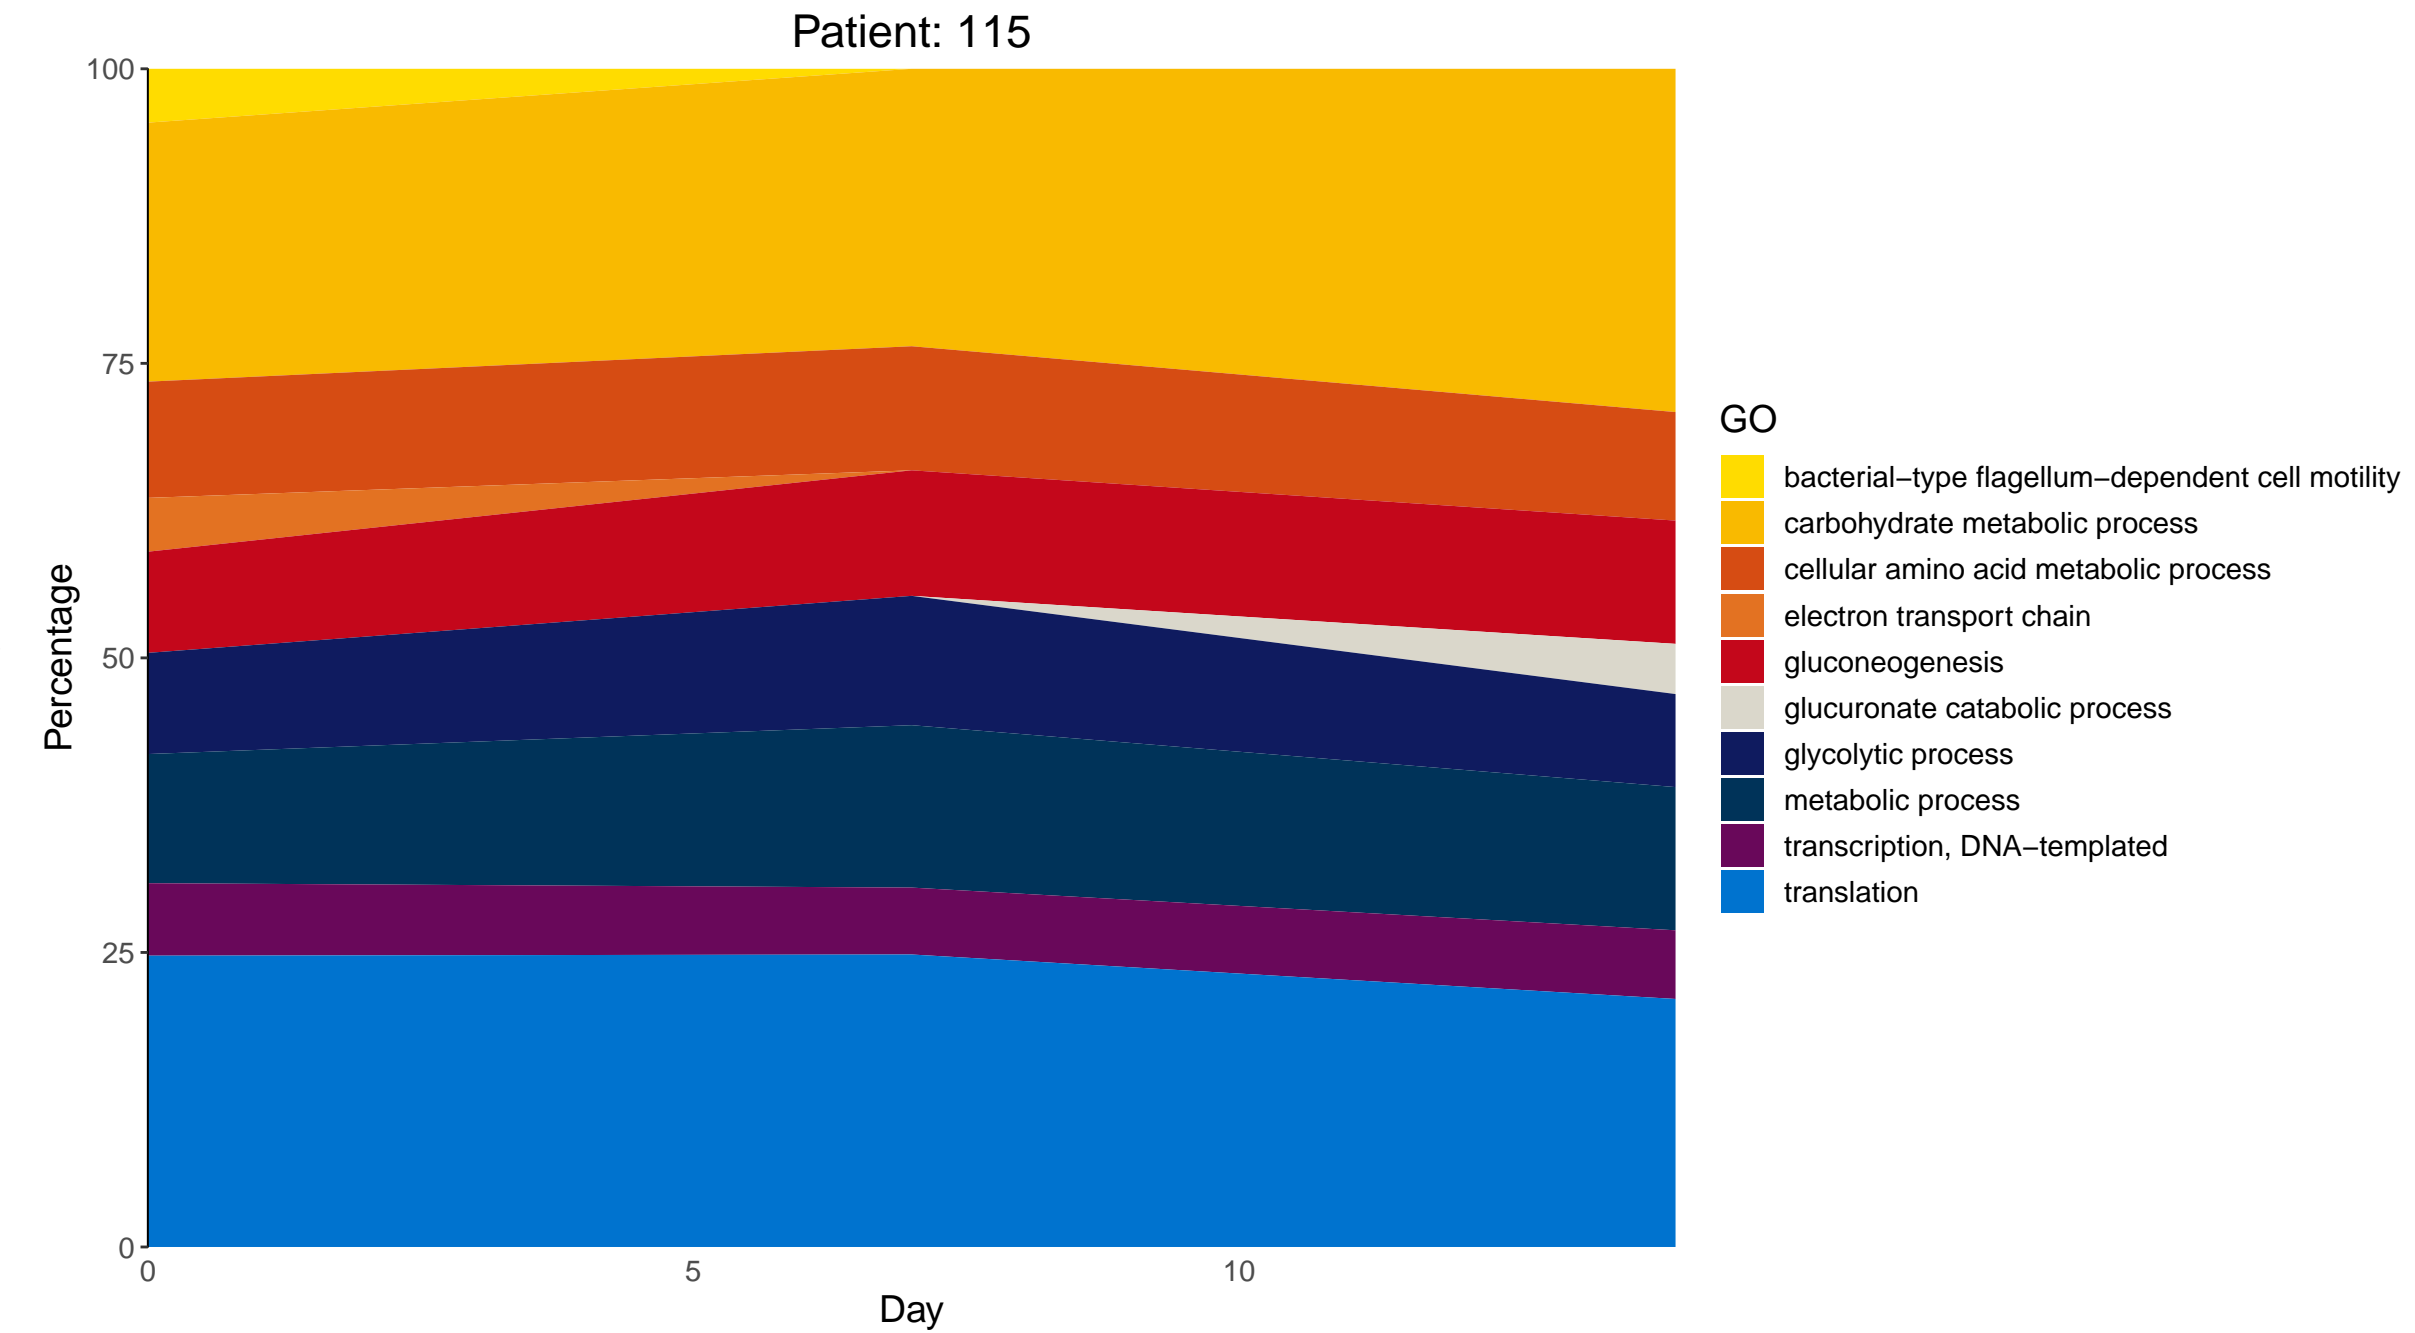

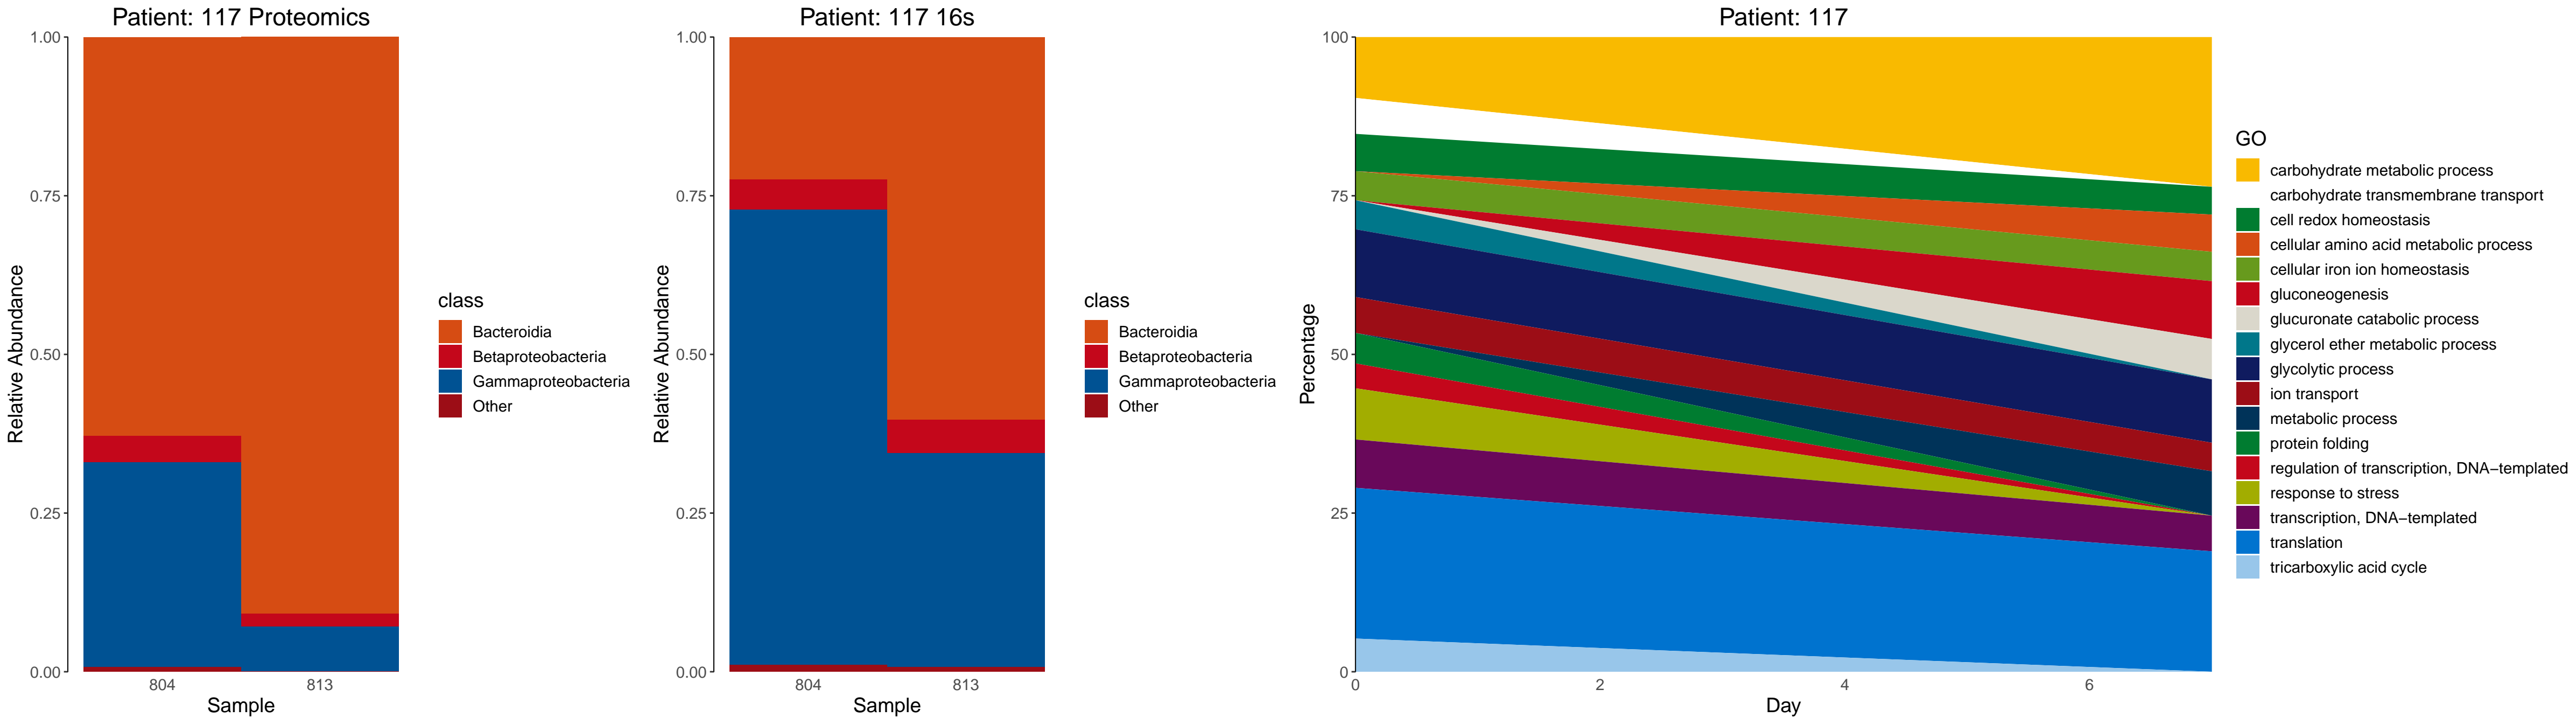

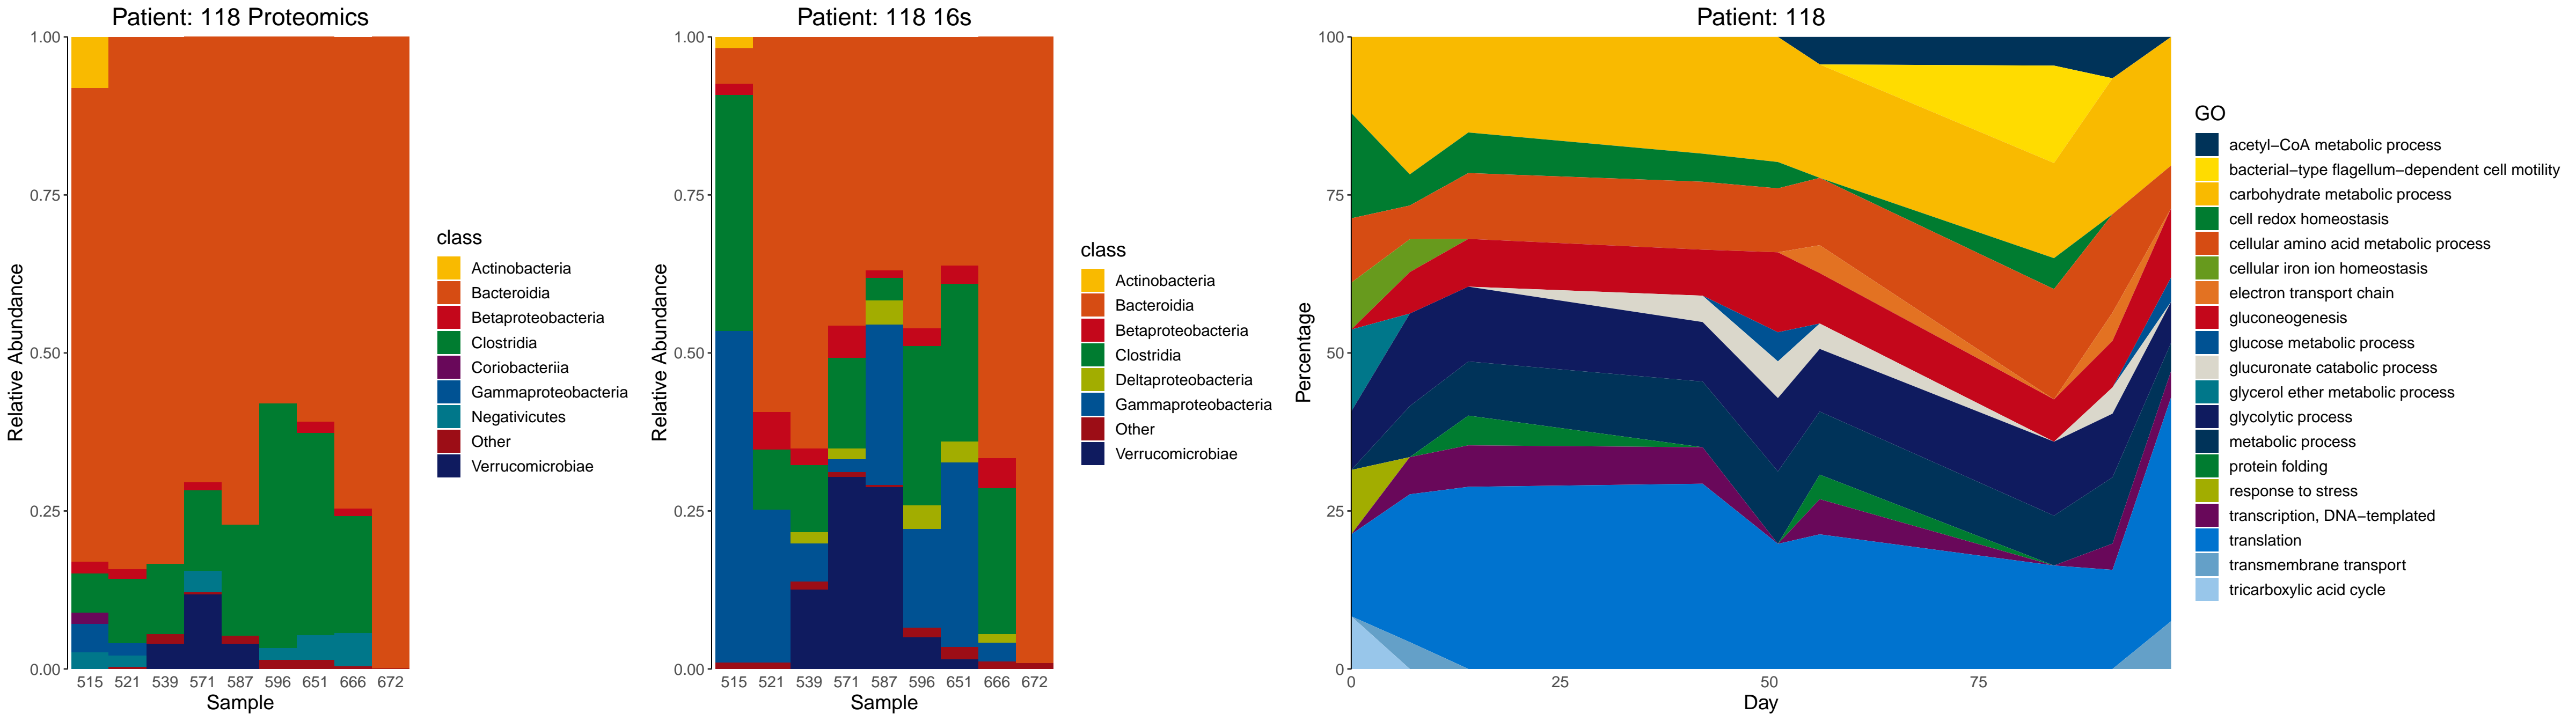



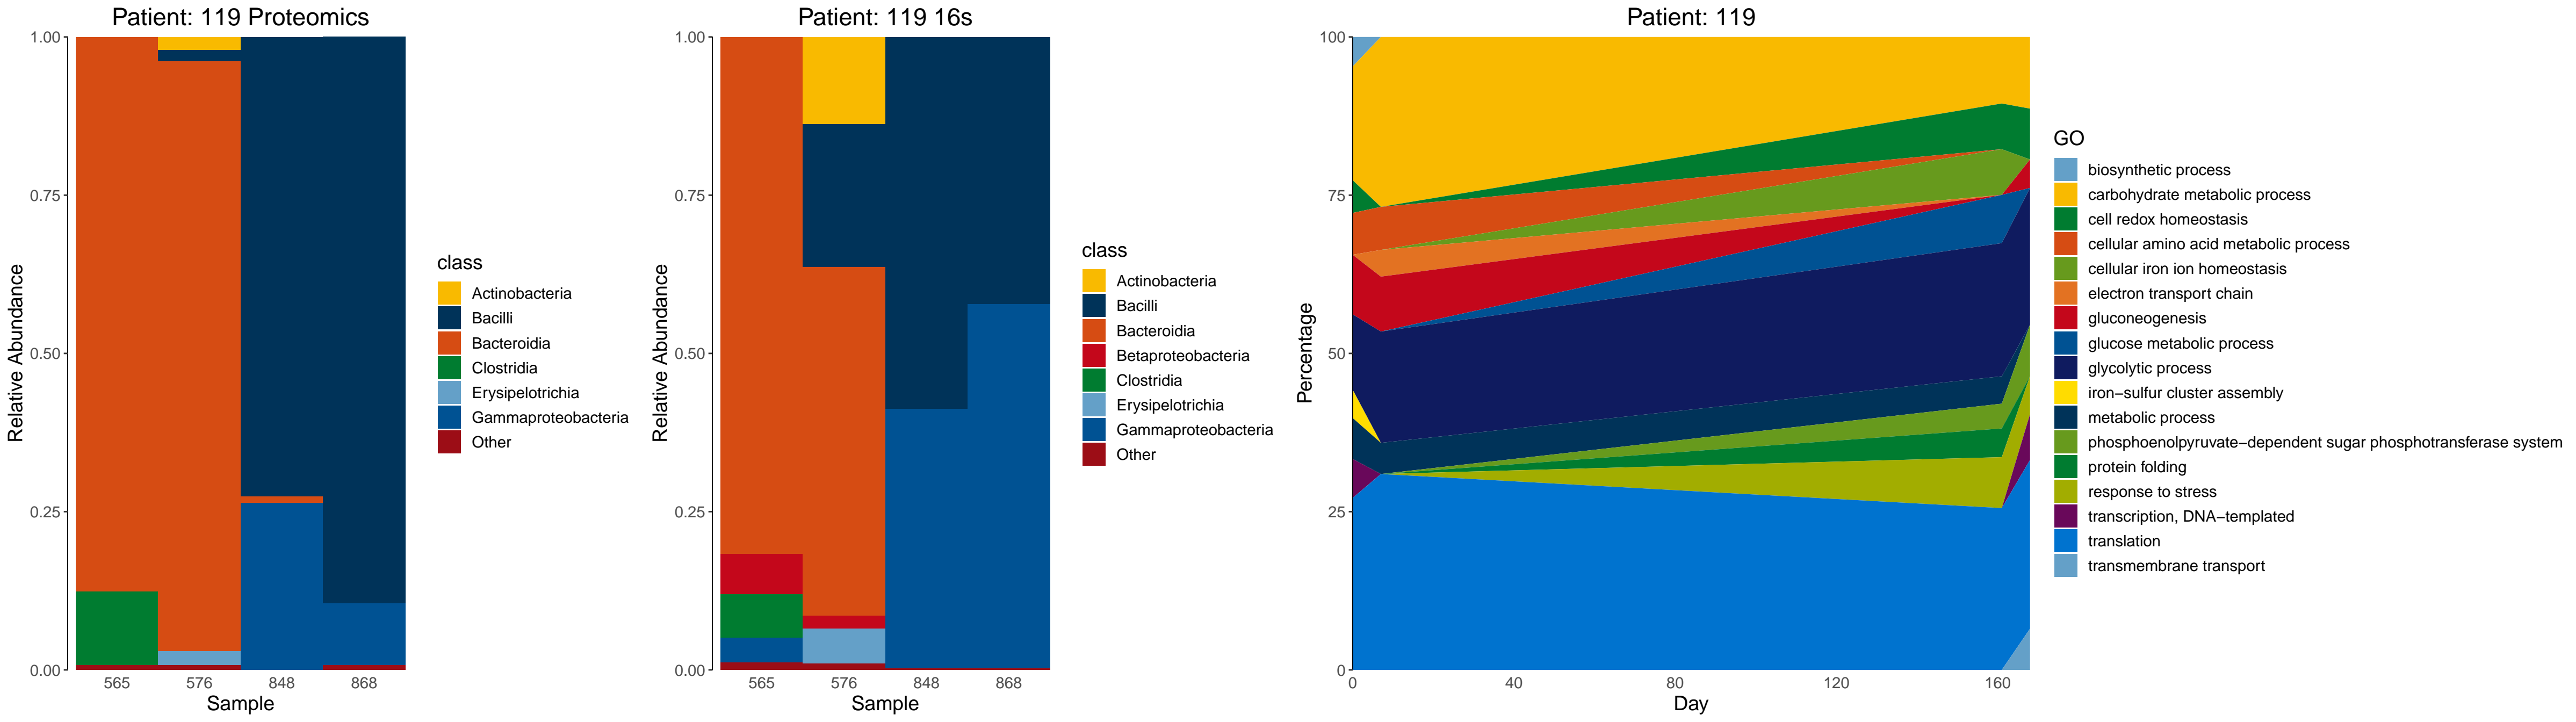

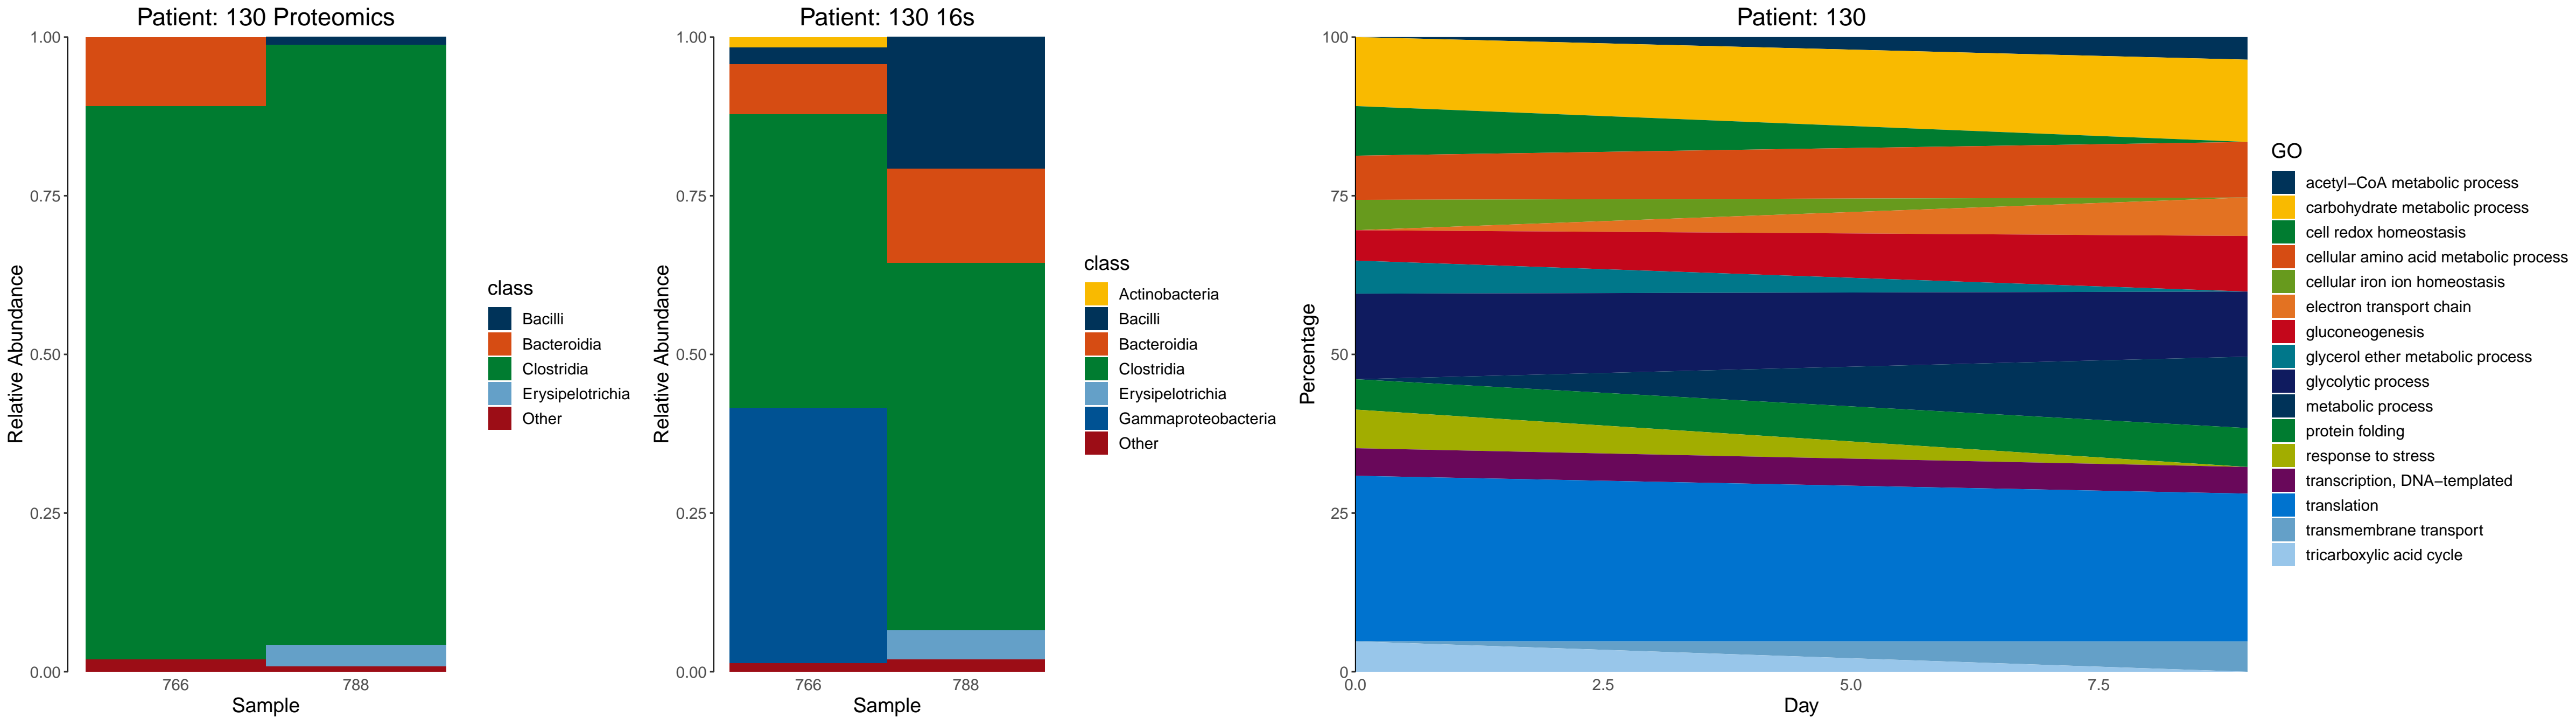

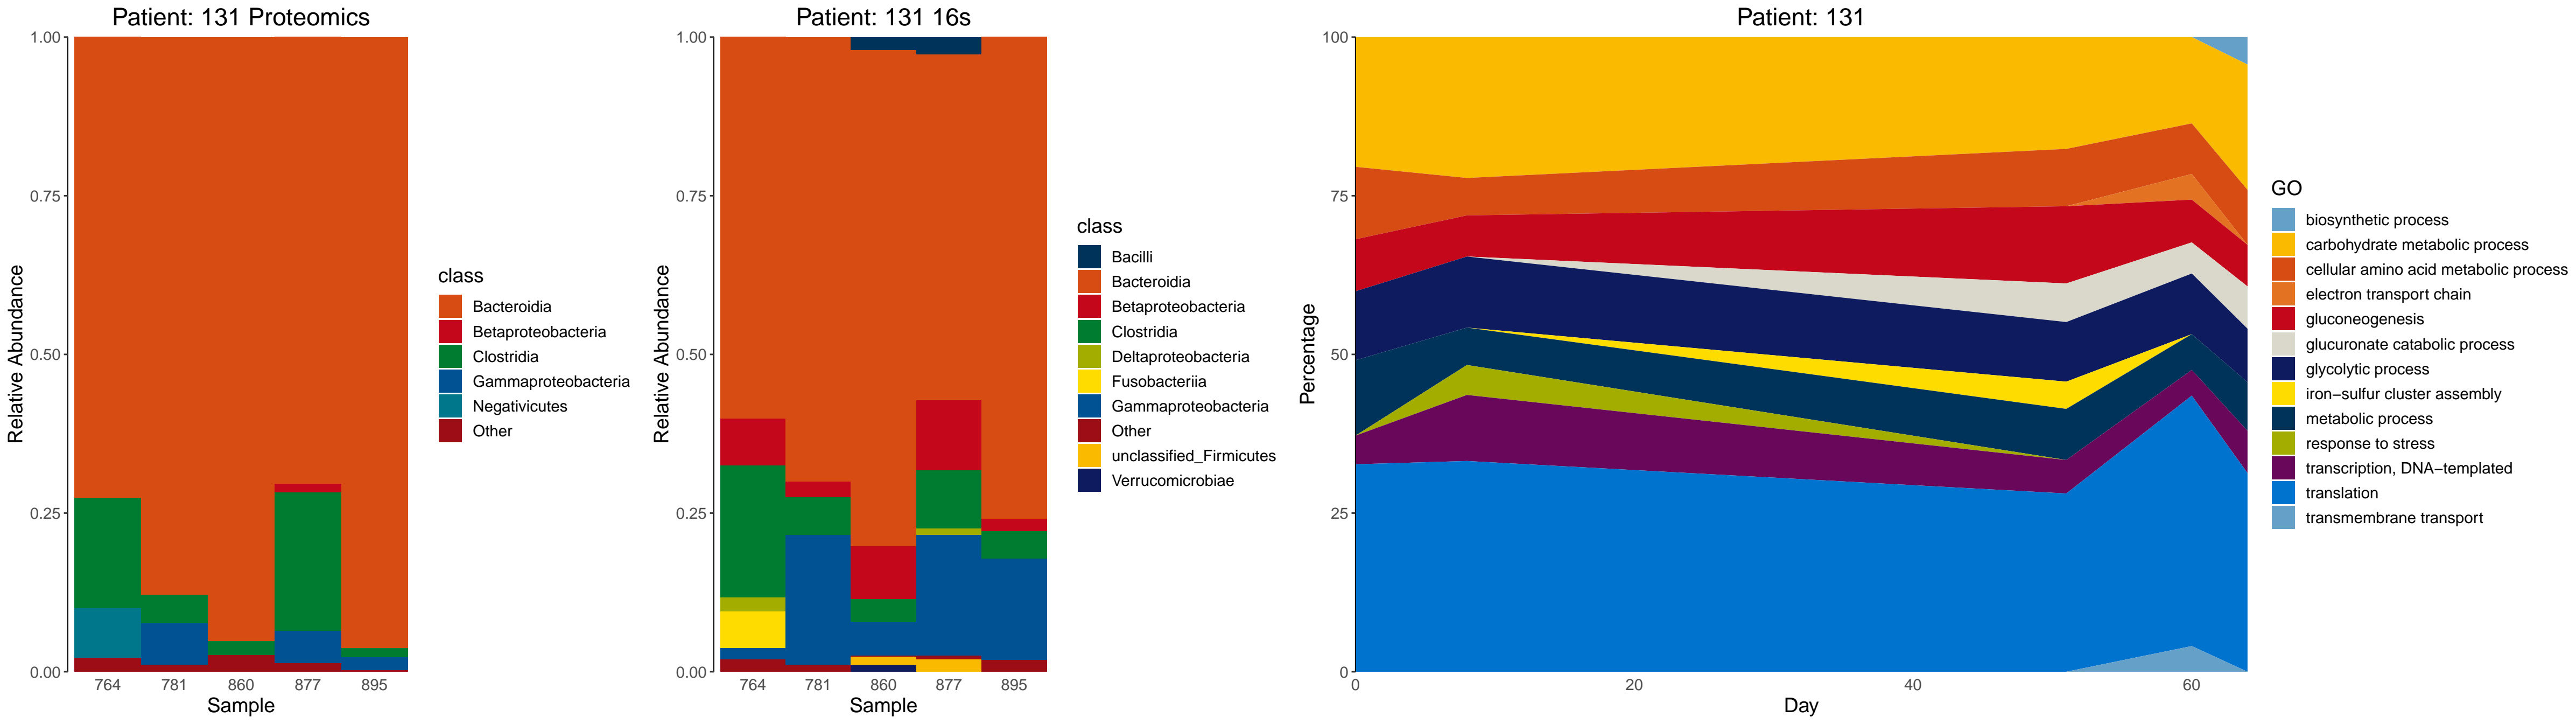

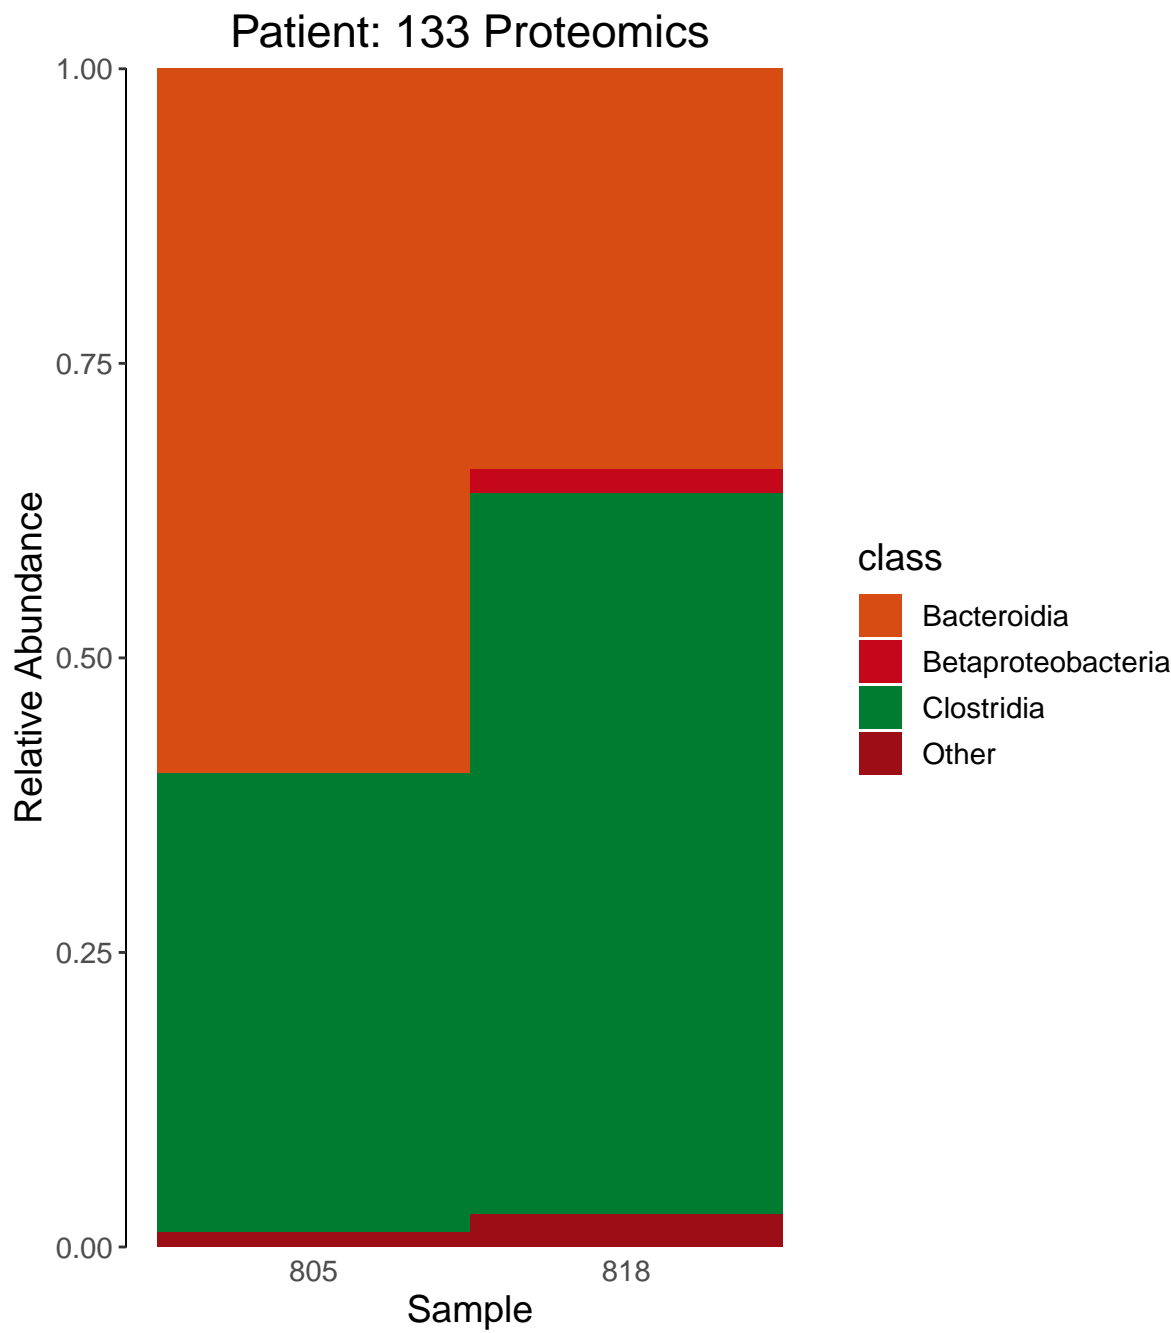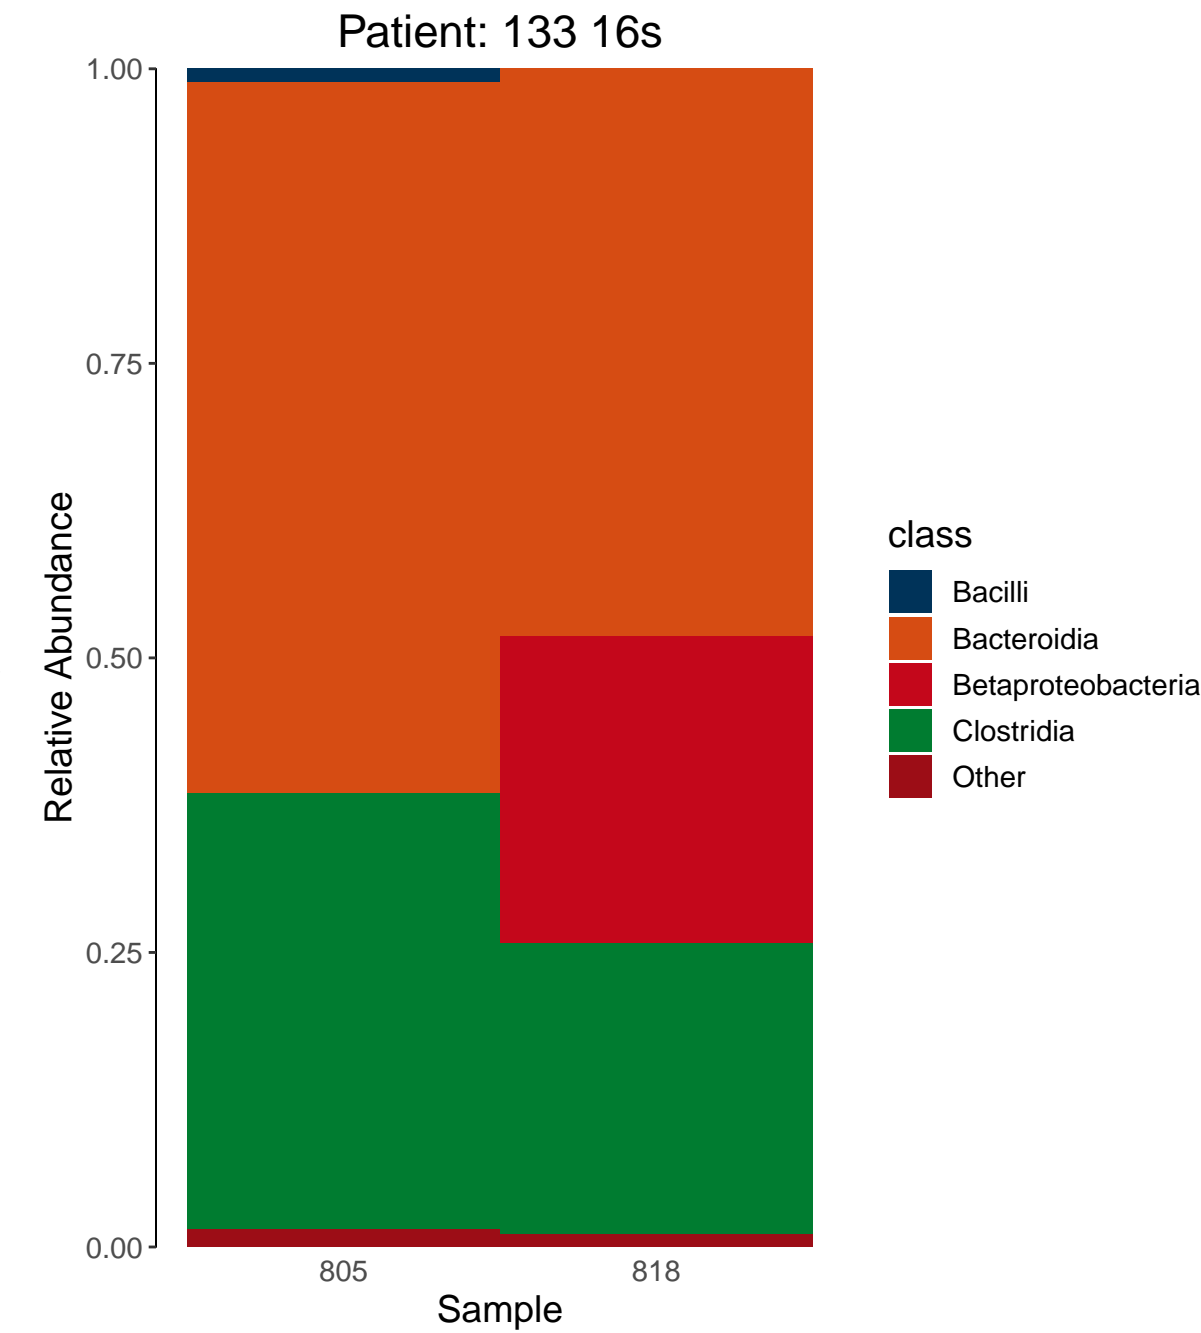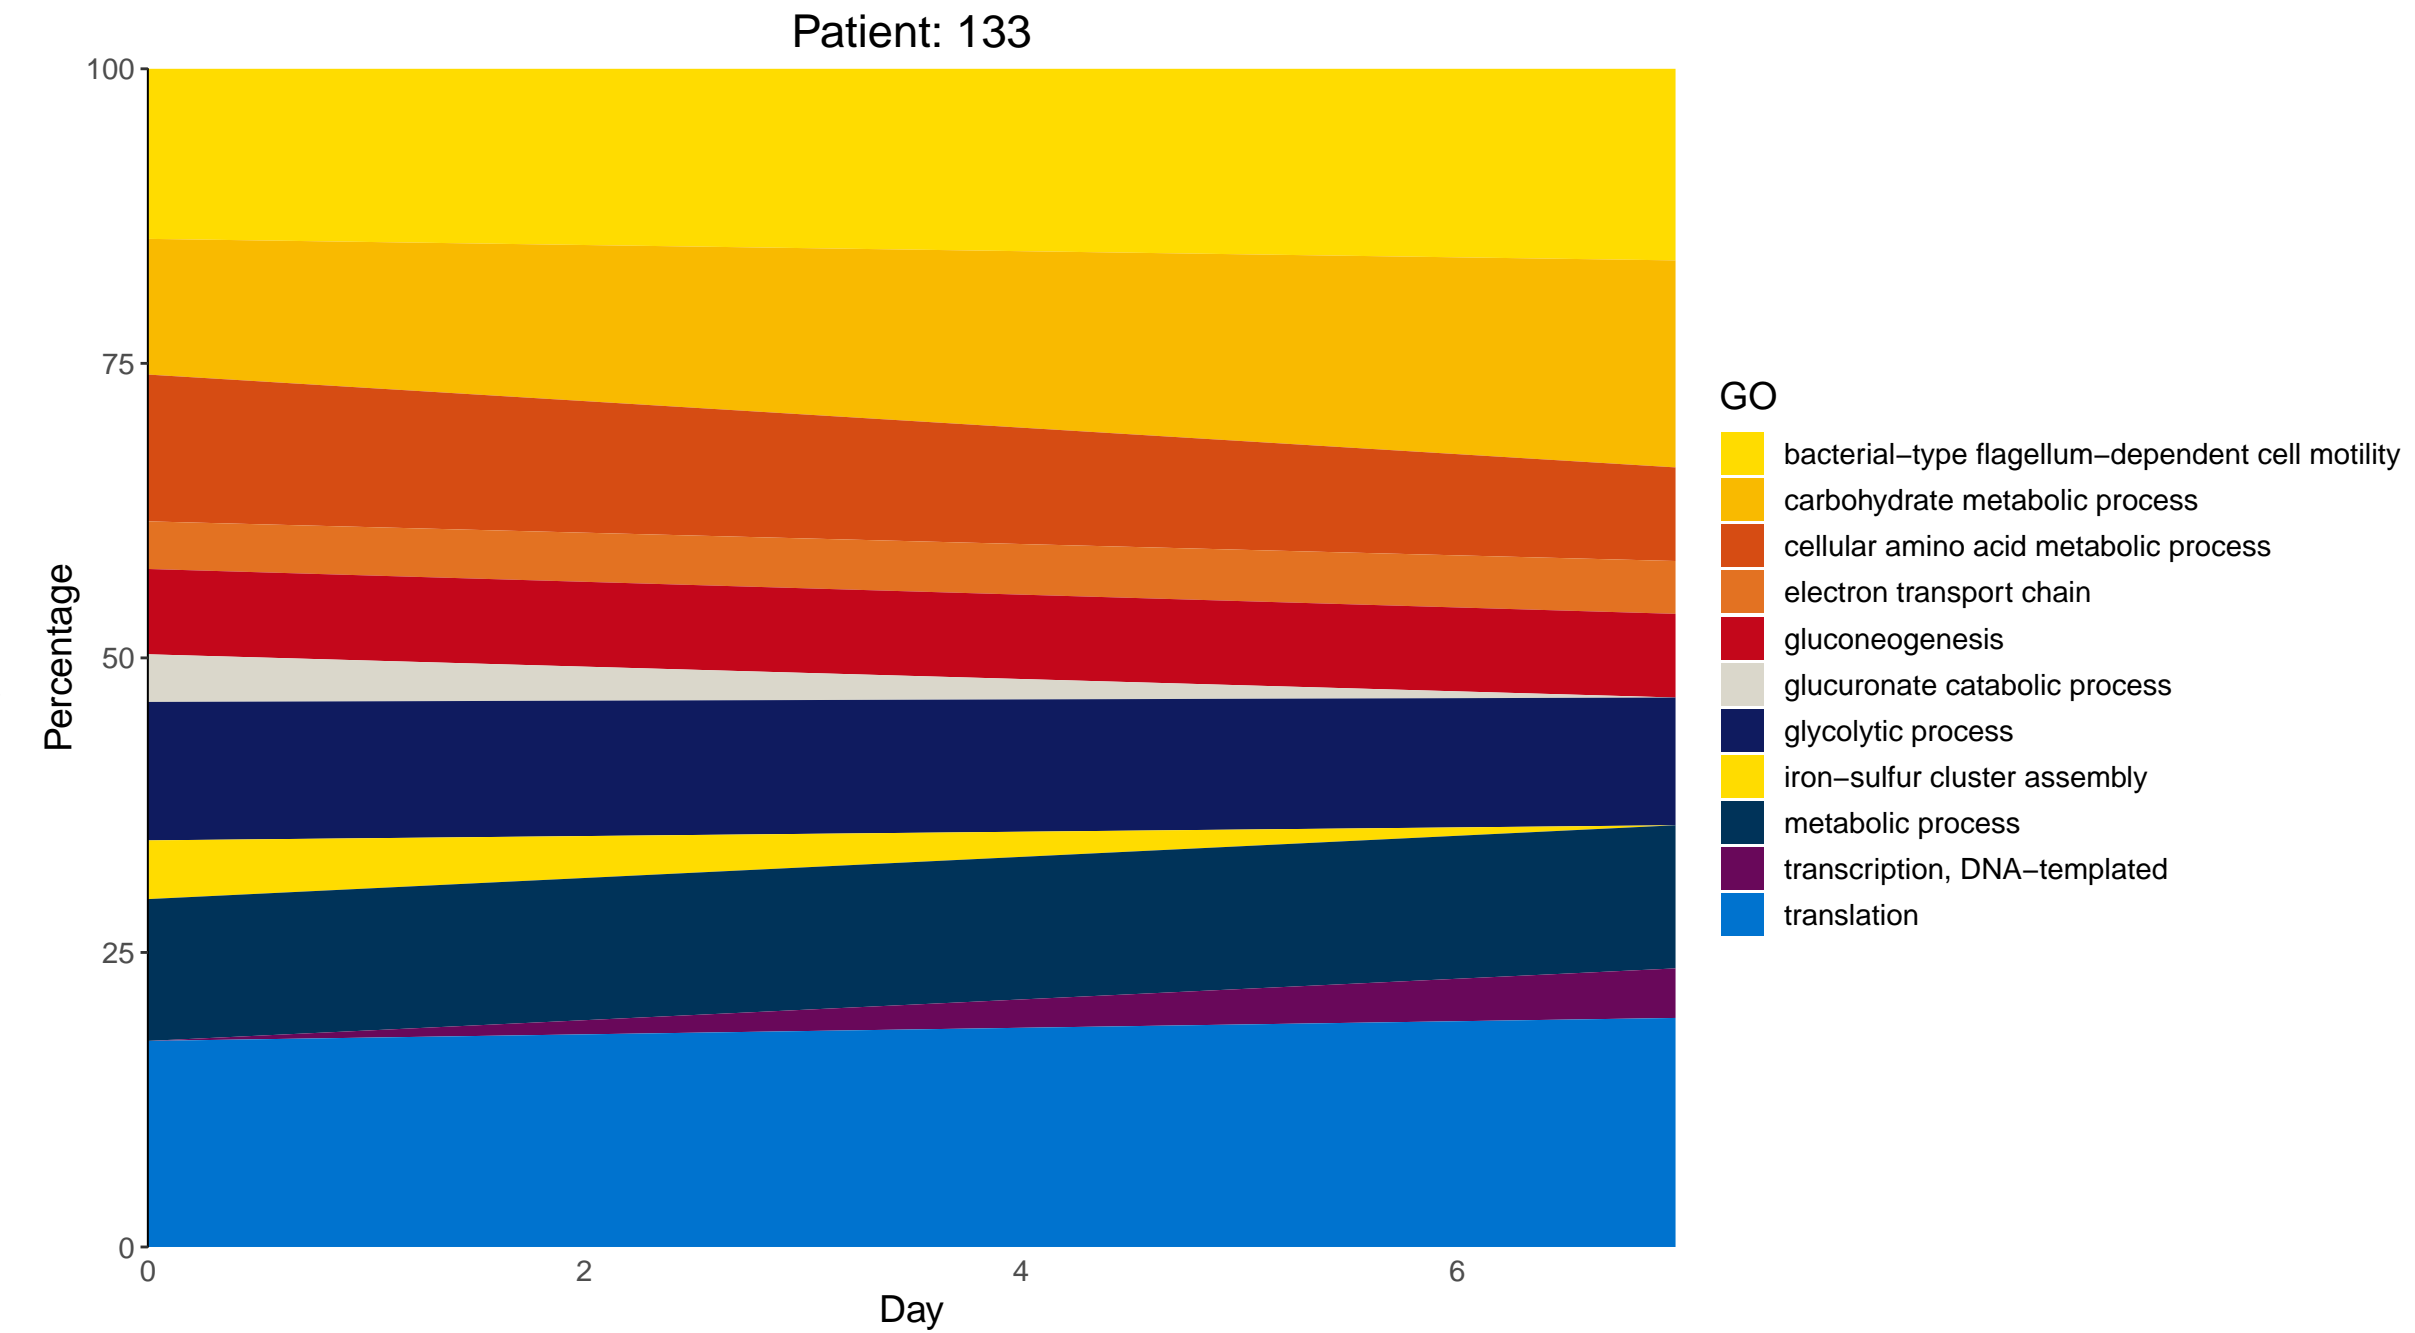

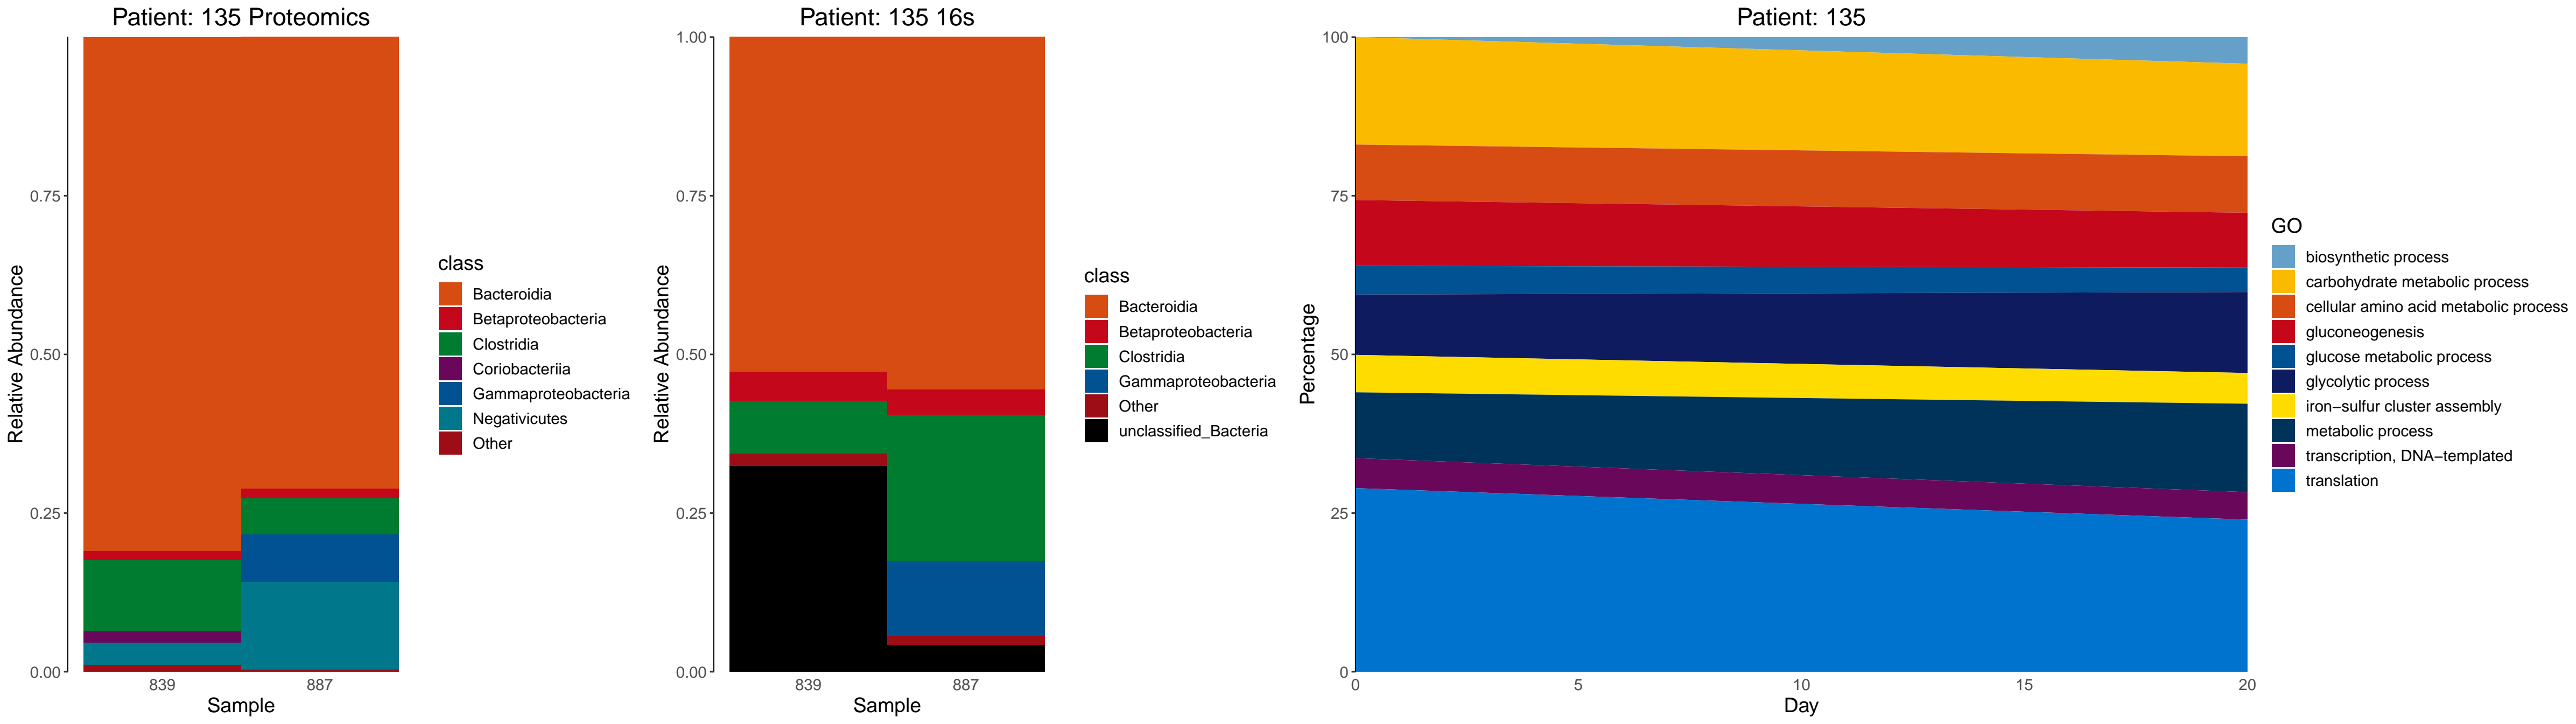

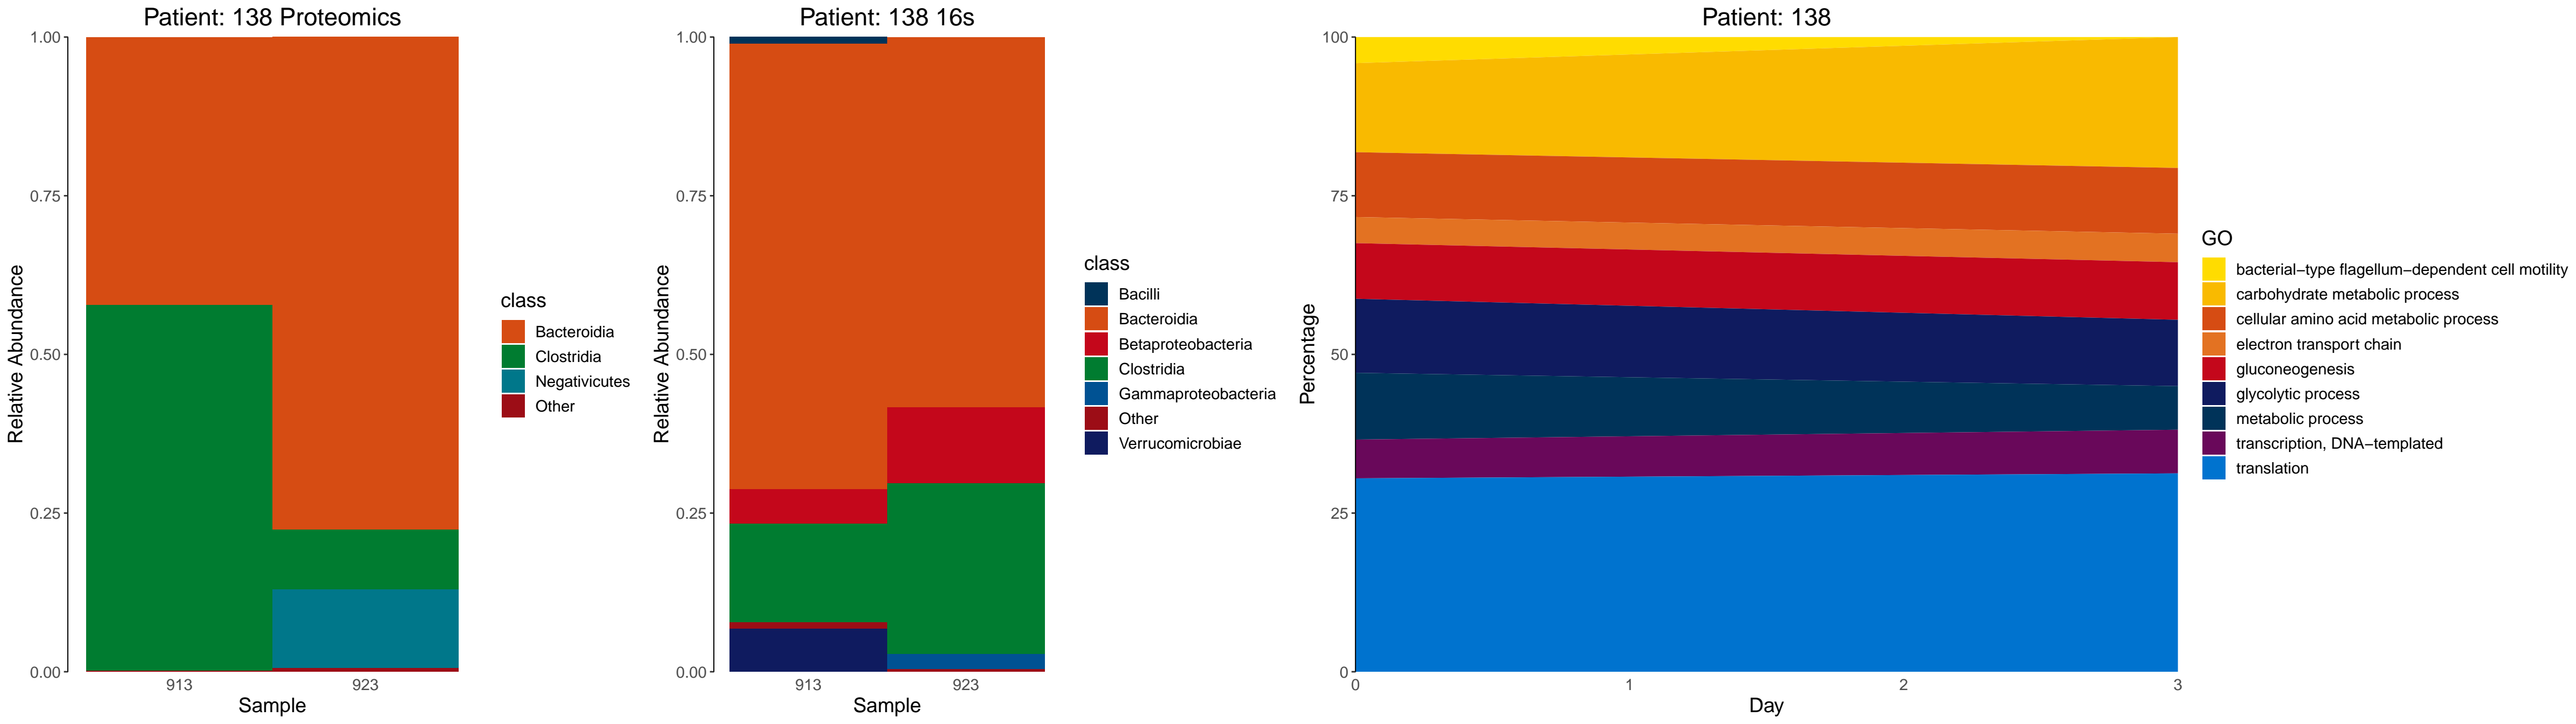

Supplement: s1 [file s1]
